# Supplementary material for: Inhibition of osteoblastic Smurf1 promotes bone formation in mouse models of distinctive age-related osteoporosis
Source: PubMed Central journal article supplement (PMC6109183; doi:10.1038/s41467-018-05974-z), 2018-08-24
Supplement: 41467_2018_5974_MOESM1_ESM.pdf [file 41467_2018_5974_MOESM1_ESM.pdf]

## **Supplementary Information**

### **Inhibition of osteoblastic Smurf1 promotes bone formation in mouse models of distinctive age-related osteoporosis**

Liang *et. al.*

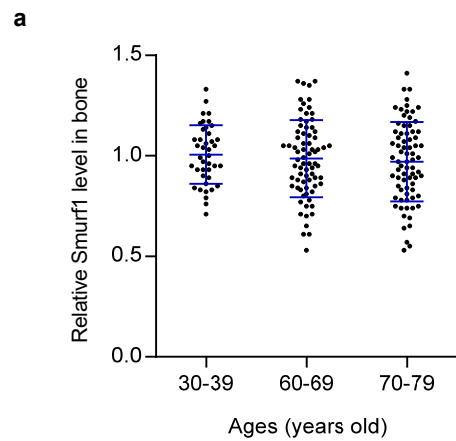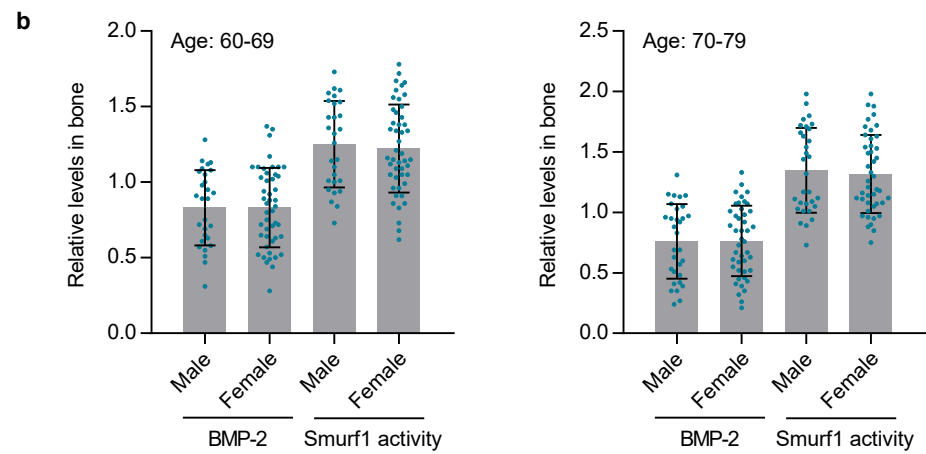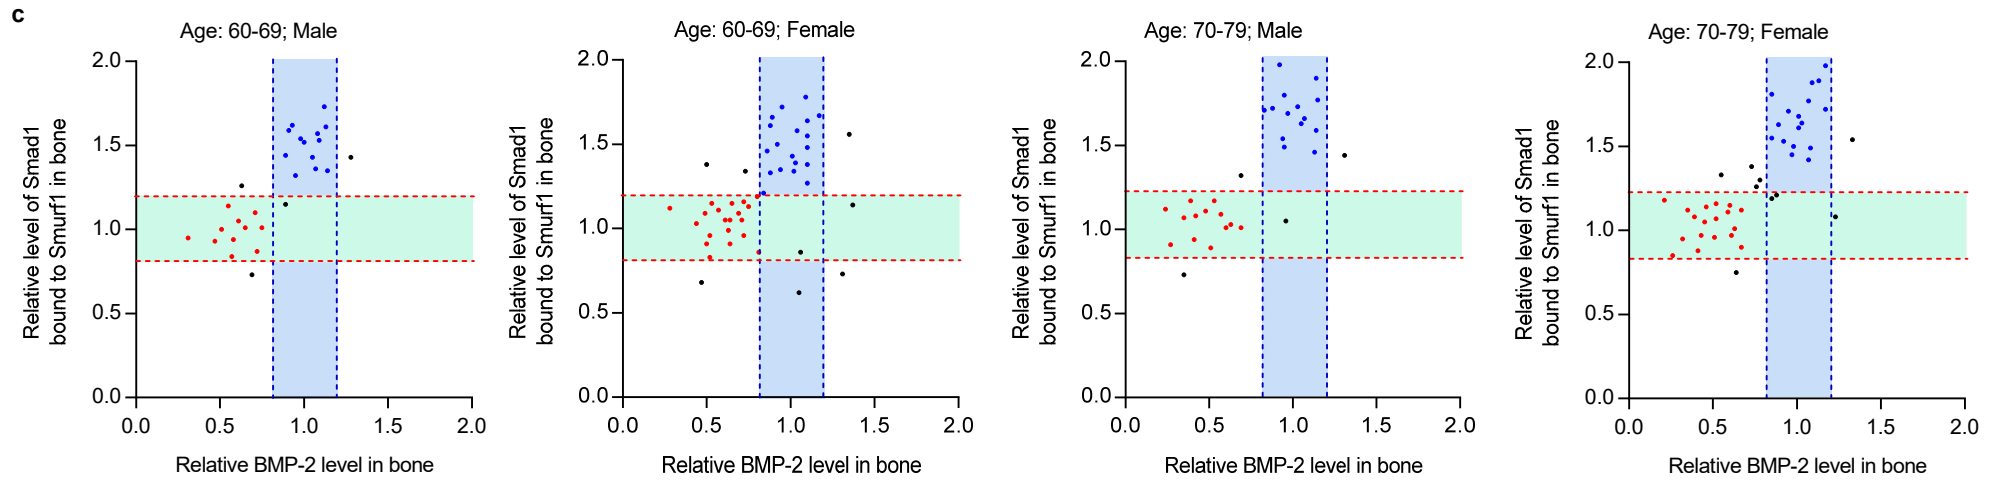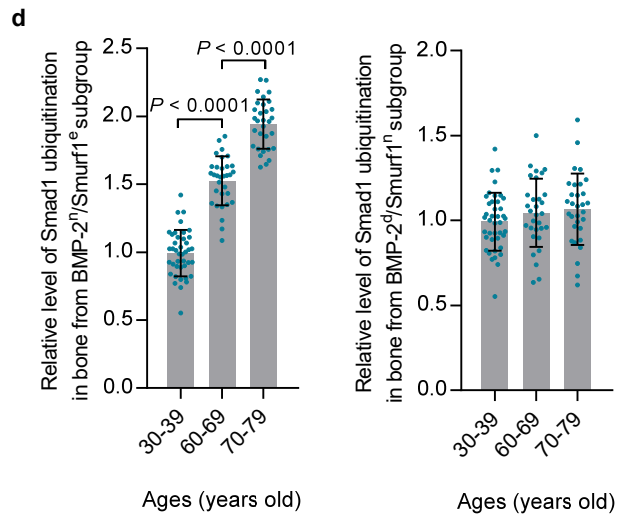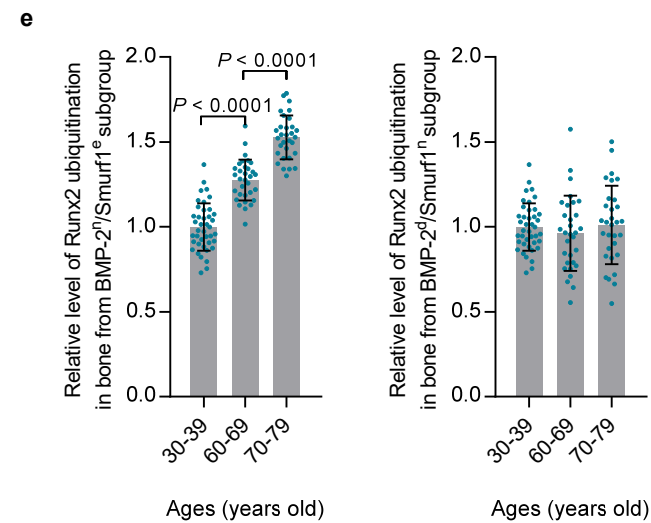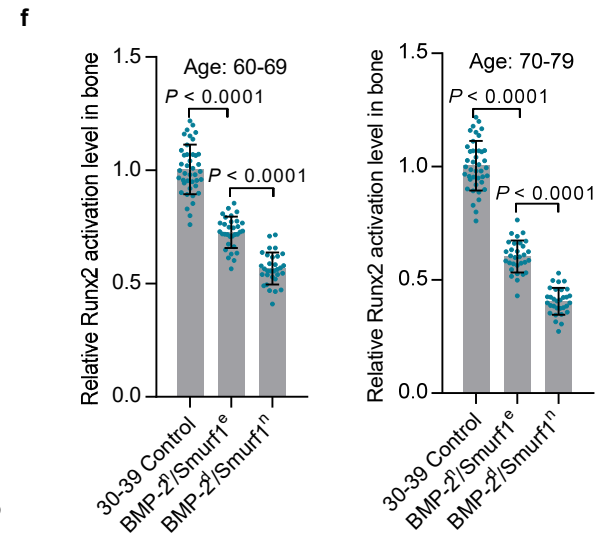

**Supplementary Figure 1. Smurf1 activity and osteogenic potential in BMP-2<sup>n</sup>/Smurf1<sup>e</sup> and BMP-2<sup>d</sup>/Smurf1<sup>n</sup> subgroups of aged osteoporotic VCF patients.** (a) Relative level of intraosseous Smurf1 in osteoporotic VCF patients aged 60-69 ( $n = 75$ ) or 70-79 years old ( $n = 75$ ). (b) Relative levels of intraosseous BMP-2 and Smurf1 activity (Smad1 bound to Smurf1) in aged male or female osteoporotic VCF patients (left, 60-69 age group; right, 70-79 age group;  $n = 27$  for male patients and  $n = 48$  for female patients in 60-69 age group;  $n = 31$  for male patients and  $n = 44$  for female patient in 70-79 age group). (c) Classification of male or female osteoporotic VCF patients into subgroups based on distinct intraosseous BMP-2 levels and Smurf1 activity (Smad1 bound to Smurf1) (left, male patients in 60-69 age group; middle left, female patients in 60-69 age group; middle right, male patients in 70-79 age group; right, female patients in 70-79 age group). Relative levels of intraosseous BMP-2 (mean  $\pm$  s.d., indicated by the two blue dashed lines) and Smad1 bound to Smurf1 (mean  $\pm$  s.d., indicated by the two red dashed lines) in adult traumatic VCF patients (30-39 years old) served as cutoff parameters. (d) Relative level of intraosseous Smad1 ubiquitination in BMP-2<sup>n</sup>/Smurf1<sup>e</sup> subgroup (left;  $n = 32$  for 60-69 years old;  $n = 31$  for 70-79 years old) and BMP-2<sup>d</sup>/Smurf1<sup>n</sup> subgroup (right;  $n = 31$  for 60-69 years old;  $n = 31$  for 70-79 years old). (e) Relative level of intraosseous Runx2 ubiquitination in the above two subgroups. (f) Relative level of intraosseous Runx2 activation in the above two subgroups of aged osteoporotic VCF patients (left, 60-69 years old; right, 70-79 years old). The levels of Smurf1 and BMP-2, Smad1 bound to Smurf1, Runx2 activation and ubiquitination of Smad1 and Runx2 were normalized to the mean values of adult traumatic VCF patients (30-39 years old) ( $n = 41$ ). Data are mean  $\pm$  s.d. followed by one-way ANOVA with a *post-hoc* test or Student's *t* test.

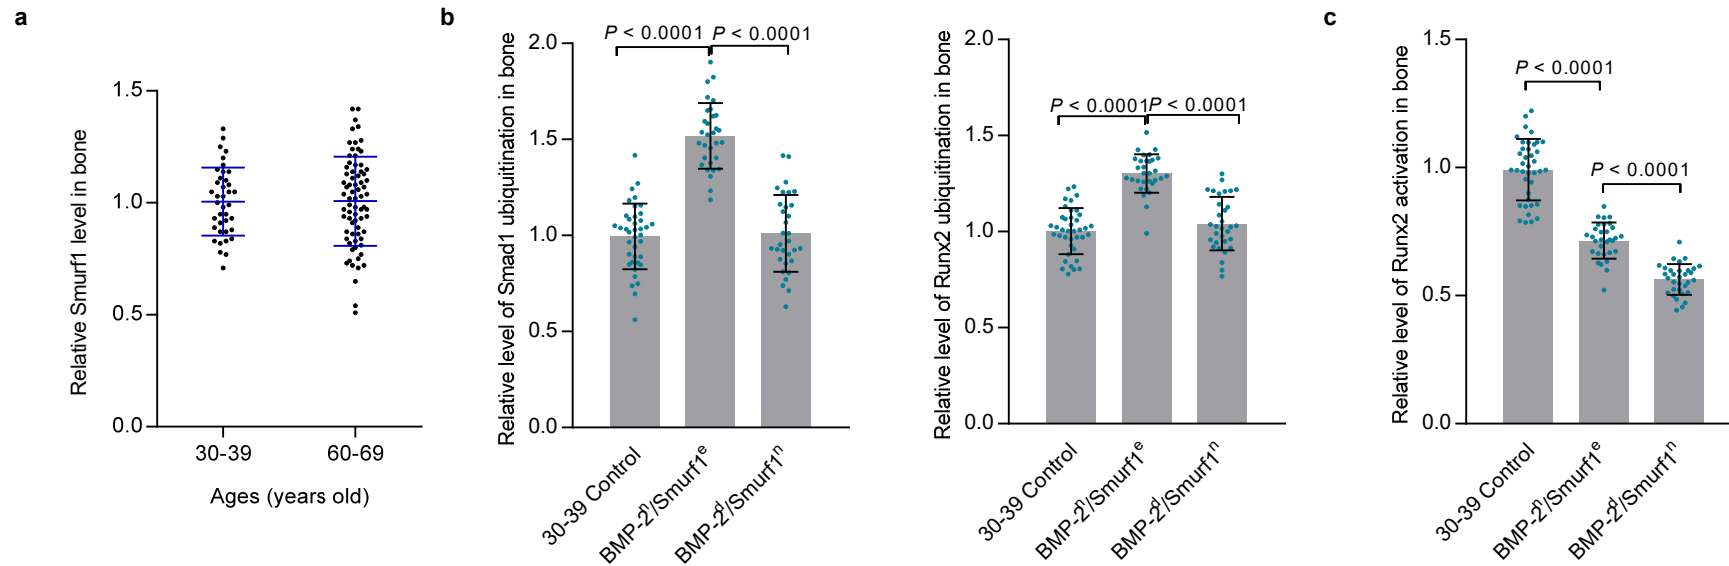

**Supplementary Figure 2. Smurf1 activity and osteogenic potential in BMP-2<sup>n</sup>/Smurf1<sup>e</sup> and BMP-2<sup>d</sup>/Smurf1<sup>n</sup> subgroups of aged osteoporotic LSS patients.** (a) Relative level of intraosseous Smurf1 in osteoporotic LSS patients aged 60-69 years old ( $n = 74$ ). (b) Relative levels of intraosseous Smad1 and Runx2 ubiquitination in BMP-2<sup>n</sup>/Smurf1<sup>e</sup> subgroup ( $n = 31$ ) and BMP-2<sup>d</sup>/Smurf1<sup>n</sup> subgroup ( $n = 32$ ). (c) Relative level of intraosseous Runx2 activation in the above two subgroups. The levels of Smurf1, Runx2 activation and ubiquitination of Smad1 and Runx2 were normalized to the mean values of adult LDH patients (30-39 years old) ( $n = 39$ ). Data are mean  $\pm$  s.d. followed by one-way ANOVA with a *post-hoc* test or Student's *t* test.

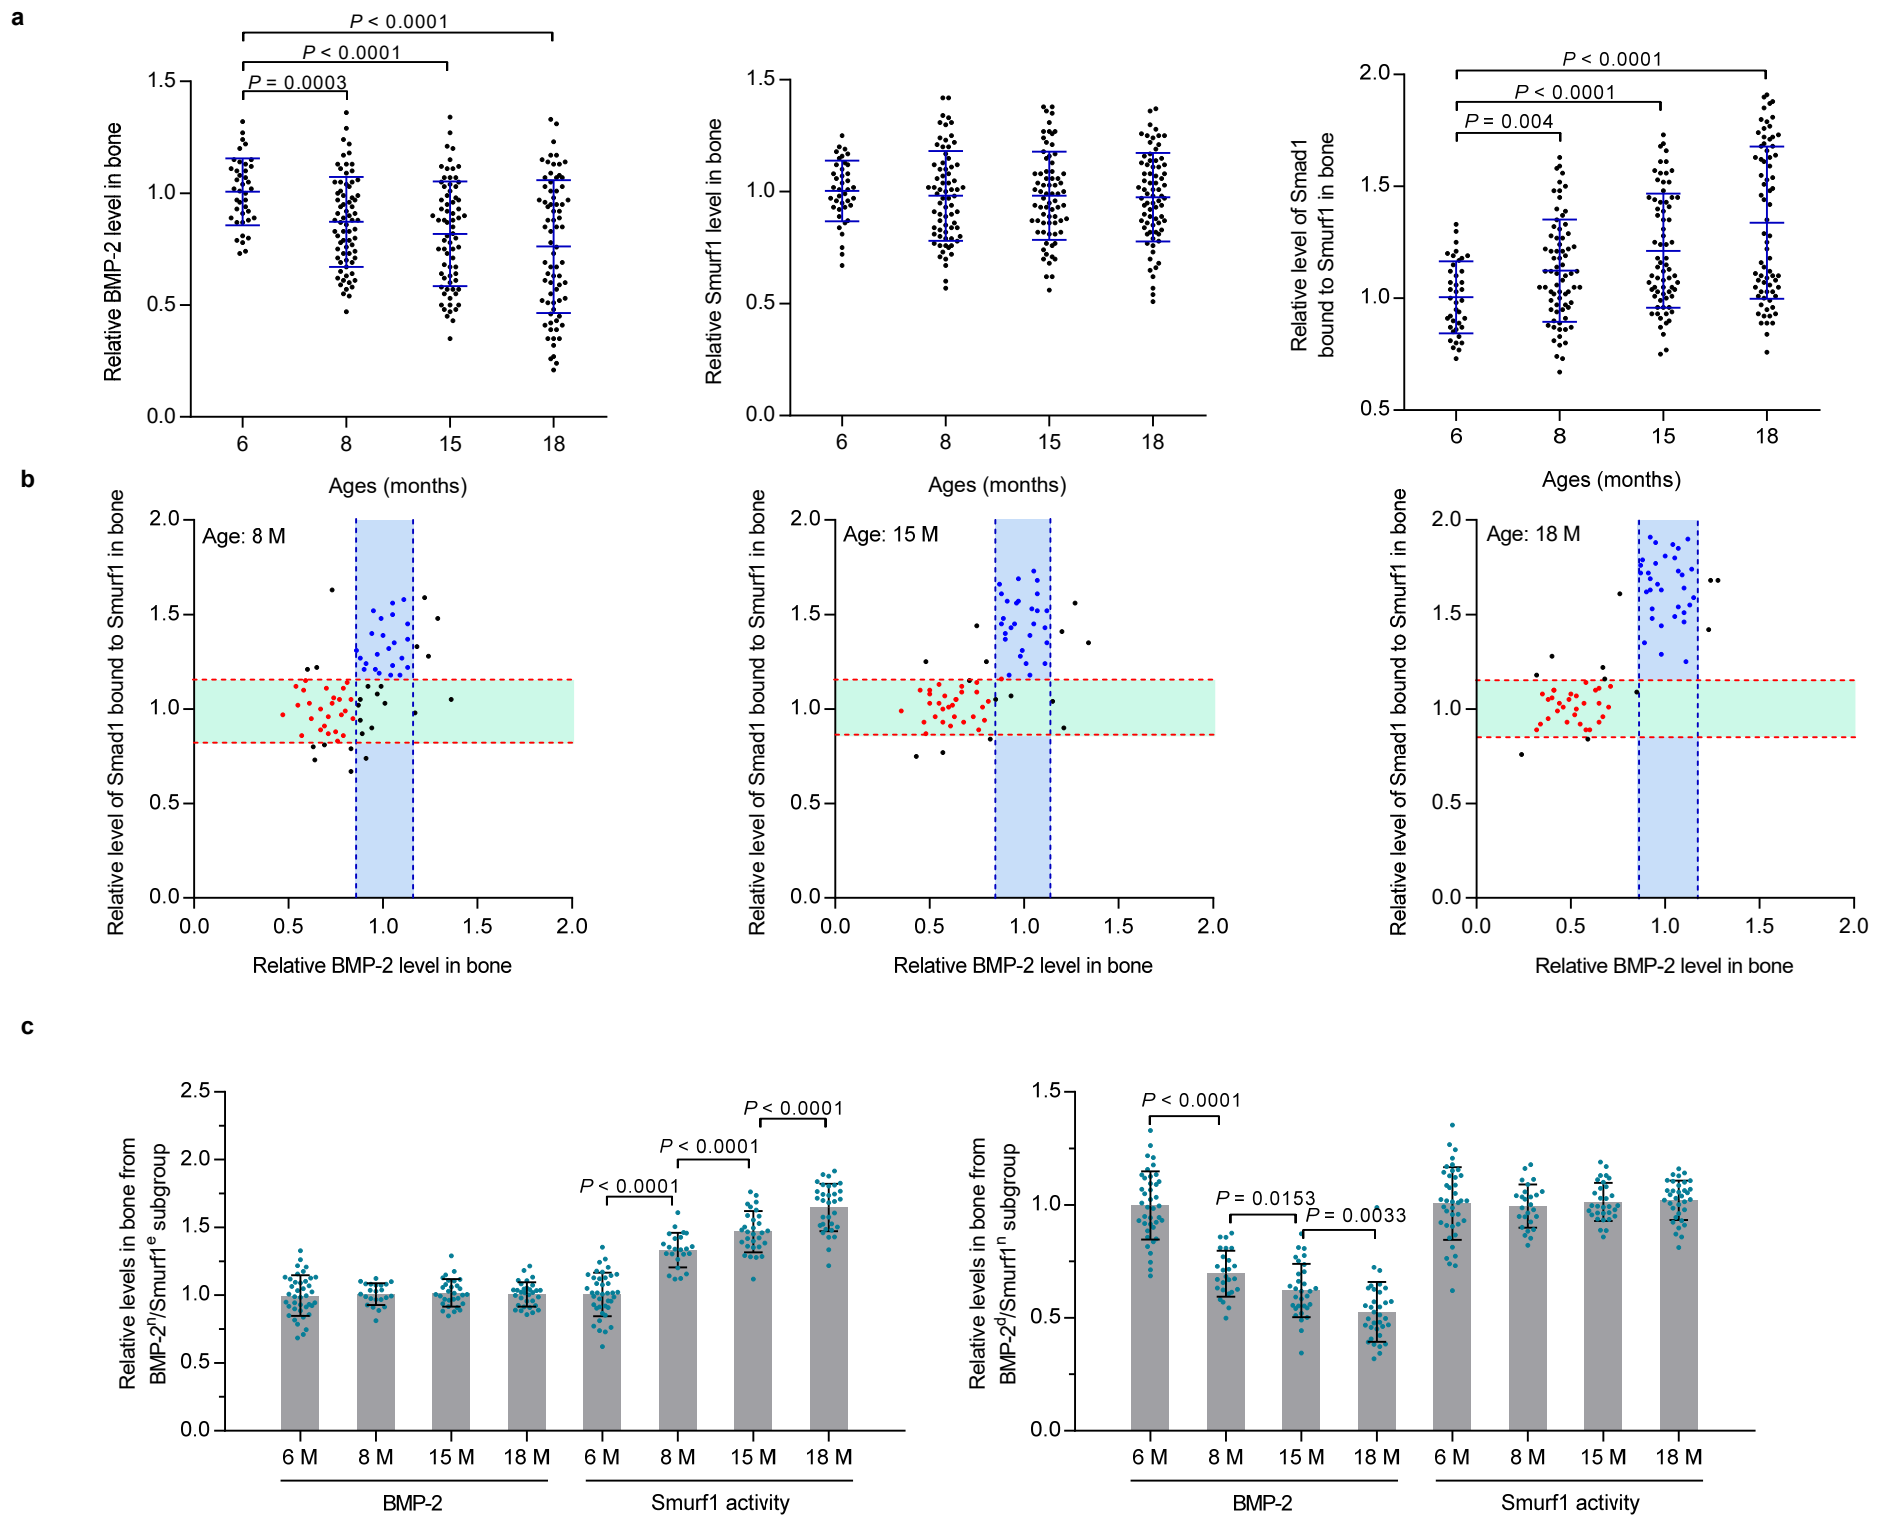

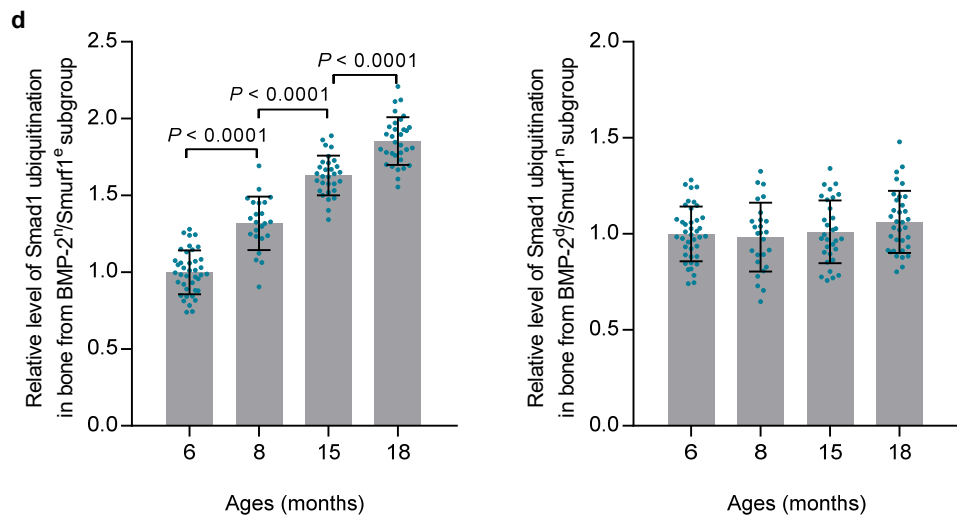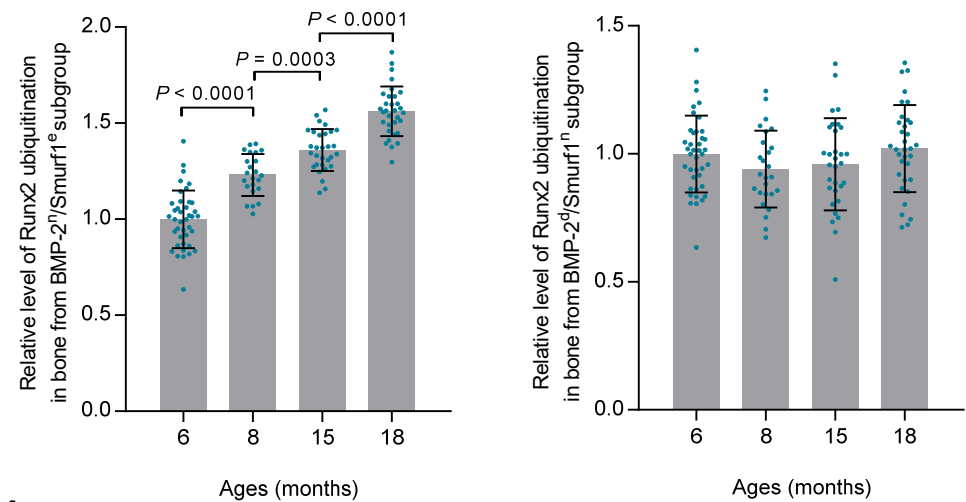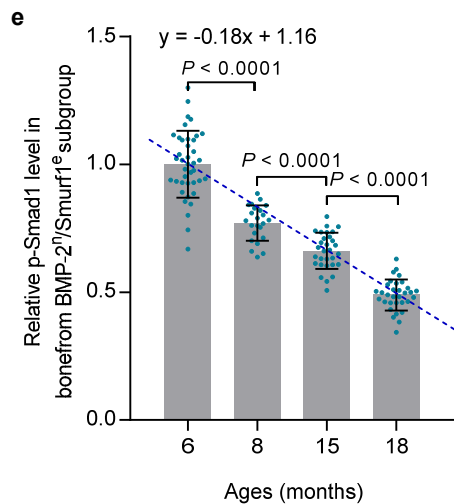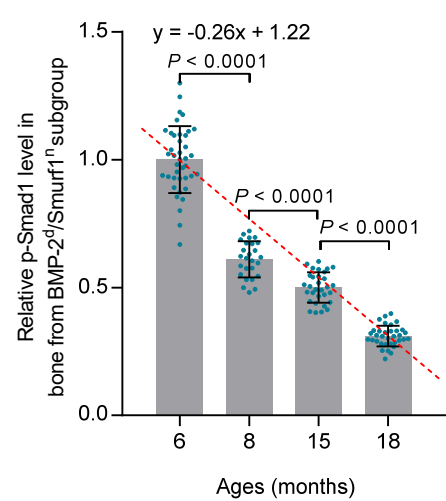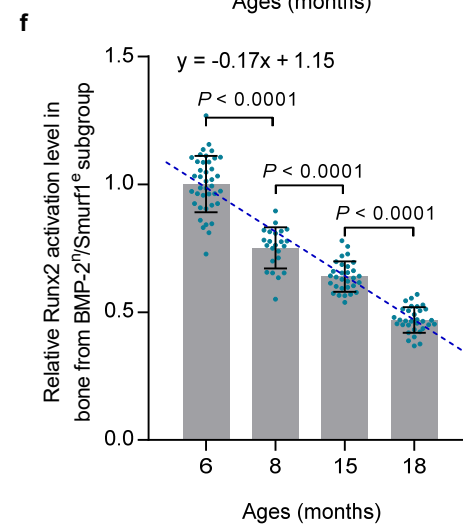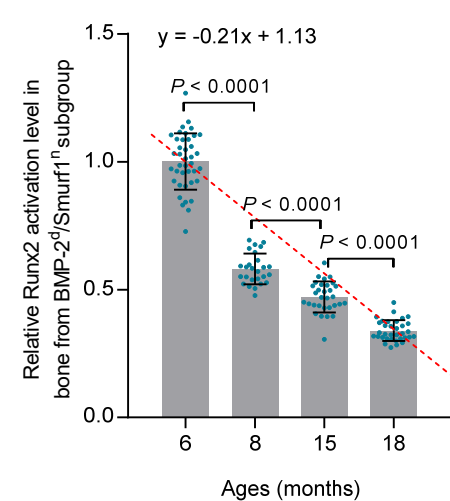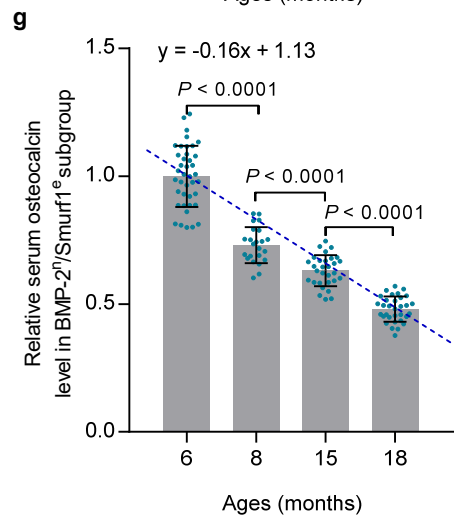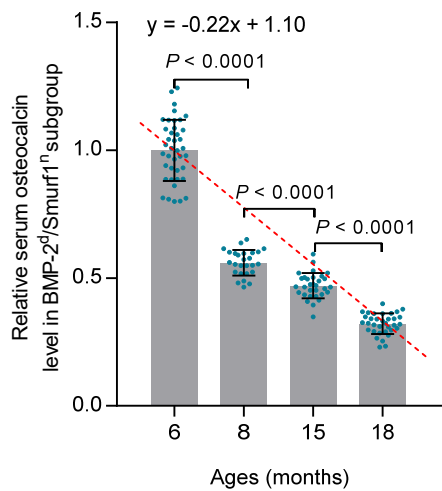

**Supplementary Figure 3. BMP signaling, Smurf1 activity and osteogenic potential in subgroups of aged osteoporotic mice.** (a) Levels of intraosseous BMP-2 (left), Smurf1 (middle) and Smurf1 activity (Smad1 bound to Smurf1, right) in osteoporotic mice ( $n = 73$  for 8-month-old;  $n = 72$  for 15-month-old;  $n = 75$  for 18-month-old). 6-month-old female mice were OVX and left untreated for 2 months (8-month-old), 9 months (15-month-old) or 12 months (18-month-old) to induce age-related osteoporosis. (b) Classification of osteoporotic mice into subgroups based on distinct intraosseous levels of BMP-2 and Smurf1 activity (Smad1 bound to Smurf1) (left, 8-month-old; middle, 15-month-old; right, 18-month-old). The cluster of blue dots, BMP-2<sup>n</sup>/Smurf1<sup>e</sup> subgroup; the cluster of red dots, BMP-2<sup>d</sup>/Smurf1<sup>n</sup> subgroup. Relative levels of intraosseous BMP-2 (mean  $\pm$  s.d., indicated by the two blue dashed lines) and Smad1 bound to Smurf1 (mean  $\pm$  s.d., indicated by the two red dashed lines) in healthy adult 6-month-old mice served as cutoff parameters. (c) Relative levels of intraosseous BMP-2 and Smurf1 activity (Smad1 bound to Smurf1) in BMP-2<sup>n</sup>/Smurf1<sup>e</sup> subgroup (left;  $n = 23$  for 8-month-old;  $n = 30$  for 15-month-old;  $n = 32$  for 18-month-old) and BMP-2<sup>d</sup>/Smurf1<sup>n</sup> subgroup (right;  $n = 26$  for 8-month-old;  $n = 31$  for 15-month-old;  $n = 34$  for 18-month-old), respectively. (d) Relative levels of intraosseous Smad1 and Runx2 ubiquitination in the above two subgroups. (e) Relative level of intraosseous p-Smad1 in the above two subgroups. Blue dashed line: age-related change in BMP-2<sup>n</sup>/Smurf1<sup>e</sup> subgroup; red dashed line: age-related change in BMP-2<sup>d</sup>/Smurf1<sup>n</sup> subgroup. (f) Relative level of intraosseous Runx2 activation in the above two subgroups. Blue dashed line: age-related change in BMP-2<sup>n</sup>/Smurf1<sup>e</sup> subgroup; red dashed line: age-related change in BMP-2<sup>d</sup>/Smurf1<sup>n</sup> subgroup. (g) Relative level of serum osteocalcin in the above two subgroups. Blue dashed line, age-related change in BMP-2<sup>n</sup>/Smurf1<sup>e</sup> subgroup; red dashed line, age-related change in BMP-2<sup>d</sup>/Smurf1<sup>n</sup> subgroup. The levels of BMP-2, p-Smad1 and osteocalcin, Runx2 activation, Smad1 bound to Smurf1 and ubiquitination of Smad1 and Runx2 were normalized to the mean values of healthy adult 6-month-old mice ( $n = 40$ ). Data are mean  $\pm$  s.d. followed by one-way ANOVA with a *post-hoc* test.

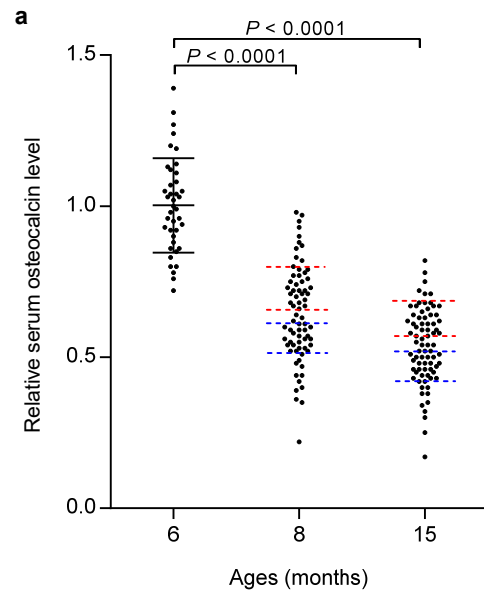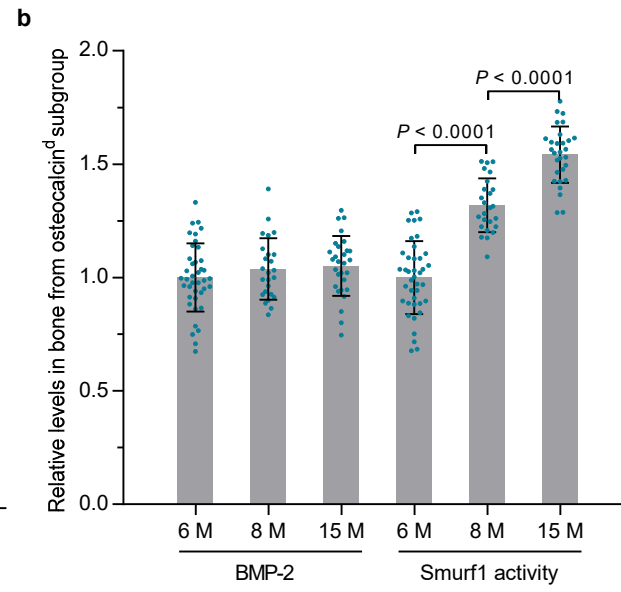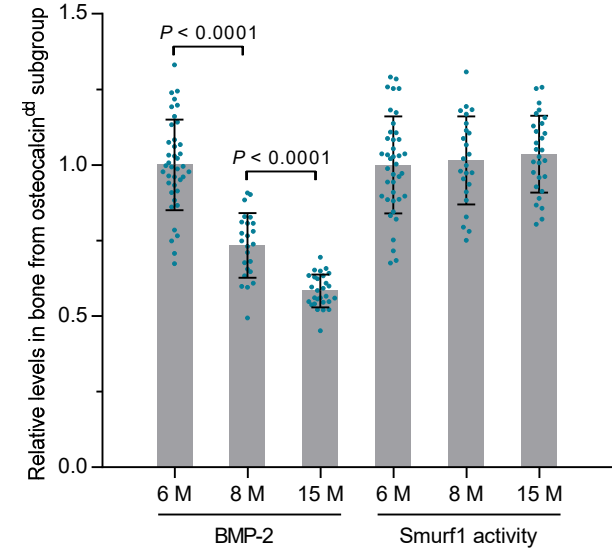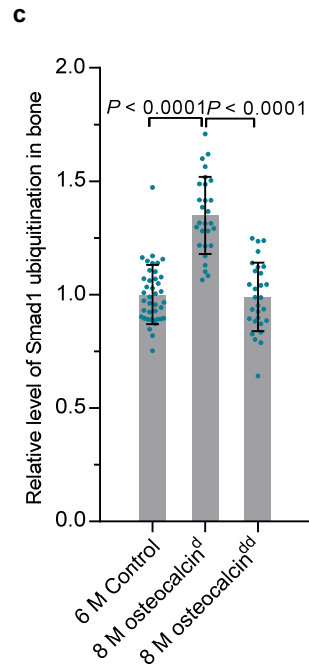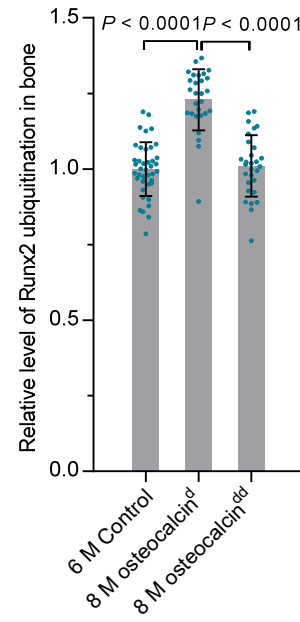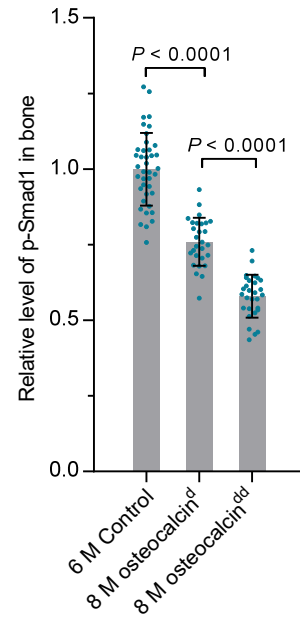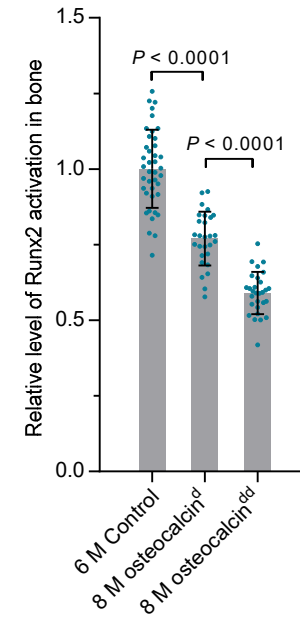



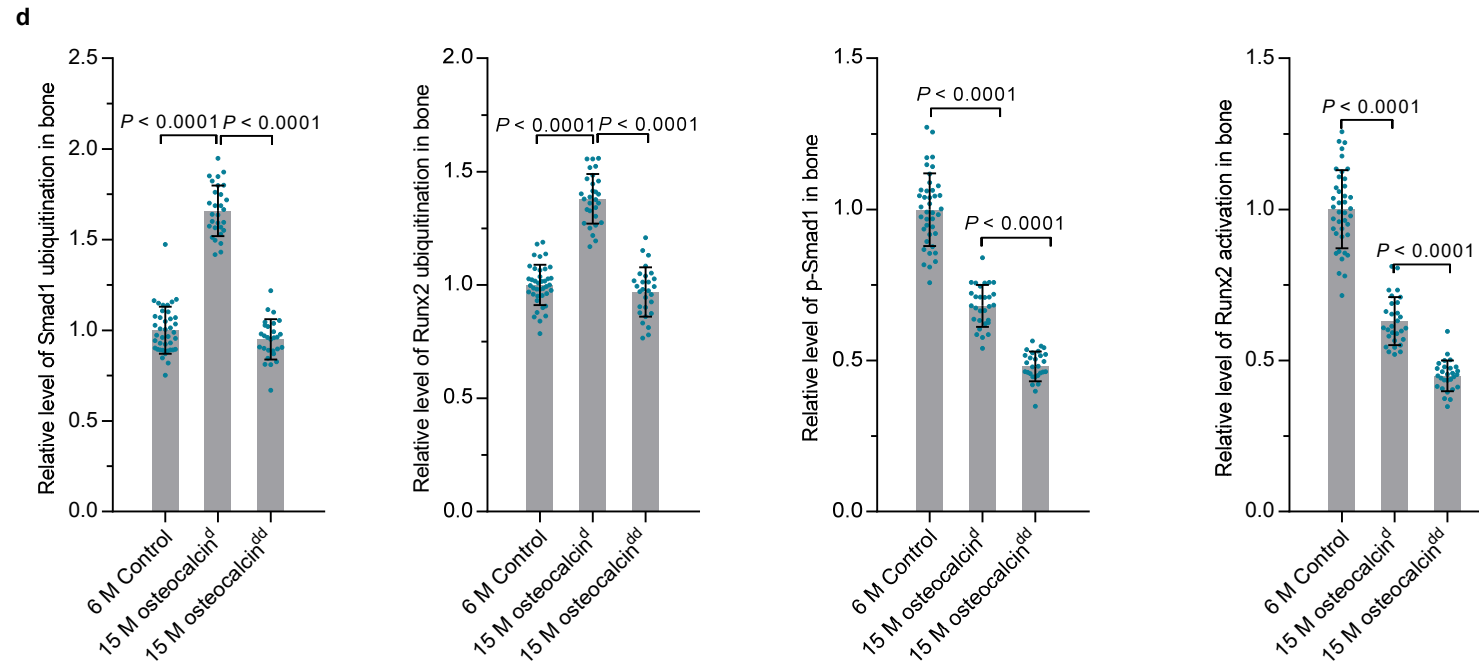

**Supplementary Figure 4. Serum osteocalcin as a biomarker in stratifying mice BMP-2<sup>n</sup>/Smurf1<sup>e</sup> and BMP-2<sup>d</sup>/Smurf1<sup>n</sup> subgroups. (a)** Relative level of serum osteocalcin in osteoporotic mice aged 8 months old ( $n = 73$ ) and 15 months old ( $n = 78$ ). Osteocalcin<sup>d</sup> subgroup (the cluster of dots between the two red dashed lines), a major subgroup with a comparable serum osteocalcin level to that in BMP-2<sup>n</sup>/Smurf1<sup>e</sup> subgroup ( $0.73 \pm 0.07$  for 8-month-old osteoporotic mice;  $0.63 \pm 0.06$  for 15-month-old osteoporotic mice); osteocalcin<sup>dd</sup> subgroup (the cluster of dots between the two blue dashed lines), another major subgroup with an equivalent serum osteocalcin level to that in BMP-2<sup>d</sup>/Smurf1<sup>n</sup> subgroup ( $0.56 \pm 0.05$  for 8-month-old osteoporotic mice;  $0.47 \pm 0.05$  for 15-month-old osteoporotic mice). **(b)** Relative levels of BMP-2 and Smurf1 activity (Smad1 bound to Smurf1) in osteocalcin<sup>d</sup> subgroup ( $n = 25$  for 8-month-old;  $n = 29$  for 15-month-old) and osteocalcin<sup>dd</sup> subgroup ( $n = 24$  for 8-month-old;  $n = 28$  for 15-month-old). **(c)** Relative levels of Smad1 and Runx2 ubiquitination, p-Smad1 and Runx2 activation in osteocalcin<sup>d</sup> subgroup ( $n = 28$ ) and osteocalcin<sup>dd</sup> subgroup ( $n = 29$ ) of 8-month-old osteoporotic mice. **(d)** Relative levels of Smad1 and Runx2 ubiquitination, p-Smad1 and Runx2 activation in osteocalcin<sup>d</sup> subgroup ( $n = 29$ ) and osteocalcin<sup>dd</sup> subgroup ( $n = 28$ ) of 15-month-old osteoporotic mice. 6-month-old female mice were OVX and left untreated for 2 months (8-month-old) or 9 months (15-month-old) to induce age-related osteoporosis. The levels of BMP-2, p-Smad1 and osteocalcin, Runx2 activation, Smad1 bound to Smurf1 and ubiquitination of Smad1 and Runx2 were normalized to the mean values of healthy adult 6-month-old mice ( $n = 40$ ). Data are mean  $\pm$  s.d. followed by one-way ANOVA with a *post-hoc* test.

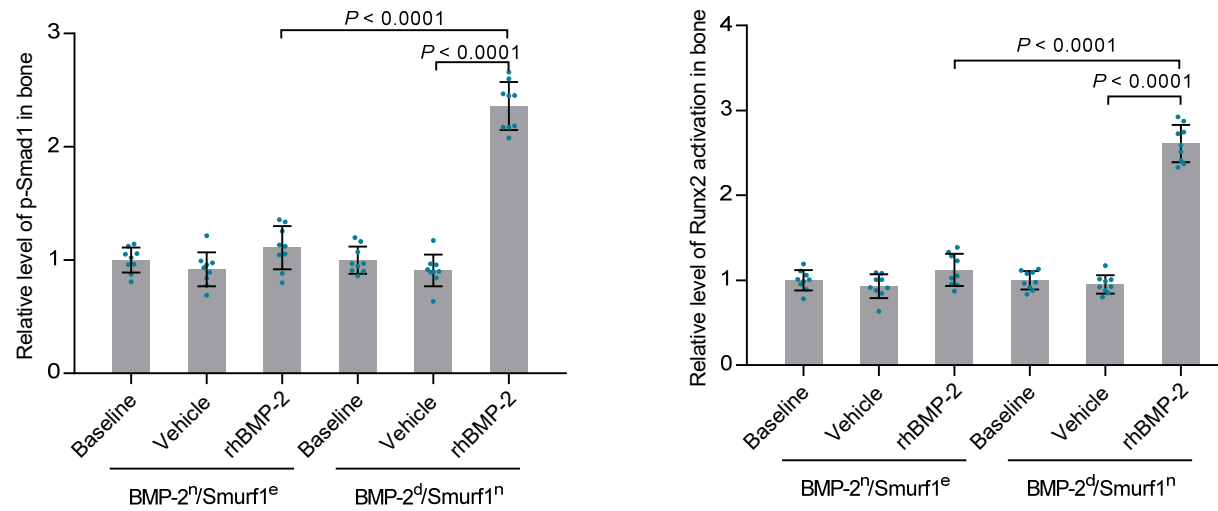

**Supplementary Figure 5. Local response to rhBMP-2 in osteoblasts from mice BMP-2<sup>n</sup>/Smurf1<sup>e</sup> and BMP-2<sup>d</sup>/Smurf1<sup>n</sup> subgroups.** Relative levels of p-Smad1 (left) and Runx2 activation (right) in osteoblasts from L4-L6 vertebrae of BMP-2<sup>n</sup>/Smurf1<sup>e</sup> and BMP-2<sup>d</sup>/Smurf1<sup>n</sup> subgroups of 15-month-old osteoporotic mice (OVX at 6 months old) with local administration of rhBMP-2 or vehicle (PBS). The levels of p-Smad1 and Runx2 activation in osteoblasts from L4-L6 vertebrae of BMP-2<sup>n</sup>/Smurf1<sup>e</sup> and BMP-2<sup>d</sup>/Smurf1<sup>n</sup> subgroups were normalized to their corresponding mean value of vehicle baseline.  $n = 9$  per group. Data are mean  $\pm$  s.d. followed by one-way ANOVA with a *post-hoc* test.

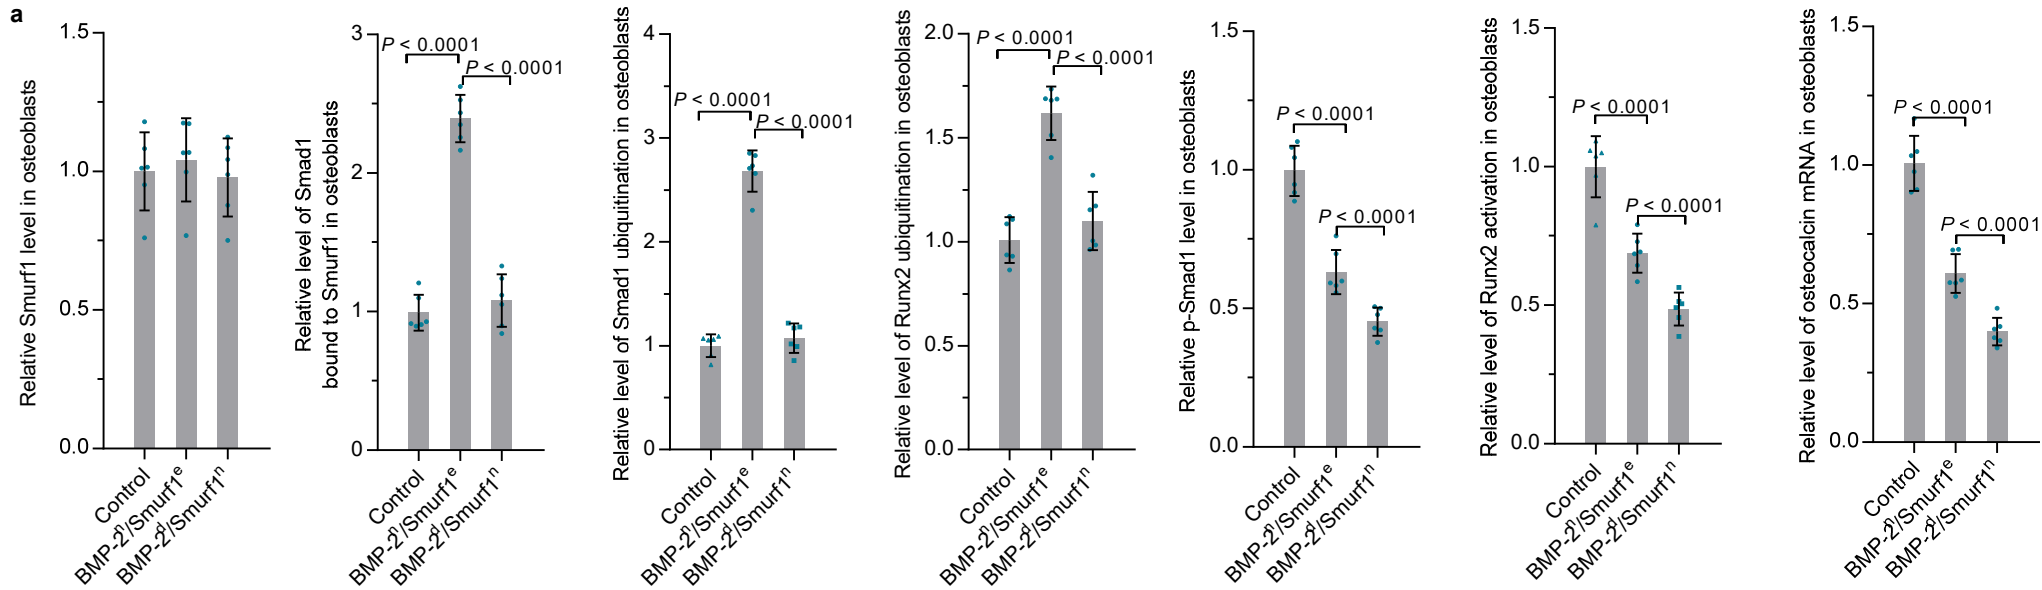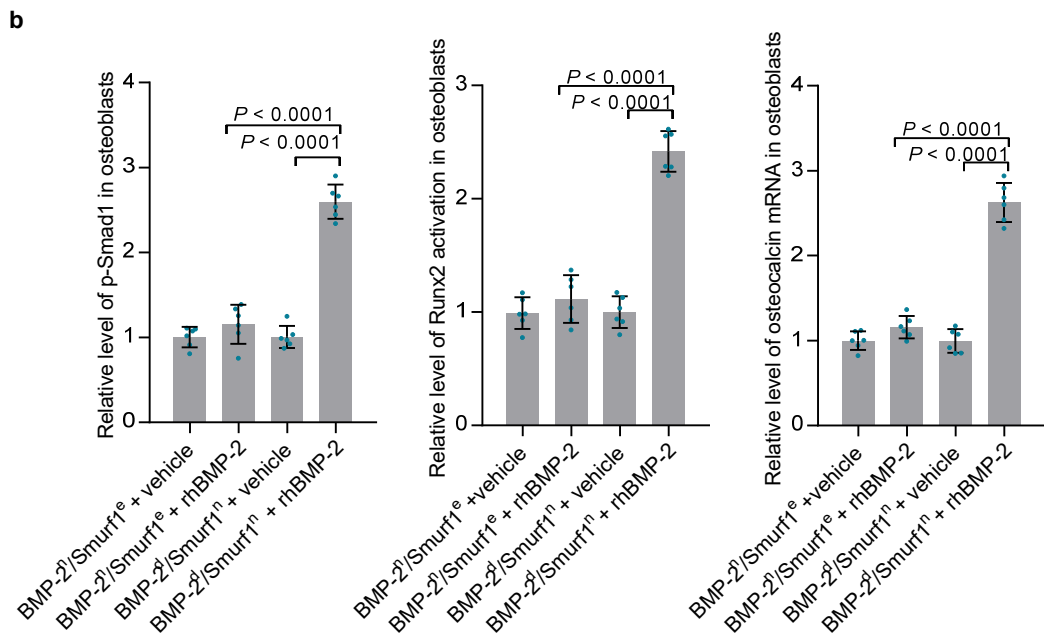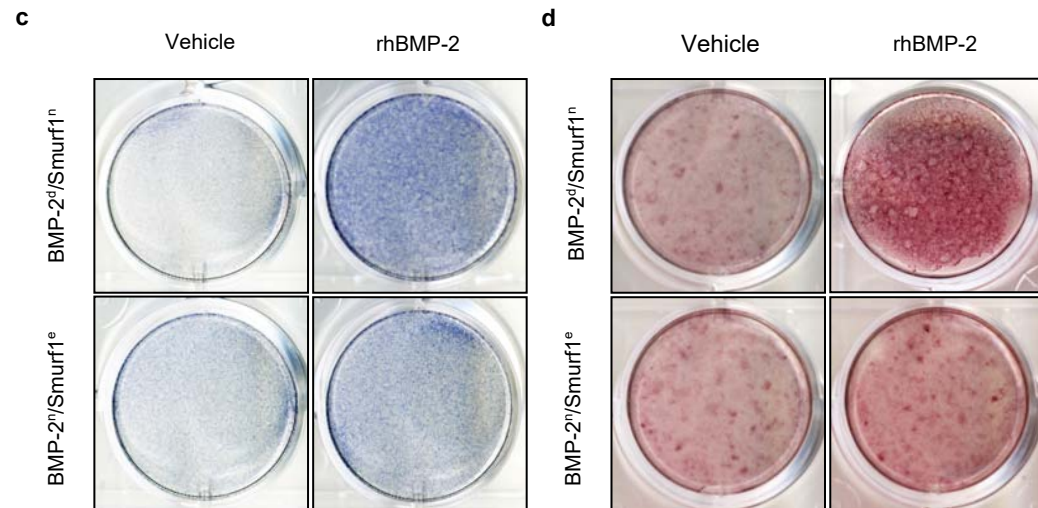

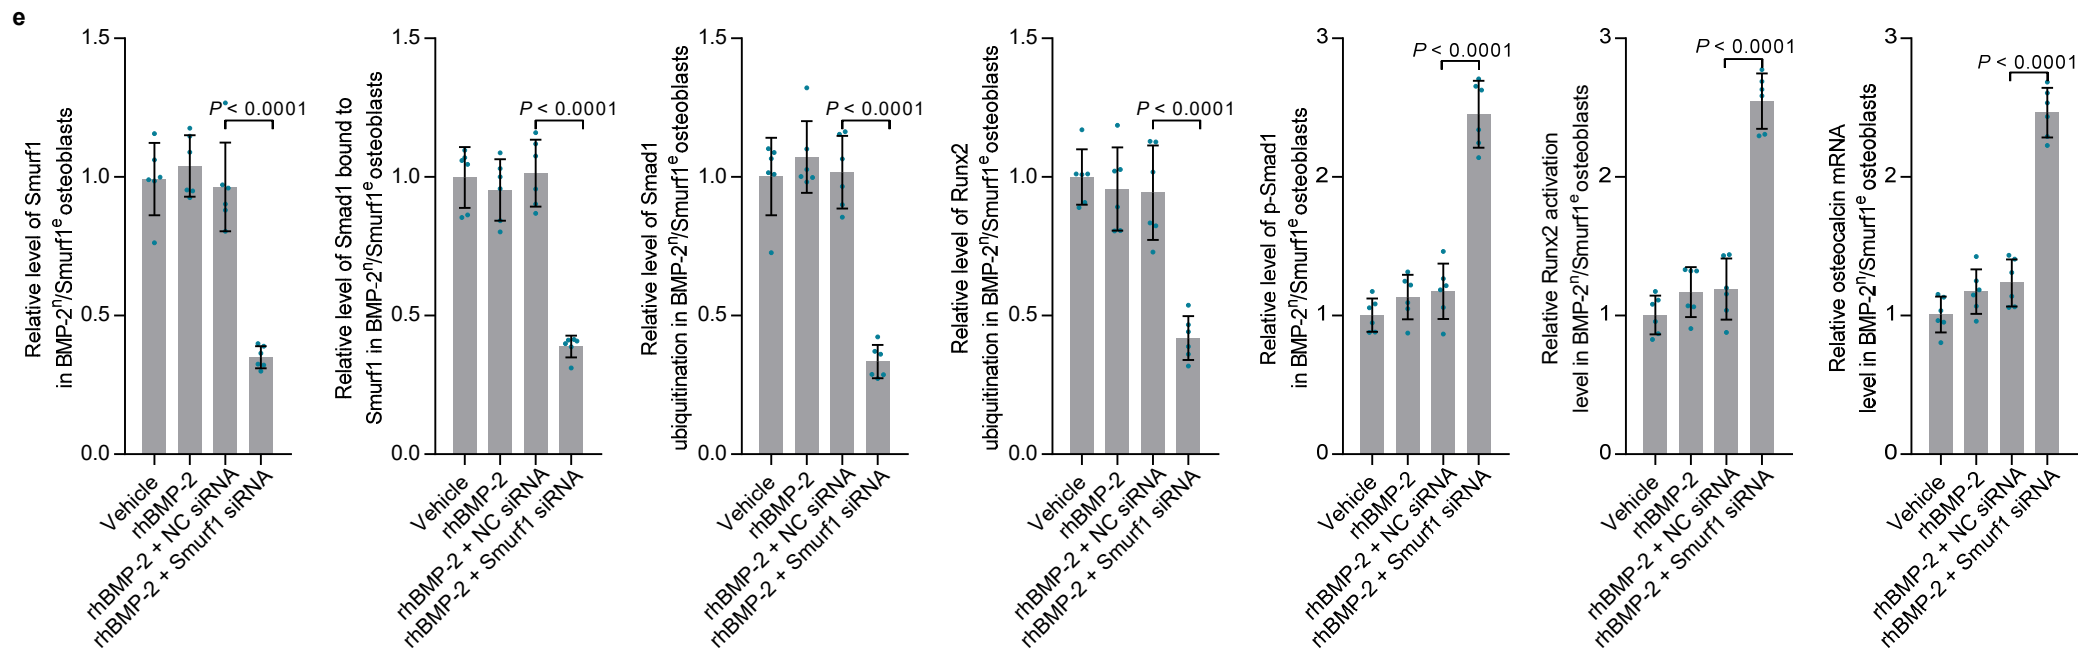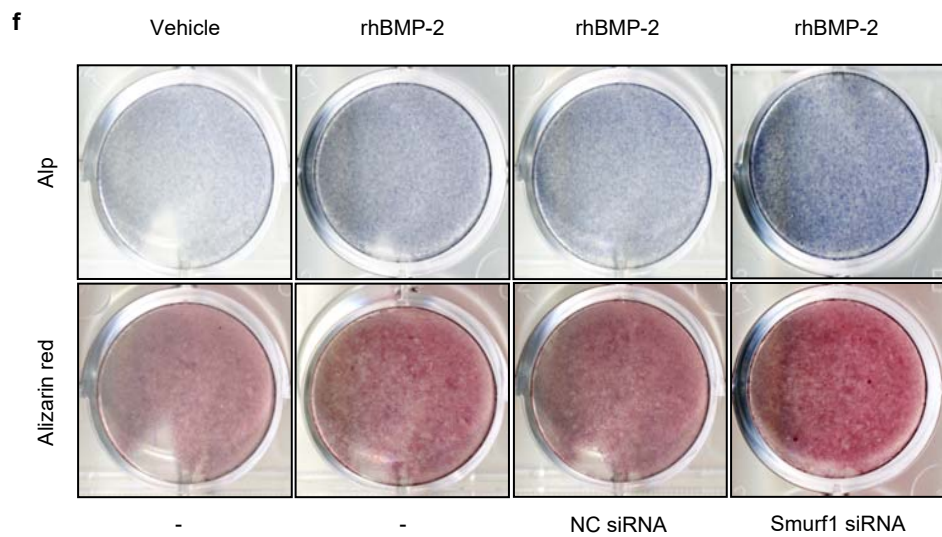

**Supplementary Figure 6. Effects of Smurf1 knockdown on BMP signaling in osteoblasts from mice BMP-2<sup>n</sup>/Smurf1<sup>e</sup> subgroup.** (a) Relative levels of Smurf1 expression, Smurf1 activity (Smad1 bound to Smurf1, ubiquitination of Smad1 and Runx2), p-Smad1, Runx2 activation and osteocalcin mRNA in osteoblasts from BMP-2<sup>n</sup>/Smurf1<sup>e</sup> and BMP-2<sup>d</sup>/Smurf1<sup>n</sup> subgroups of 15-month-old osteoporotic mice (OVX at 6 months old). The levels of Smurf1 and p-Smad1, Runx2 activation, Smad1 bound to Smurf1, ubiquitination of Smad1 and Runx2 and osteocalcin mRNA were normalized to the mean values of osteoblasts from healthy adult 6-month-old mice. (b) Relative levels of p-Smad1, Runx2 activation and osteocalcin mRNA in the above two subgroups of osteoblasts treated with rhBMP-2 or vehicle (PBS). The levels of p-Smad1 and osteocalcin mRNA in BMP-2<sup>n</sup>/Smurf1<sup>e</sup> and BMP-2<sup>d</sup>/Smurf1<sup>n</sup> subgroups were normalized to their corresponding mean values of osteoblasts treated with vehicle (PBS). (c) Alp staining showing Alp activity in the two subgroups of osteoblasts treated with 100 ng ml<sup>-1</sup> rhBMP-2 or vehicle (PBS). (d) Alizarin red staining showing mineralized nodule formation. (e) Effects of Smurf1 knockdown on relative levels of Smurf1 activity (Smad1 bound to Smurf1, ubiquitination of Smad1 and Runx2), p-Smad1, Runx2 activation and osteocalcin mRNA in osteoblasts (from BMP-2<sup>n</sup>/Smurf1<sup>e</sup> subgroup) treated with 100 ng ml<sup>-1</sup> rhBMP-2. The levels of Smurf1, Smad1 bound to Smurf1, ubiquitination of Smad1 and Runx2, p-Smad1, Runx2 activation and osteocalcin mRNA were normalized to the mean values of osteoblasts treated with vehicle (PBS). (f) Alp (upper) and alizarin red (lower) staining showing effects of Smurf1 knockdown on Alp activity and mineralized nodule formation in osteoblasts (from BMP-2<sup>n</sup>/Smurf1<sup>e</sup> subgroup) treated with 100 ng ml<sup>-1</sup> rhBMP-2. NC siRNA: non-sense siRNA. *n* = 6 per group. Data are mean ± s.d. followed by one-way ANOVA with a *post-hoc* test.



a

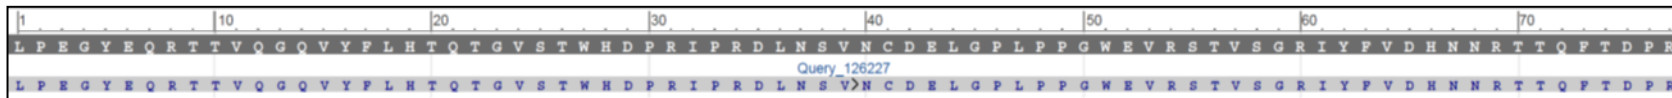

b

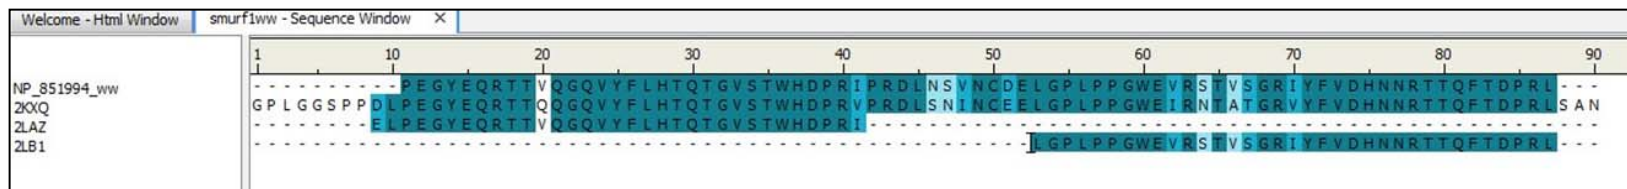

c

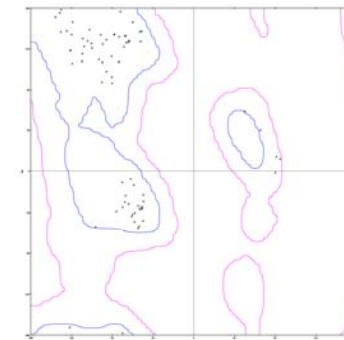

d

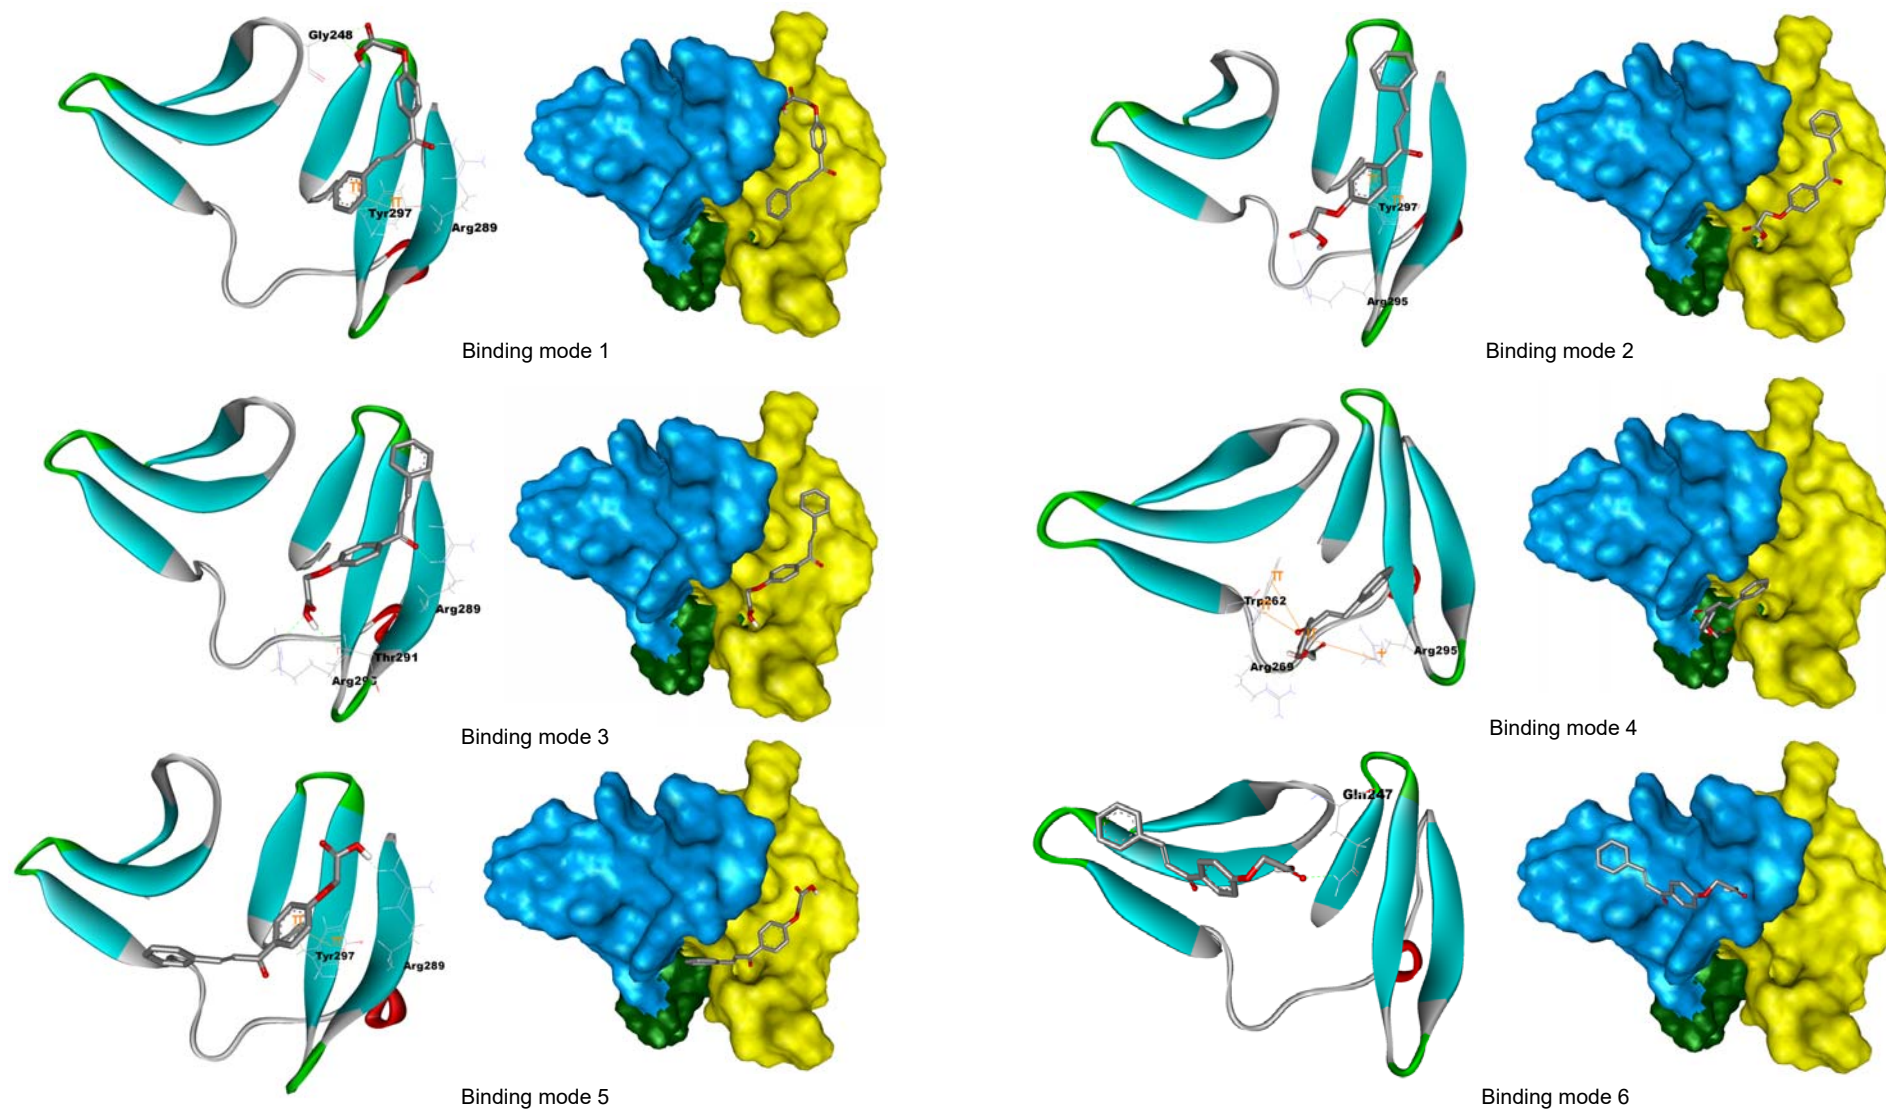

**Supplementary Figure 7. Predicted binding modes and key residues for interaction between the chalcone derivative and Smurf1 WW1-WW2 domains.** (a) Sequence alignments between human and mouse Smurf1 WW1-WW2 domains (upper, human; lower, mouse). (b) Multiple sequence alignments between Smurf1 WW1-WW2 and templates. Protein structures of Smurf2 (PDB code: 2KXQ [<https://www.rcsb.org/structure/2KXQ>]; identity: 86%), Smurf1 WW1 domain (PDB code: 2LAZ [<https://www.rcsb.org/structure/2laz>]) and Smurf1 WW2 domain (PDB code: 2LB1 [<https://www.rcsb.org/structure/2lb1>]) were used as templates. (c) Ramachandran plot of predicted structure of Smurf1 WW1-WW2. (d) 6 top-ranked binding modes with low binding energies generated by AutoDock Vina and key residues for interaction between the chalcone derivative and Smurf1 WW1-WW2 domains. For ribbon forms of the binding modes (left), the beta sheet on the left side was WW1 and the beta sheet on the right side was WW2. Linker region between WW1 and WW2 domains was shown between the two sheets. For surface views of the binding modes (right), the WW1 domain was colored in blue and the WW2 domain was colored with yellow. The linker region between WW1 and WW2 domains was colored with dark green.

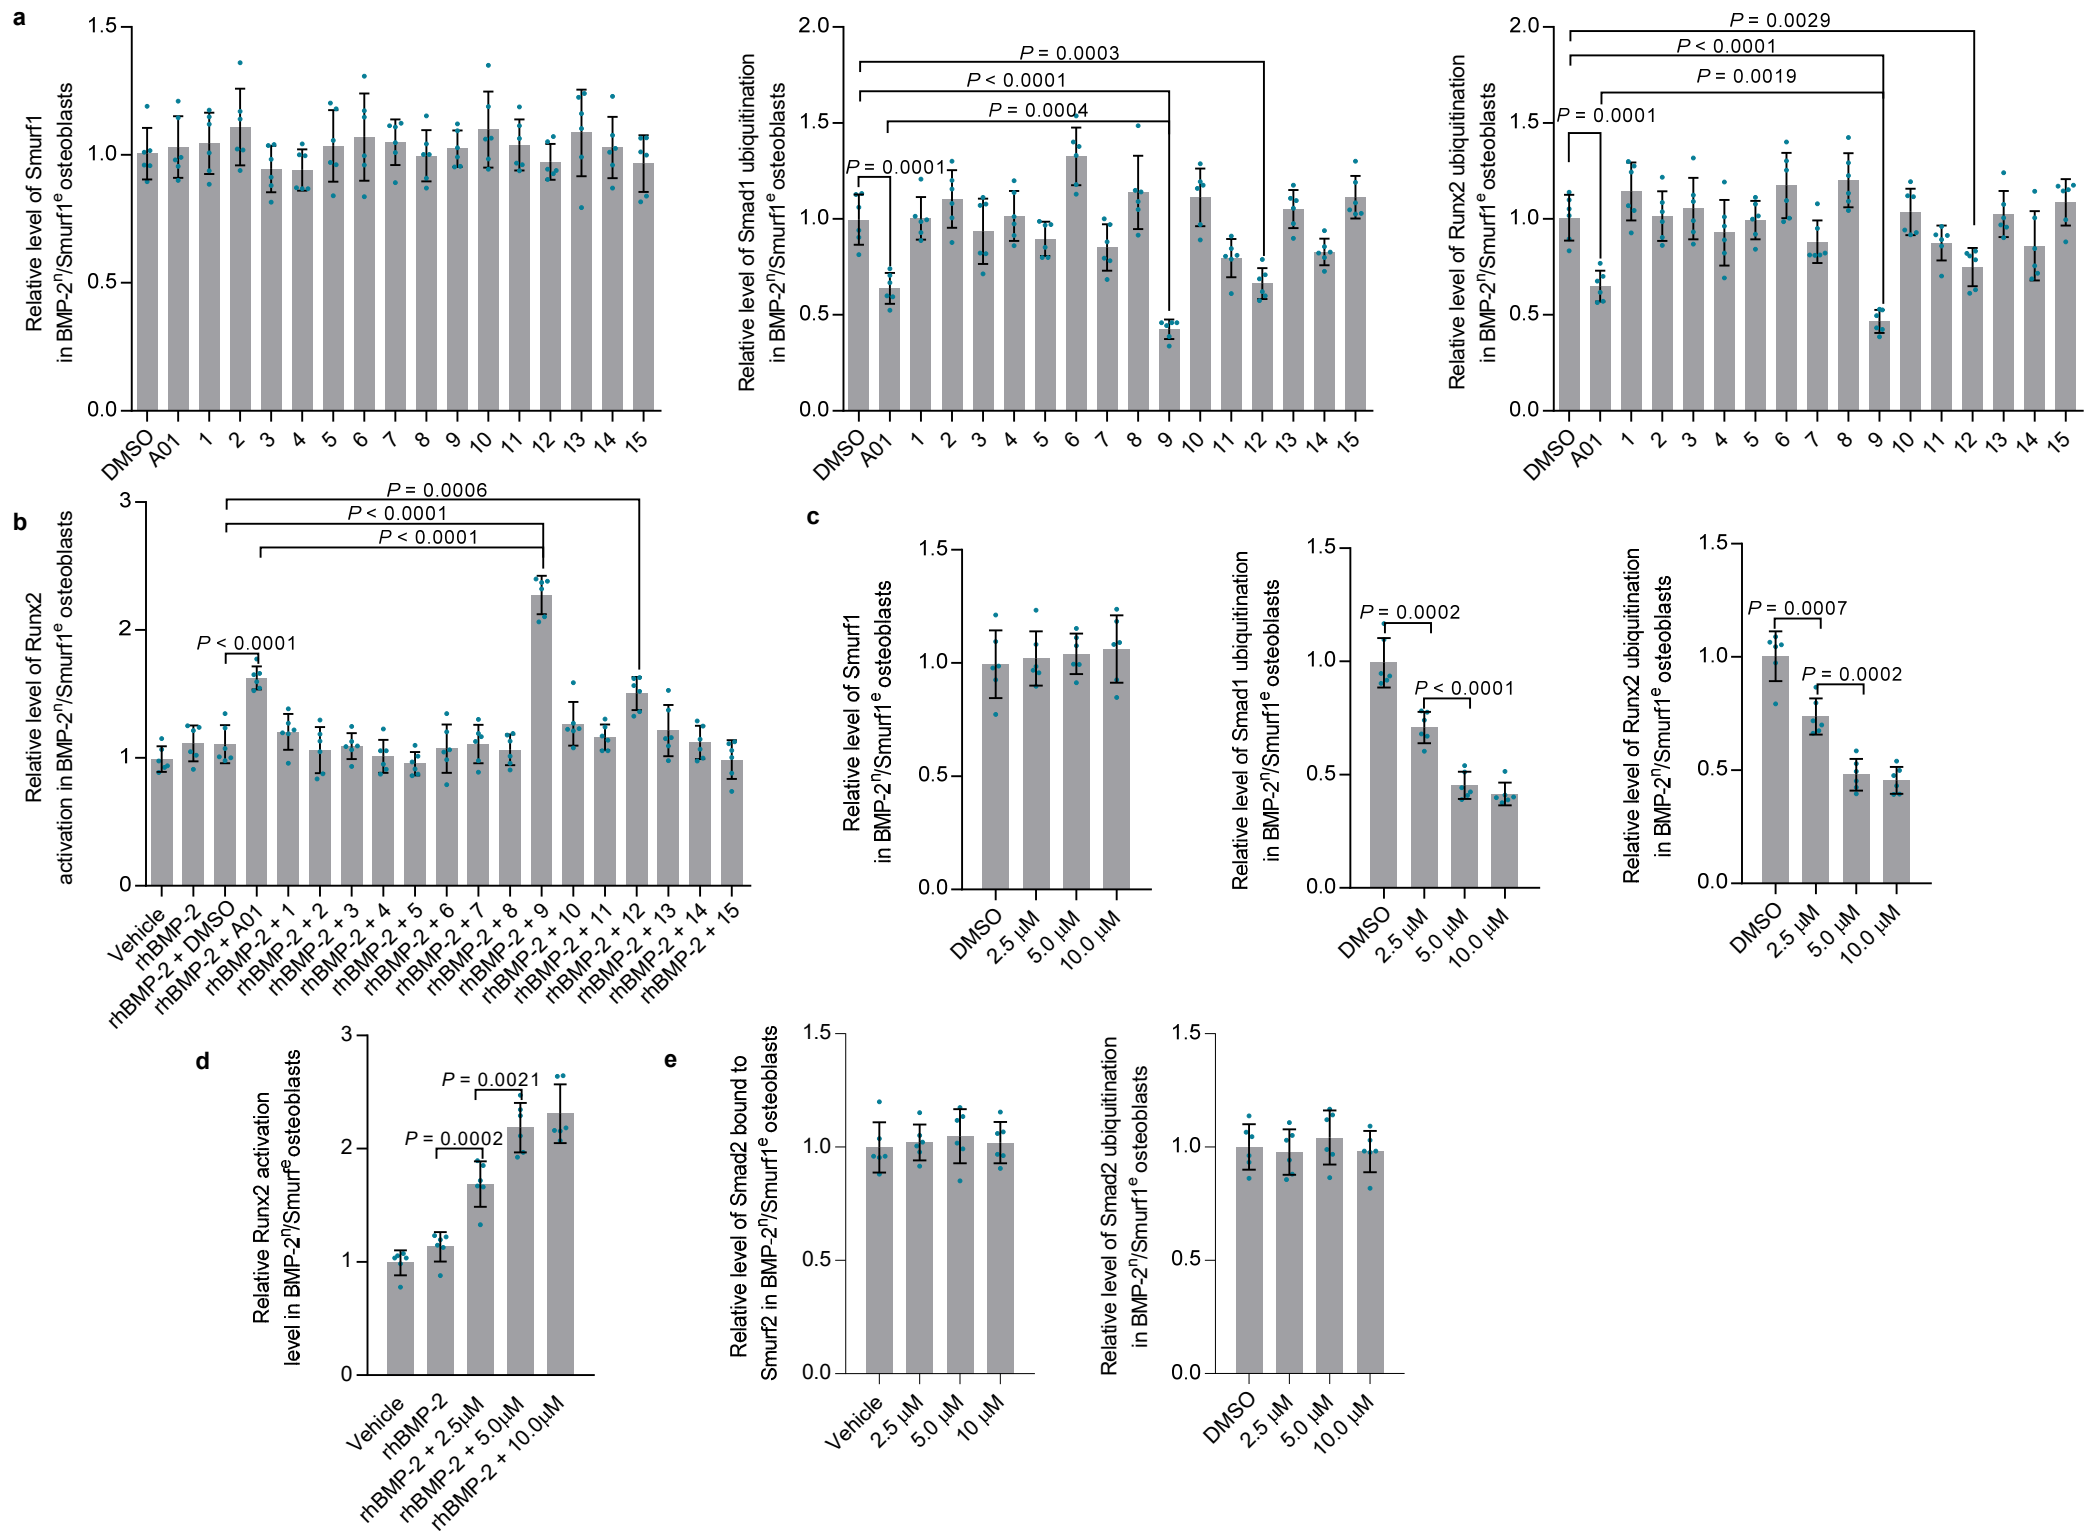



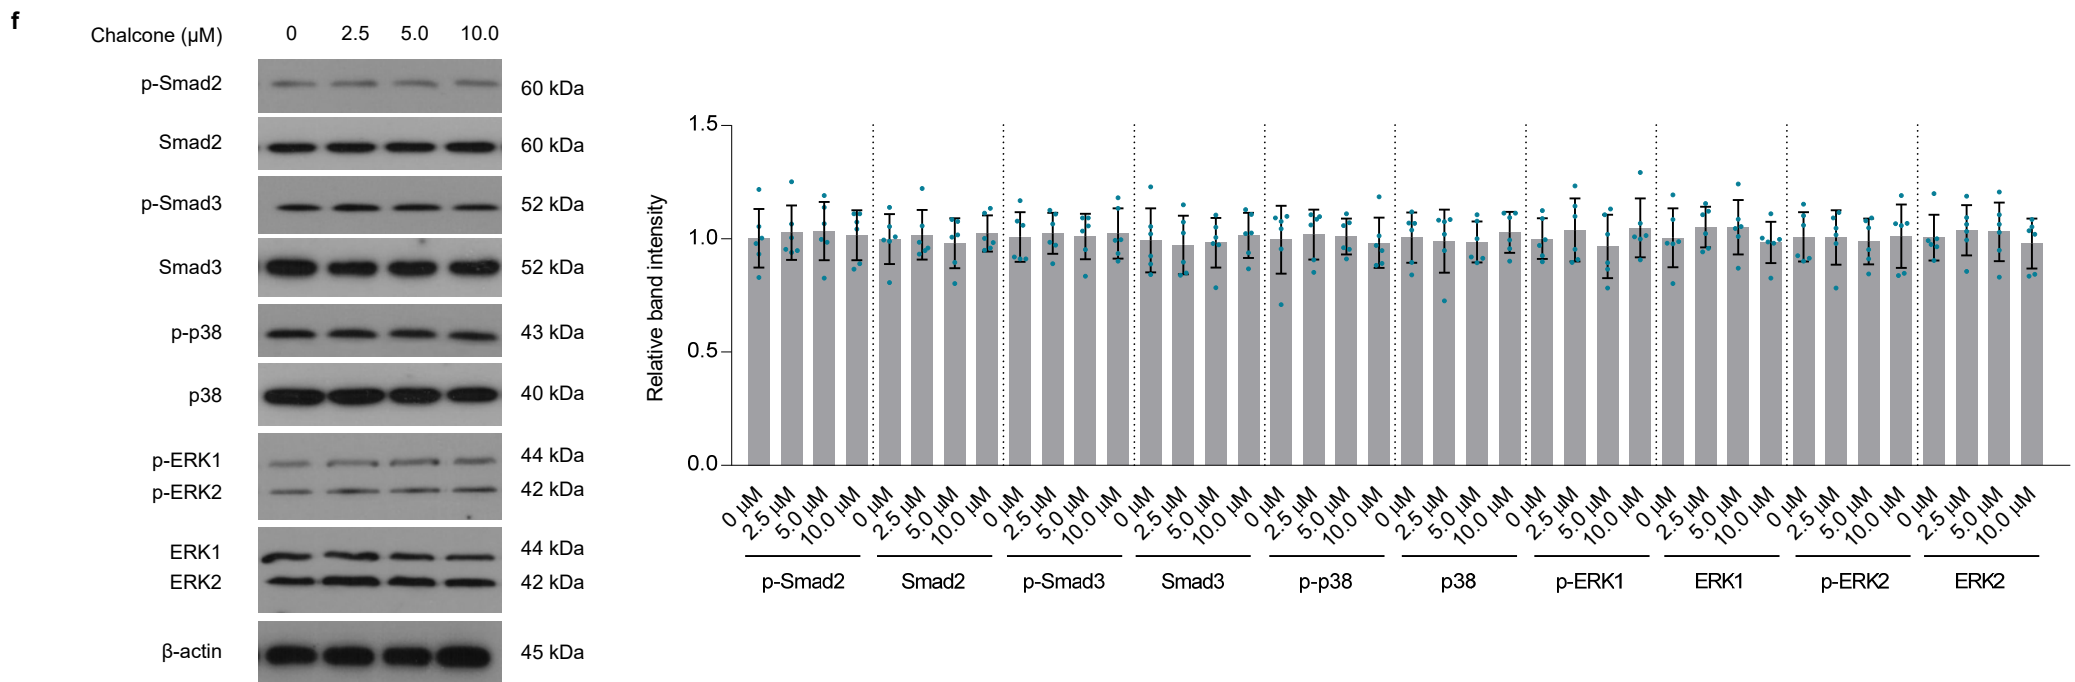

**Supplementary Figure 8. Effects of small molecules on Smurf1/2 activity, BMP/TGF- $\beta$  signaling and osteogenic differentiation in osteoblasts from mice BMP-2<sup>n</sup>/Smurf1<sup>e</sup> subgroup. (a)** Effects of the top-ranked 15 small molecules (5.0  $\mu\text{M}$ ) selected by molecular docking-based virtual screening on Smurf1 expression and Smurf1 activity (ubiquitination of Smad1 and Runx2) in osteoblasts from BMP-2<sup>n</sup>/Smurf1<sup>e</sup> subgroup of 15-month-old osteoporotic mice (OVX at 6 months old). A01, a previously reported Smurf1 inhibitor. **(b)** Effects of the top-ranked 15 small molecules (5.0  $\mu\text{M}$ ) on Runx2 activation in osteoblasts (from BMP-2<sup>n</sup>/Smurf1<sup>e</sup> subgroup) with presence of 100 ng ml<sup>-1</sup> rhBMP-2 or vehicle (PBS). **(c)** Relative level of Smurf1 expression and Smurf1 activity (ubiquitination of Smad1 and Runx2) in osteoblasts (from BMP-2<sup>n</sup>/Smurf1<sup>e</sup> subgroup) incubated with the chalcone derivative at a series of concentrations (2.5, 5.0 and 10.0  $\mu\text{M}$ ). **(d)** Relative level of Runx2 activation in osteoblasts (from BMP-2<sup>n</sup>/Smurf1<sup>e</sup> subgroup) incubated with the chalcone derivative at a series of concentrations (2.5, 5.0 and 10.0  $\mu\text{M}$ ), with the presence of 100 ng ml<sup>-1</sup> rhBMP-2 or vehicle (PBS). **(e)** Relative level of Smurf2 activity (Smad2 bound to Smurf2 and ubiquitination of Smad2) in osteoblasts (from BMP-2<sup>n</sup>/Smurf1<sup>e</sup> subgroup) incubated with the chalcone derivative at a series of concentrations (2.5, 5.0 and 10.0  $\mu\text{M}$ ). **(f)** Levels of expression and activation (phosphorylation) of downstream molecules of TGF- $\beta$ s including Smad2/3, ERK1/2 and p38 in osteoblasts (from BMP-2<sup>n</sup>/Smurf1<sup>e</sup> subgroup) incubated with the chalcone derivative at a series of concentrations (0, 2.5, 5.0 and 10.0  $\mu\text{M}$ ). Left, representative images of western blots; right, relative band intensity normalized to internal reference  $\beta$ -actin. The levels of Smurf1 expression, ubiquitination of Smad1, Smad2 and Runx2, Smad2 bound to Smurf2, Runx2 activation and osteocalcin mRNA were normalized to the mean values of osteoblasts treated with vehicle (PBS) or DMSO.  $n = 6$  per group. Data are mean  $\pm$  s.d. followed by one-way ANOVA with a *post-hoc* test.

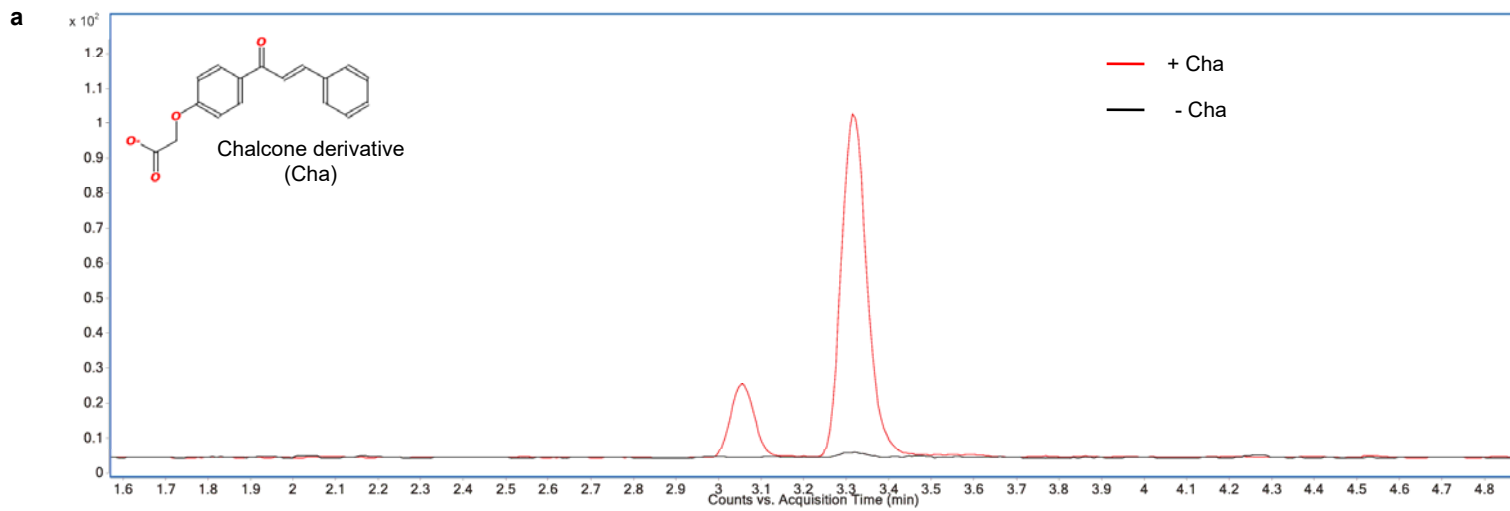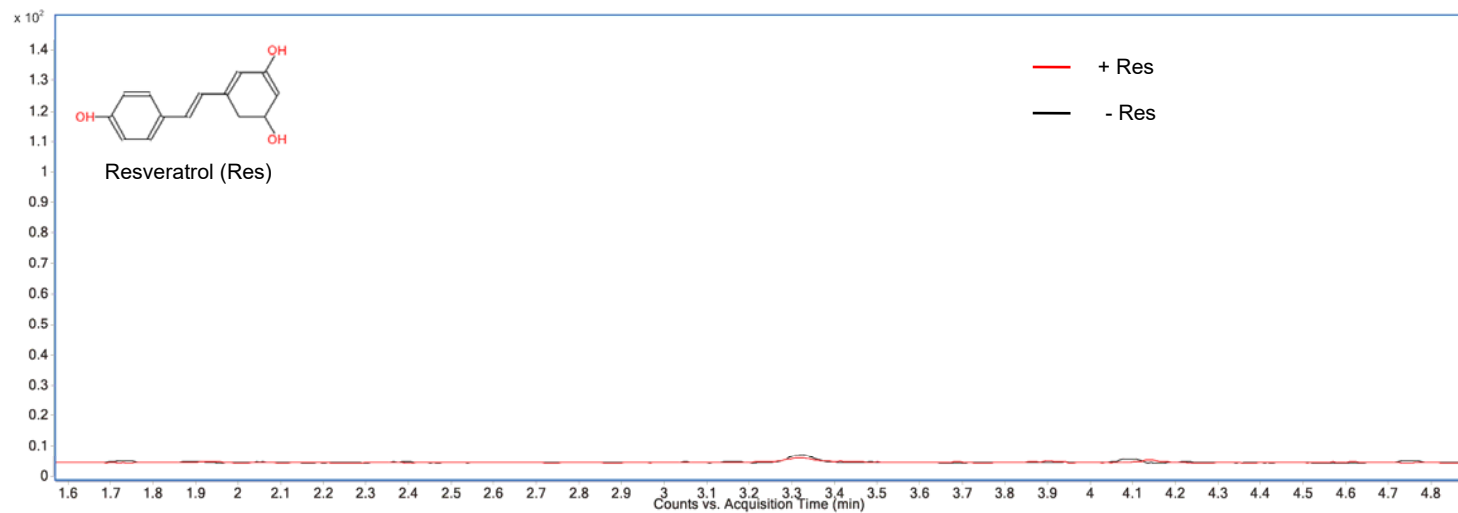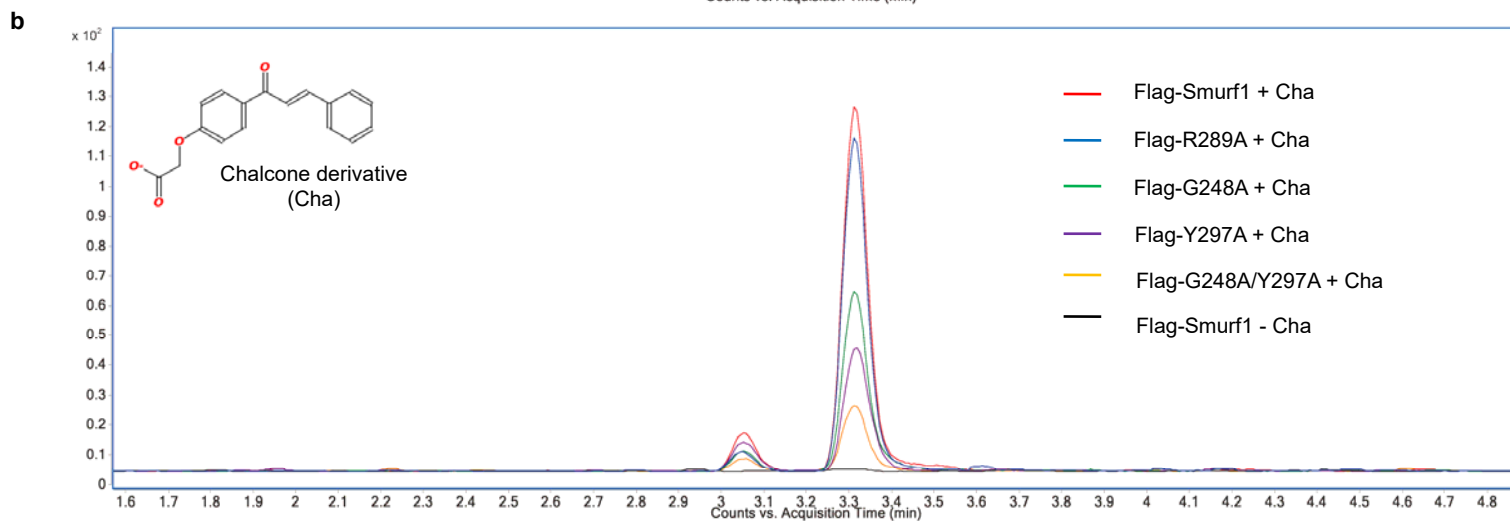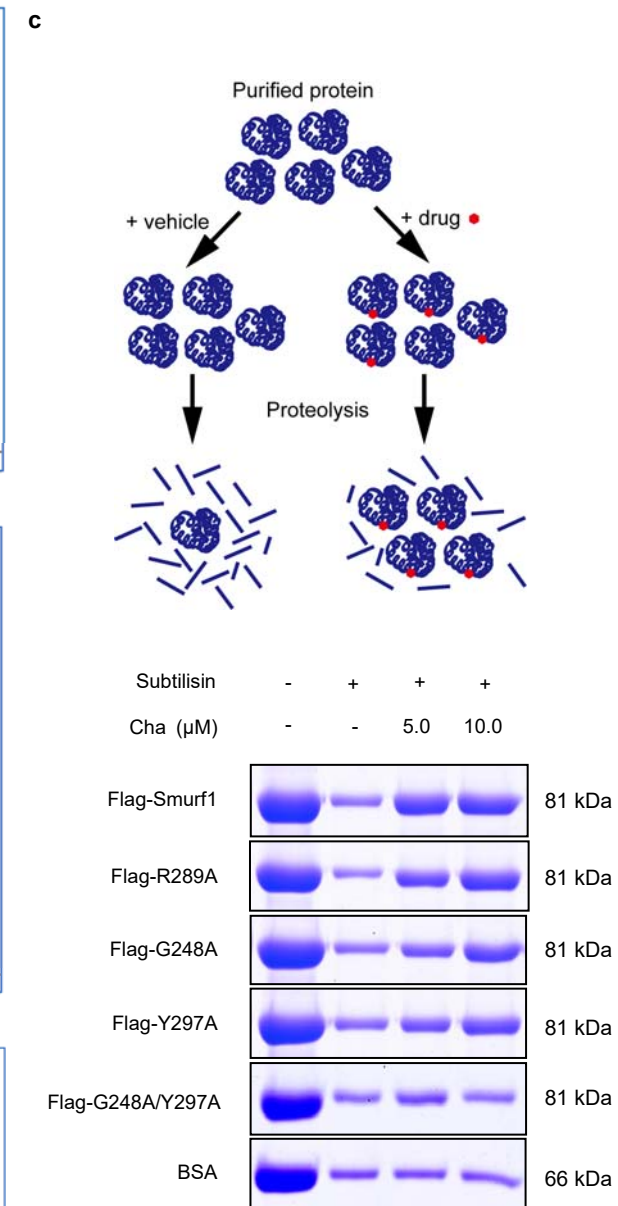

**Supplementary Figure 9. Validation of the interaction between the chalcone derivative and Smurf1.** (a) Immunoprecipitation using anti-Smurf1 antibody to examine the interaction between Smurf1 and the chalcone derivative (upper) or resveratrol (negative control; lower) in osteoblasts from BMP-2<sup>n</sup>/Smurf1<sup>e</sup> subgroup of 15-month-old osteoporotic mice (OVX at 6 months old). (b) Immunoprecipitation using anti-Flag antibody to examine the interaction between the chalcone derivative and Flag-Smurf1 wild type or mutants (R289A, G248A, Y297A and G248A/Y297A) in osteoblasts from BMP-2<sup>n</sup>/Smurf1<sup>e</sup> subgroup. The cells were transfected with pcDNA3.1-based expression vectors for Flag-Smurf1 wild type or mutants and then incubated with the chalcone derivative, resveratrol or vehicle (DMSO) before immunoprecipitation. The chalcone derivative or resveratrol in immunoprecipitates was examined by LC-MS/MS. (c) Drug affinity responsive target stability (DARTS) assay to determine binding of the chalcone derivative to Smurf1 wild type or mutants. DARTS was performed by simply treating purified Flag-Smurf1 wild type, mutants or BSA with the chalcone derivative (5.0 and 10.0 μM) or vehicle (DMSO), followed by digestion of the proteins with proteases (subtilisin) (upper). Subsequently, the samples are separated by sodium dodecyl sulfate polyacrylamide gel electrophoresis (SDS-PAGE) and stained by coomassie brilliant blue to identify protein bands that were protected from proteolysis by the chalcone derivative (lower). Cha: the chalcone derivative; Res: resveratrol.

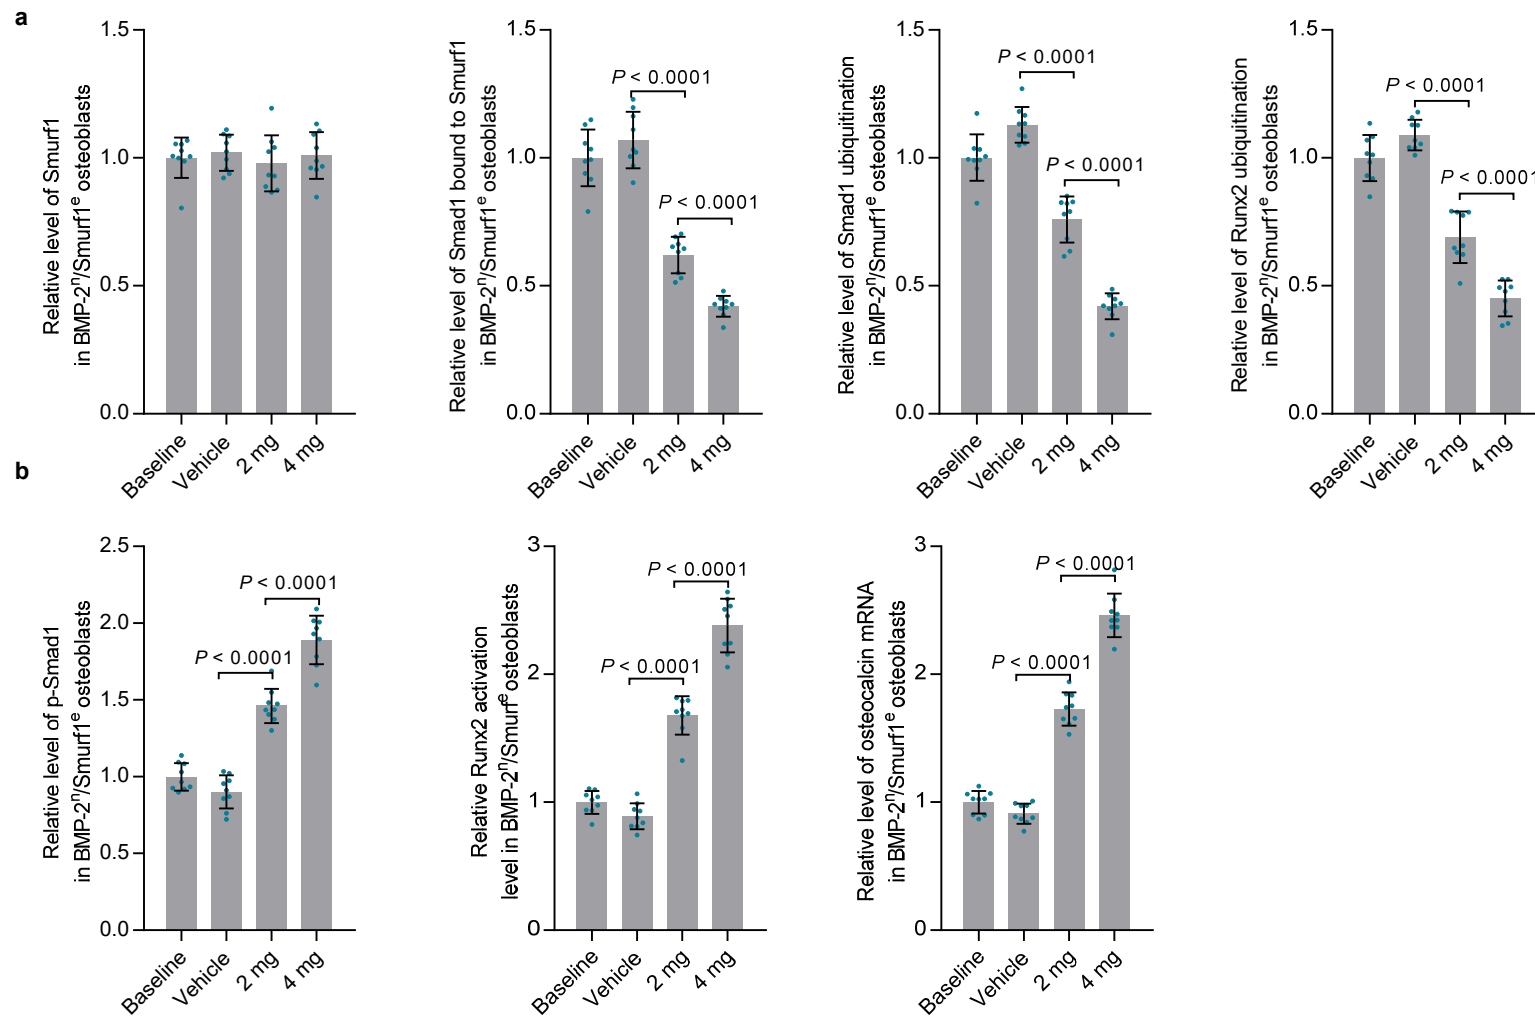

**Supplementary Figure 10. Effects of chalcone derivative on Smurf1 activity, BMP signaling and osteogenic potential in osteoblasts from mice BMP-2<sup>n</sup>/Smurf1<sup>e</sup> subgroup during spinal fusion. (a) Relative levels of Smurf1 expression and Smurf1 activity (Smad1 bound to Smurf1, ubiquitination of Smad1 and Runx2) in osteoblasts isolated from spinal fusion sites (L4-L6 vertebrae) in BMP-2<sup>n</sup>/Smurf1<sup>e</sup> subgroup of 15-month-old osteoporotic mice (OVX at 6 months old), administrated with the chalcone derivative (2 mg or 4 mg) or vehicle (DMSO). (b) Relative levels of p-Smad1, Runx2 activation and osteocalcin mRNA in the above osteoblasts. Relative levels of Smurf1 and p-Smad1, Smad1 bound to Smurf1, Runx2 activation, ubiquitination of Smad1 and Runx2 and osteocalcin mRNA were normalized to the mean values of osteoblasts from BMP-2<sup>n</sup>/Smurf1<sup>e</sup> subgroup before the spinal fusion surgery (baseline).  $n = 9$  per group. Data are mean  $\pm$  s.d. followed by one-way ANOVA with a *post-hoc* test.**

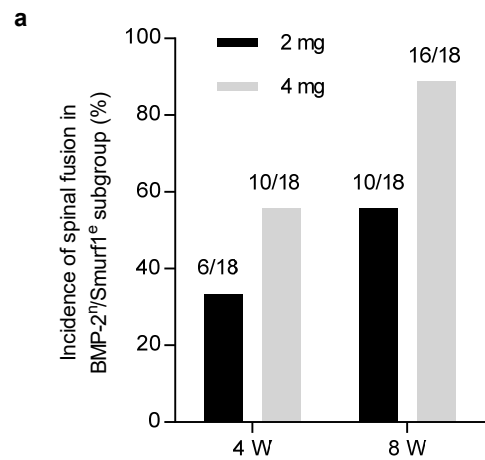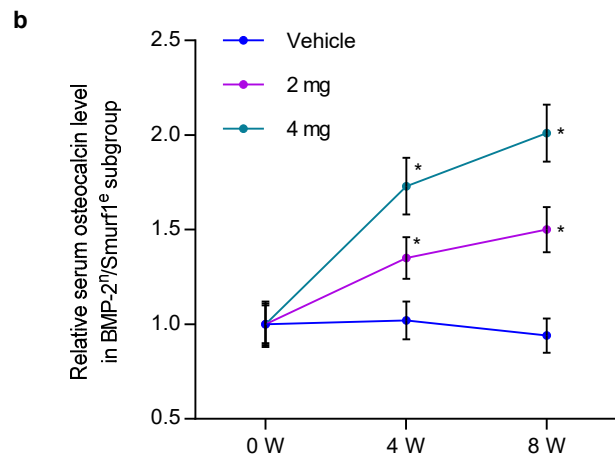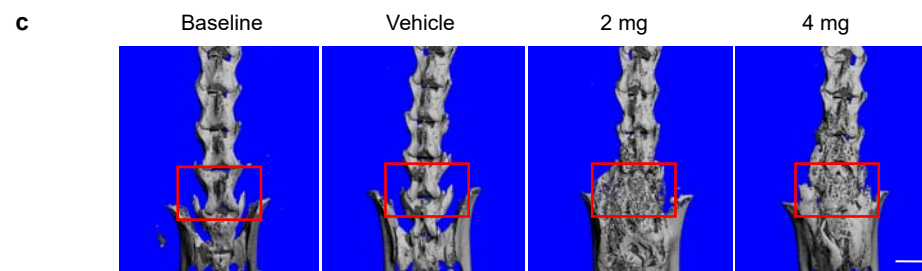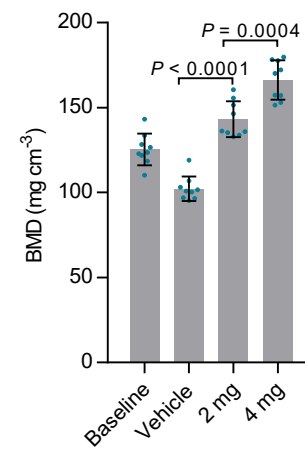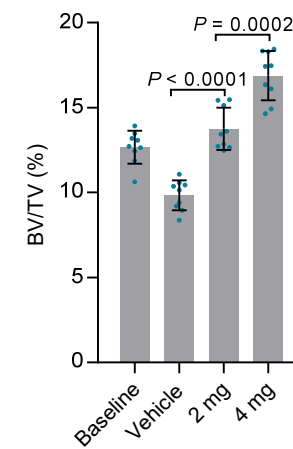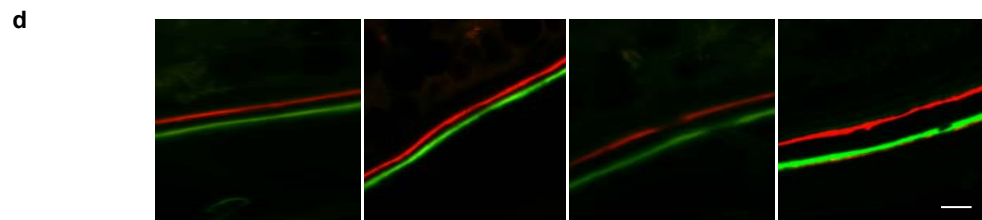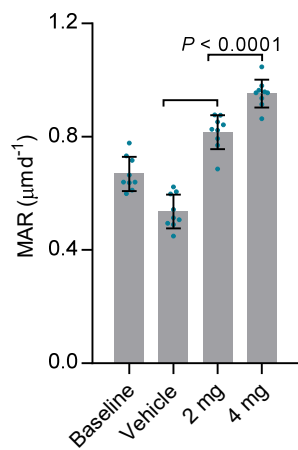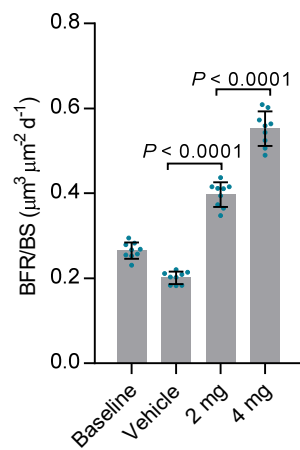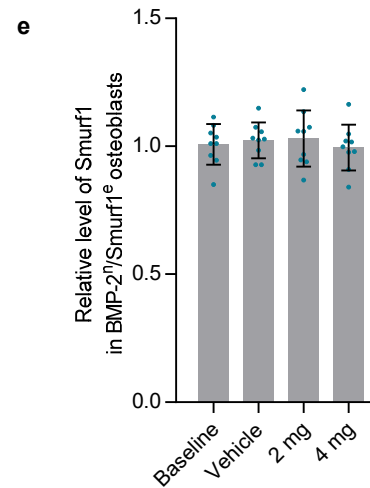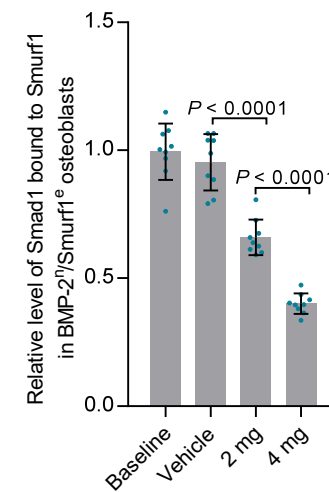

f

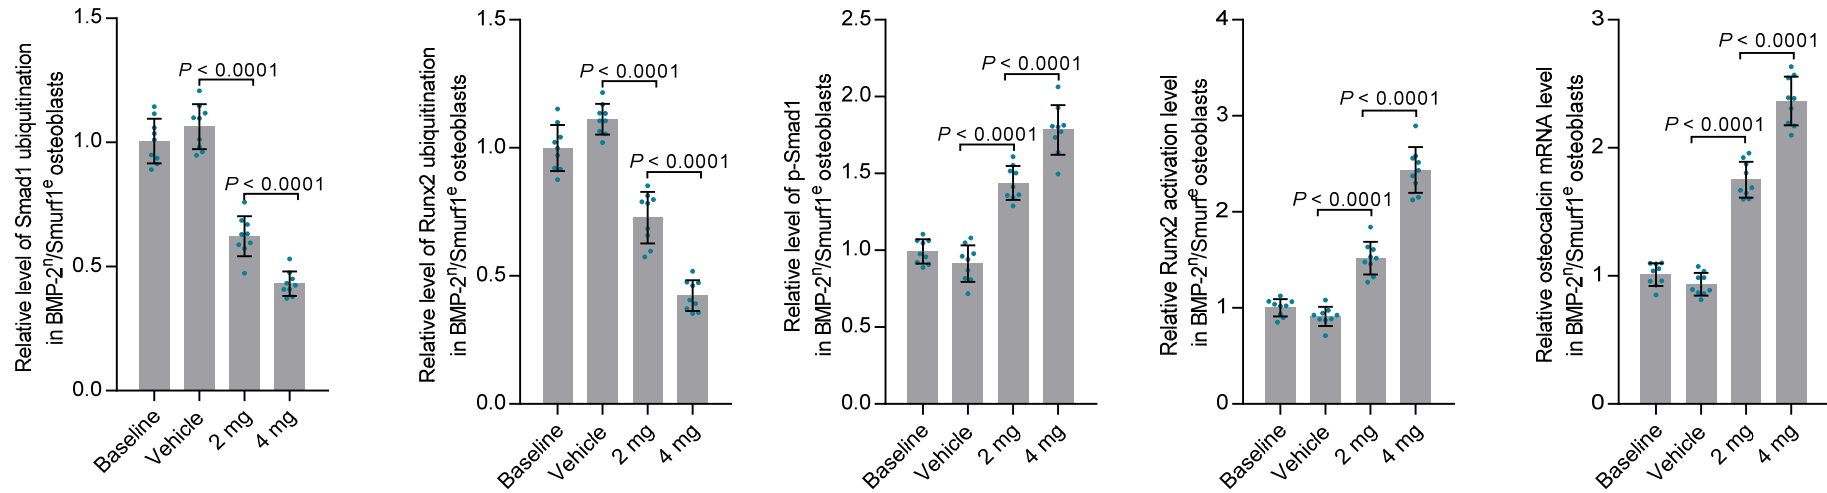

**Supplementary Figure 11. Effects of the chalcone derivative on local bone formation, Smurf1 activity and BMP signaling in mice BMP-2<sup>n</sup>/Smurf1<sup>e</sup> subgroup during spinal fusion. (a)** Manual assessment of spinal fusion incidence during local administration of the chalcone derivative (2 or 4 mg per piece of ACS bilaterally) in BMP-2<sup>n</sup>/Smurf1<sup>e</sup> subgroup of 8-month-old osteoporotic mice (OVX at 6 months old) at 4 weeks (4 W) or 8 weeks (8 W). *n* = 18 per group. Fisher's exact test was performed (*P* = 0.007 and *P* < 0.0001 for 2 mg and 4 mg versus vehicle at 4 W, respectively; *P* < 0.0001 for 2 mg or 4 mg versus vehicle at 8 W). **(b)** Relative serum osteocalcin level during local administration of the chalcone derivative or vehicle (DMSO) in mice BMP-2<sup>n</sup>/Smurf1<sup>e</sup> subgroup. The level of serum osteocalcin in BMP-2<sup>n</sup>/Smurf1<sup>e</sup> subgroup was normalized to the baseline before spinal fusion surgery. \**P* < 0.0001 for 2 mg versus vehicle or 4 mg versus 2 mg at 4 W and 8 W. **(c)** Representative microCT images (upper) and bone mass parameters (BMD and BV/TV) (bottom) in spinal fusion sites (indicated by red rectangle). Scale bars, 2.5 mm. **(d)** Representative images showing bone formation in spinal fusion sites assessed by xylenol (red) and calcein (green) labeling and analysis of dynamic bone histomorphometric parameters (MAR and BFR/BS). Scale bars, 10 μm. **(e)** Relative levels of Smurf1 expression and Smurf1 activity (Smad1 bound to Smurf1) in osteoblasts isolated from spinal fusion sites (L4-L6 vertebrae) in BMP-2<sup>n</sup>/Smurf1<sup>e</sup> subgroup of aged osteoporotic mice administrated with the chalcone derivative (2 mg or 4 mg) or vehicle (DMSO). **(f)** Relative levels of p-Smad1, Smurf1 activity (ubiquitination of Smad1 and Runx2), Runx2 activation and osteocalcin mRNA in osteoblasts isolated from spinal fusion sites (L4-L6 vertebrae) in BMP-2<sup>n</sup>/Smurf1<sup>e</sup> subgroup administrated with the chalcone derivative (2 mg or 4 mg) or vehicle (DMSO). Relative levels of Smurf1 and p-Smad1, Smad1 bound to Smurf1, Runx2 activation, ubiquitination of Smad1 and Runx2 and osteocalcin mRNA were normalized to the mean values of baseline before the spinal fusion surgery. *n* = 9 per group. Data are mean ± s.d. followed by one-way ANOVA with a *post-hoc* test.

**(a)** Manual assessment of spinal fusion incidence during local administration of the chalcone derivative (2 or 4 mg per piece of ACS bilaterally) in BMP-2<sup>n</sup>/Smurf1<sup>e</sup> subgroup of 8-month-old osteoporotic mice (OVX at 6 months old) at 4 weeks (4 W) or 8 weeks (8 W). *n* = 18 per group. Fisher's exact test was performed (*P* = 0.007 and *P* < 0.0001 for 2 mg and 4 mg versus vehicle at 4 W, respectively; *P* < 0.0001 for 2 mg or 4 mg versus vehicle at 8 W). **(b)** Relative serum osteocalcin level during local administration of the chalcone derivative or vehicle (DMSO) in mice BMP-2<sup>n</sup>/Smurf1<sup>e</sup> subgroup. The level of serum osteocalcin in BMP-2<sup>n</sup>/Smurf1<sup>e</sup> subgroup was normalized to the baseline before spinal fusion surgery. \**P* < 0.0001 for 2 mg versus vehicle or 4 mg versus 2 mg at 4 W and 8 W. **(c)** Representative microCT images (upper) and bone mass parameters (BMD and BV/TV) (bottom) in spinal fusion sites (indicated by red rectangle). Scale bars, 2.5 mm. **(d)** Representative images showing bone formation in spinal fusion sites assessed by xylenol (red) and calcein (green) labeling and analysis of dynamic bone histomorphometric parameters (MAR and BFR/BS). Scale bars, 10 μm. **(e)** Relative levels of Smurf1 expression and Smurf1 activity (Smad1 bound to Smurf1) in osteoblasts isolated from spinal fusion sites (L4-L6 vertebrae) in BMP-2<sup>n</sup>/Smurf1<sup>e</sup> subgroup of aged osteoporotic mice administrated with the chalcone derivative (2 mg or 4 mg) or vehicle (DMSO). **(f)** Relative levels of p-Smad1, Smurf1 activity (ubiquitination of Smad1 and Runx2), Runx2 activation and osteocalcin mRNA in osteoblasts isolated from spinal fusion sites (L4-L6 vertebrae) in BMP-2<sup>n</sup>/Smurf1<sup>e</sup> subgroup administrated with the chalcone derivative (2 mg or 4 mg) or vehicle (DMSO). Relative levels of Smurf1 and p-Smad1, Smad1 bound to Smurf1, Runx2 activation, ubiquitination of Smad1 and Runx2 and osteocalcin mRNA were normalized to the mean values of baseline before the spinal fusion surgery. *n* = 9 per group. Data are mean ± s.d. followed by one-way ANOVA with a *post-hoc* test.

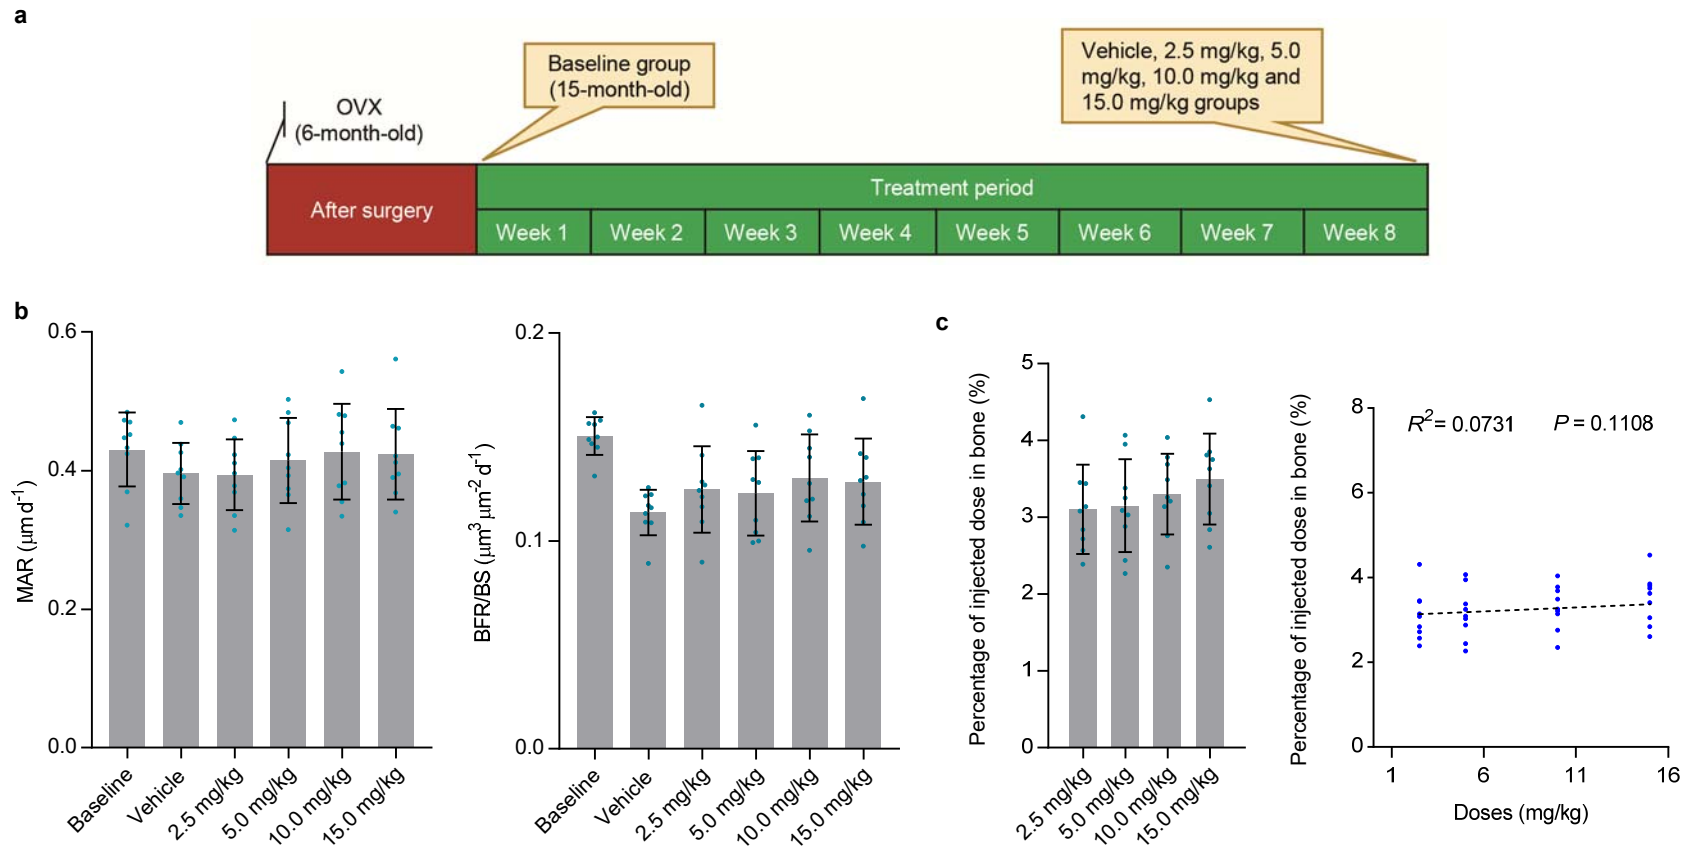

**Supplementary Figure 12. Systemic bone anabolic action and intraosseous accumulation of the chalcone derivative in BMP-2<sup>n</sup>/Smurf1<sup>e</sup> mice. (a)** A schematic diagram illustrating the experimental design. **(b)** Analysis of dynamic bone histomorphometric parameters (MAR and BFR/BS) at the proximal tibia in BMP-2<sup>n</sup>/Smurf1<sup>e</sup> subgroup of 15-month-old osteoporotic mice (OVX at 6 months old) with intravenously administration of the chalcone derivative at a series of doses (2.5, 5.0, 10.0 and 15.0 mg kg<sup>-1</sup>) or vehicle (DMSO). **(c)** Intraosseous accumulation of the chalcone derivative (left) and correlation analysis of Intraosseous accumulation of the chalcone derivative with the injected doses (right). Amount of the chalcone derivative in bone tissues was normalized to the injected dose.  $n = 9$  per group. Data are mean  $\pm$  s.d. followed by one-way ANOVA with a *post-hoc* test.

**Model Summary**

| Model | <i>R</i>           | <i>R</i> Square | Adjusted <i>R</i> Square | Std. Error of the Estimate |
|-------|--------------------|-----------------|--------------------------|----------------------------|
| 1     | 0.771 <sup>a</sup> | 0.595           | 0.571                    | 0.039872                   |

a. Predictors: (Constant), Accumulation, Dose

**ANOVA<sup>a</sup>**

| Model |            | Sum of Squares | <i>df</i> | Mean Square | <i>F</i> | Sig.               |
|-------|------------|----------------|-----------|-------------|----------|--------------------|
| 1     | Regression | 0.077          | 2         | 0.039       | 24.246   | 0.000 <sup>b</sup> |
|       | Residual   | 0.052          | 33        | 0.002       |          |                    |
|       | Total      | 0.130          | 35        |             |          |                    |

a. Dependent Variable: MAR

b. Predictors: (Constant), Accumulation, Dose

**Coefficients<sup>a</sup>**

| Model |              | Unstandardized Coefficients |            | Standardized Coefficients | <i>t</i> | Sig.  |
|-------|--------------|-----------------------------|------------|---------------------------|----------|-------|
|       |              | <i>B</i>                    | Std. Error | Beta                      |          |       |
| 1     | (Constant)   | 0.148                       | 0.039      |                           | 3.785    | 0.001 |
|       | Dose         | 0.000                       | 0.001      | -0.036                    | -0.311   | 0.758 |
|       | Accumulation | 0.083                       | 0.012      | 0.780                     | 6.782    | 0.000 |

a. Dependent Variable: MAR

**Supplementary Figure 13. Association of the injected doses or bone accumulation of the chalcone derivative with MAR.** A multiple linear regression analysis was used to determine the association of the injected doses or bone accumulation of the chalcone derivative with MAR in BMP-2<sup>n</sup>/Smurf1<sup>e</sup> subgroup of 15-month-old osteoporotic mice (OVX at 6-months old) intravenously administered with the chalcone derivative at a series of doses (2.5, 5.0, 10.0 and 15.0 mg kg<sup>-1</sup>). Dependent Variable: MAR; Predictors: bone accumulation and injected doses of the chalcone derivative.



**a**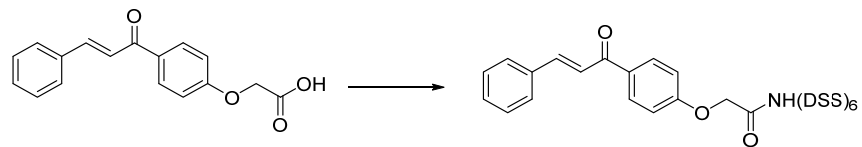**b**

Measurement: Peak Area      Run Time: 10min  
 Calculation Type: Percent      Wavelength : 220nm  
 Flow Rate : 1ml/min      Inj.Vol: 10uL  
 Buffer A : 0.1% TFA in water      Buffer B: 0.1%TFA in Acetonitrile  
 Column: Kromasil 100-5C18,4.6mmX250mm,5 micron      Column Temp: 25°C  
 Gradient(linear): 35%-60% buffer B in 10min

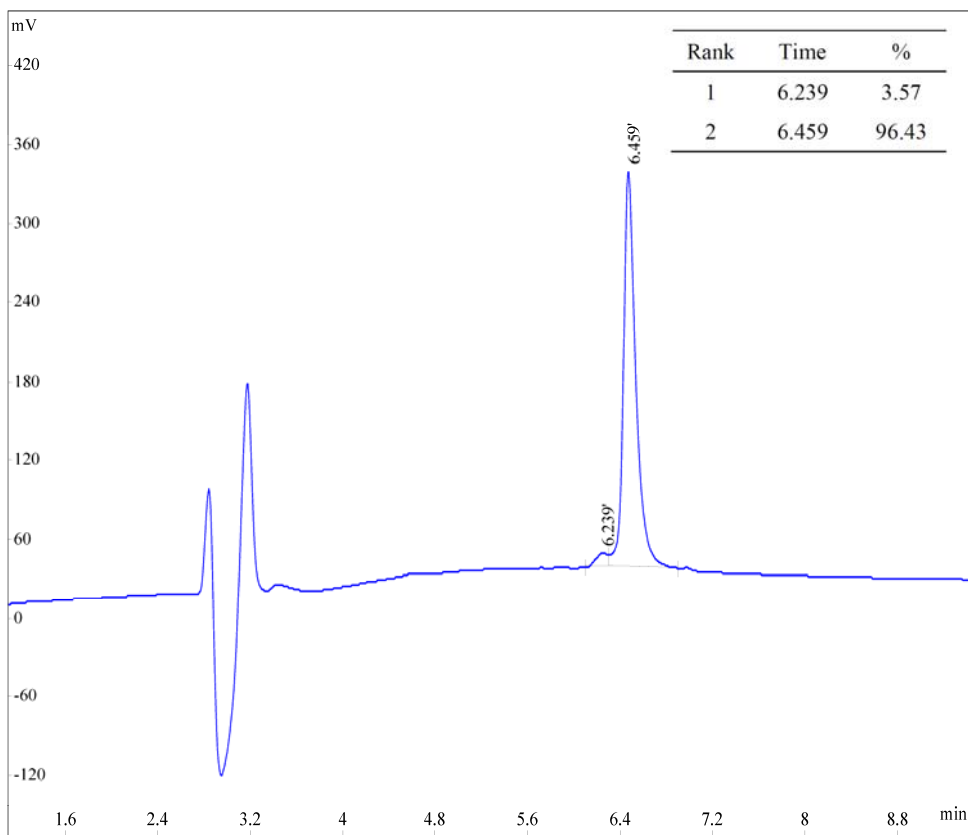**c**

Expected MS: 2017.59      Mass Spectrometer: API 150EX  
 Ion Source: ESI      B.conc: 75%ACN/24.5%H<sub>2</sub>O/0.5%Ac  
 NEB:10.00      CUR:12.00      IS:-4500      TEM:0.00  
 Flow Rate : 0.2ml/min      Run Time: 1min

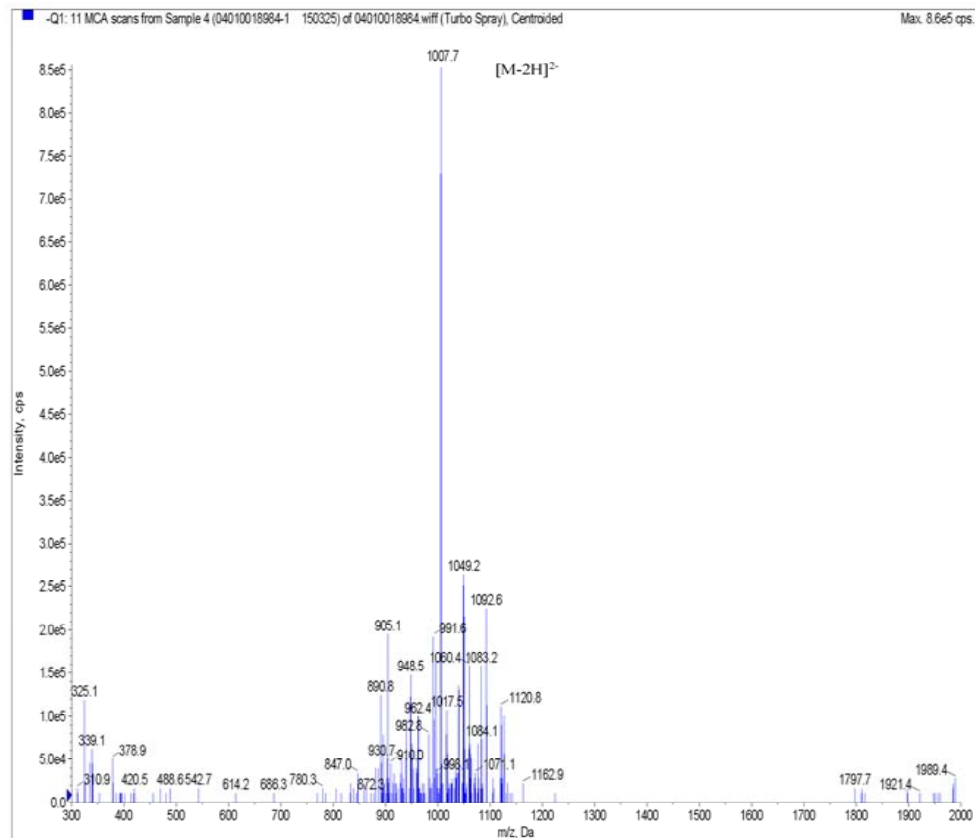

**Supplementary Figure 14. Synthesis and identification of (DSS)<sub>6</sub>-chalcone derivative conjugate.** **(a)** Synthesis of (DSS)<sub>6</sub>-chalcone derivative conjugate by an amide bond formed via a reaction between the carboxyl group of the chalcone derivative and the amino group of (DSS)<sub>6</sub>. (DSS)<sub>6</sub> are six repetitive sequences of aspartate-serine-serine. **(b)** Identification of (DSS)<sub>6</sub>-chalcone derivative conjugate by reverse phase high performance liquid chromatography (RP-HPLC). The retention time was 6.459 min and the purity were 96.43%. **(c)** Identification of (DSS)<sub>6</sub>-chalcone derivative conjugate by electrospray ionisation mass spectrometry (ESI-MS). The MS determined the m/z value, that was the molecular weight divided by the charge. Due to the formation of [M-2H]<sup>2-</sup> ions, the detected molecule weight (1007.7) was half of the real molecular weight, which was consistent with the expected molecule weight (2017.59).

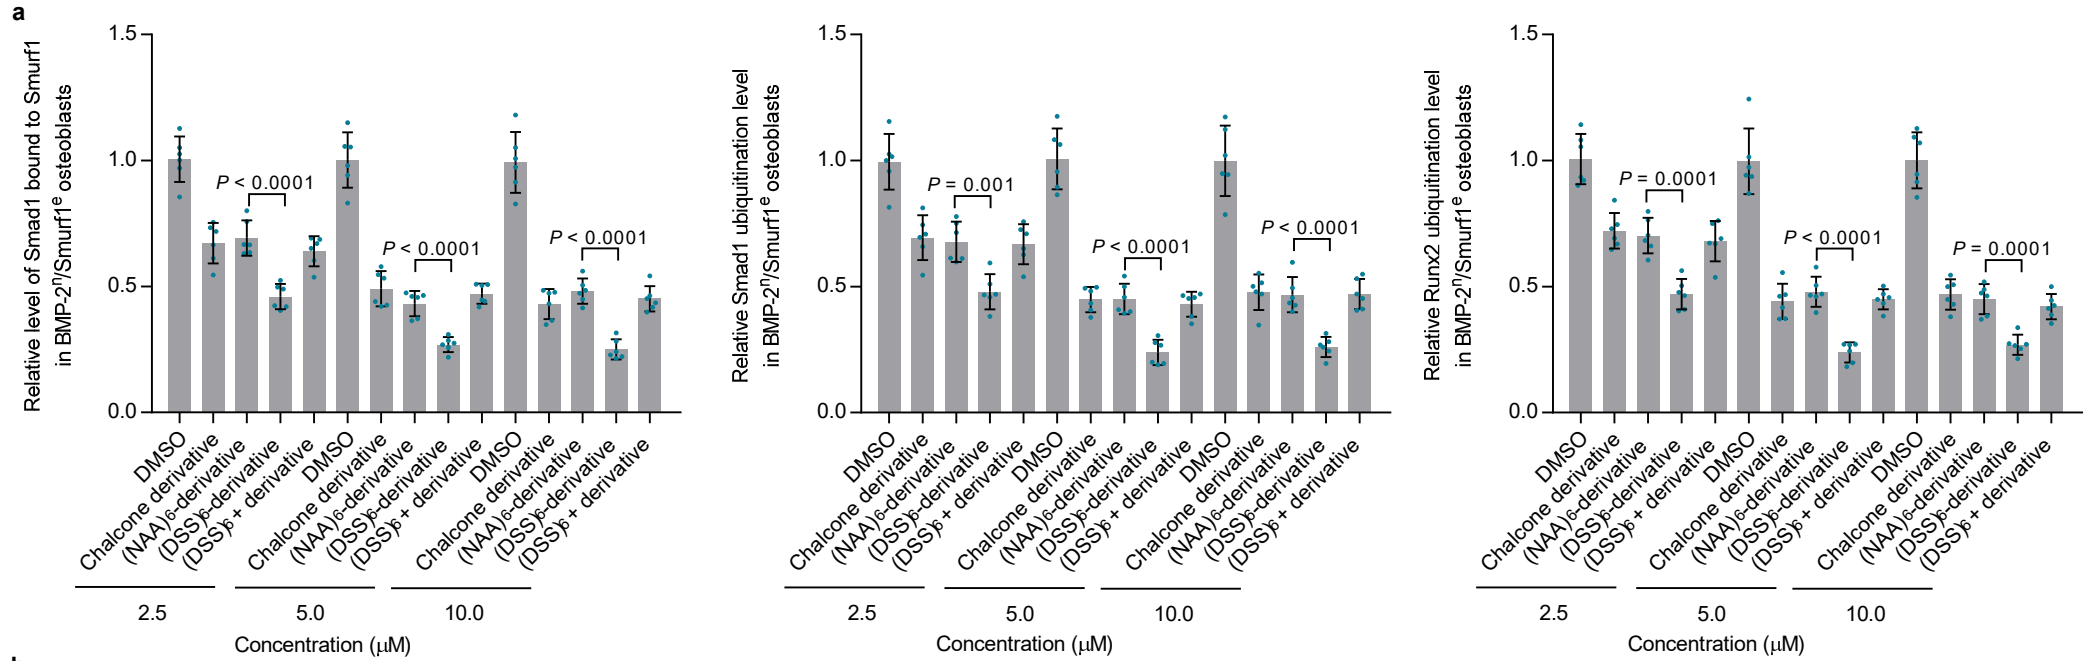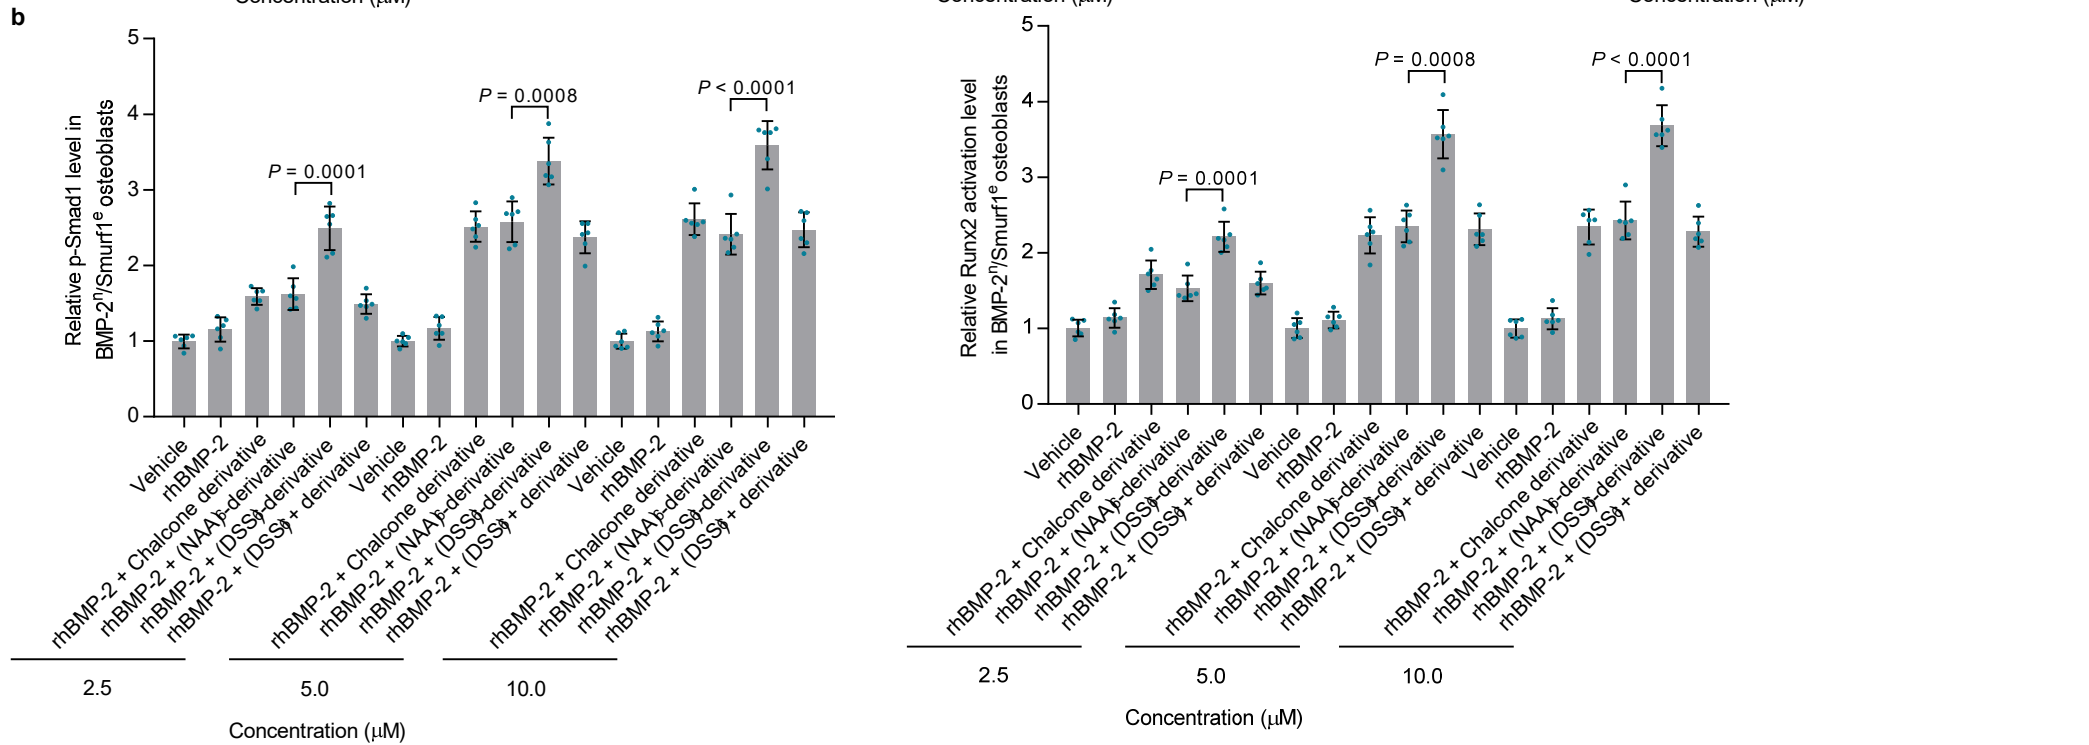

**c**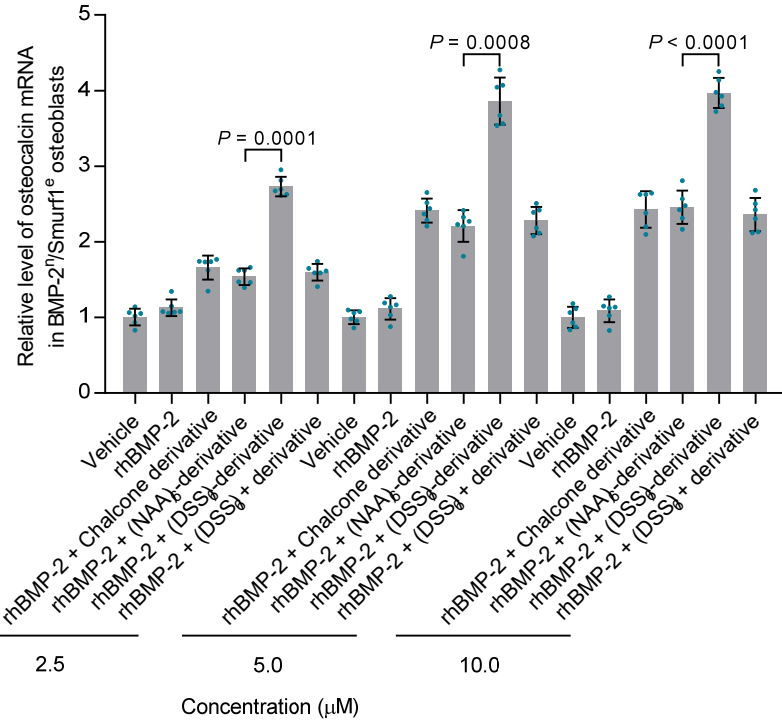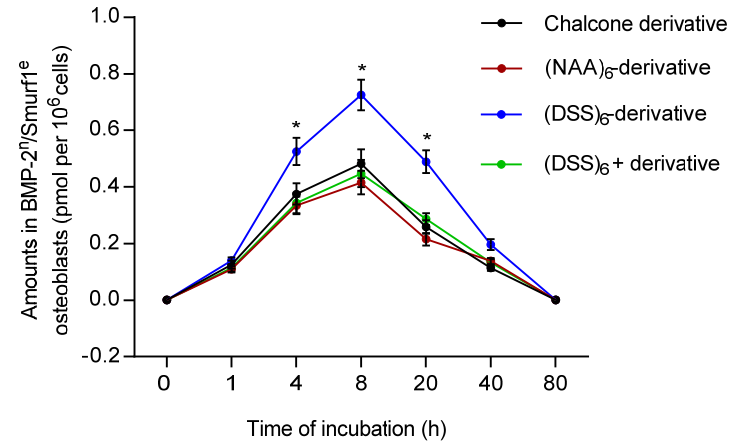**d**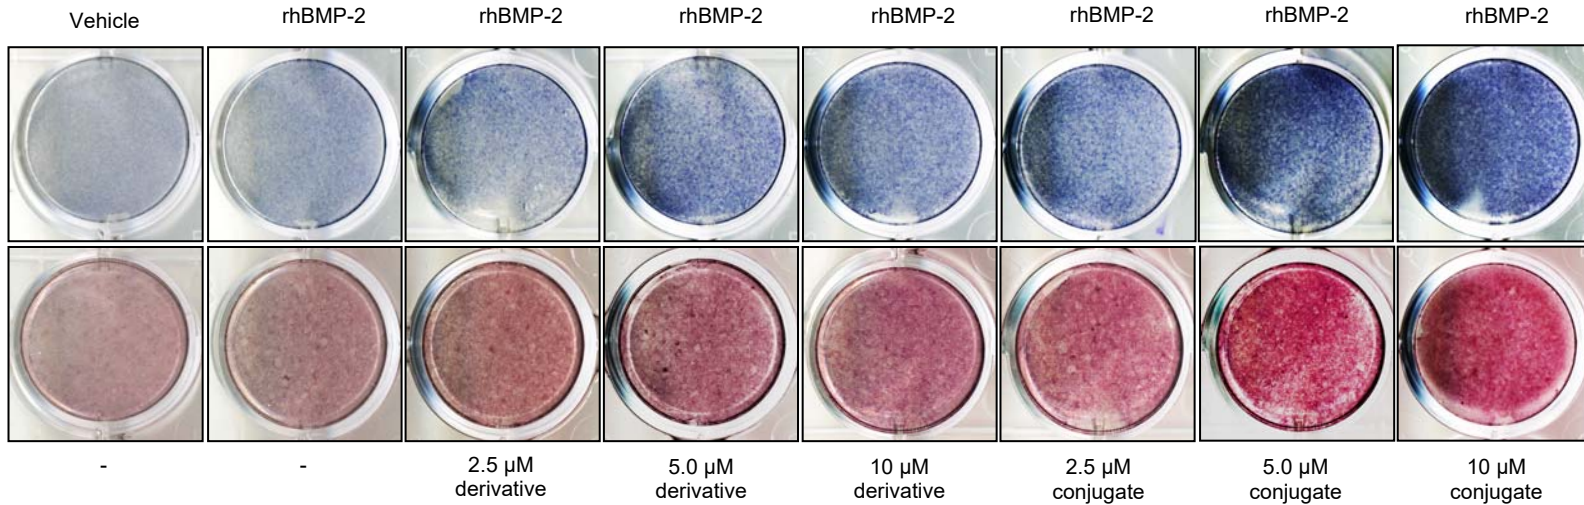**e**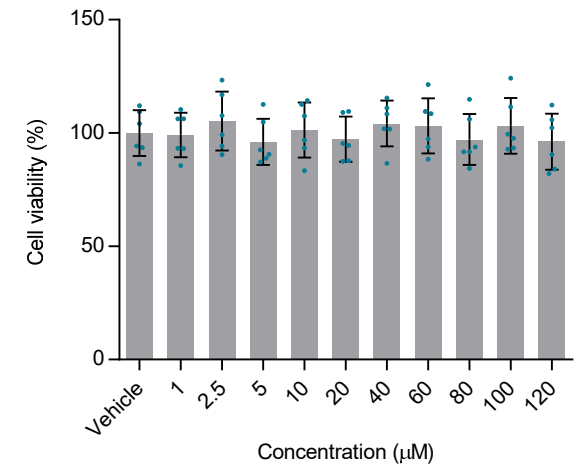

**Supplementary Figure 15. Effects of different chalcone derivative formulations on Smurf1 activity and BMP signaling in osteoblasts from mice BMP-2<sup>n</sup>/Smurf1<sup>e</sup> subgroup.** **(a)** Relative level of Smurf1 activity (Smad1 bound to Smurf1, ubiquitination of Smad1 and Runx2) in osteoblasts (from BMP-2<sup>n</sup>/Smurf1<sup>e</sup> subgroup of 15-month-old osteoporotic mice) incubated with the chalcone derivative, (DSS)<sub>6</sub>-derivative, (NAA)<sub>6</sub>-derivative, (DSS)<sub>6</sub> + derivative, at a series of concentrations (2.5, 5.0 and 10.0 μM), respectively. **(b)** Relative level of p-Smad1, Runx2 activation and osteocalcin mRNA in osteoblasts (from BMP-2<sup>n</sup>/Smurf1<sup>e</sup> subgroup) incubated with the chalcone derivative, (DSS)<sub>6</sub>-derivative, (NAA)<sub>6</sub>-derivative and (DSS)<sub>6</sub> + derivative, at a series of concentrations (2.5, 5.0 and 10.0 μM), respectively, with the presence of 100 ng ml<sup>-1</sup> rhBMP-2. **(c)** Amounts of chalcone derivative or (DSS)<sub>6</sub>-derivative or (NAA)<sub>6</sub>-derivative or (DSS)<sub>6</sub> + derivative in osteoblasts (from BMP-2<sup>n</sup>/Smurf1<sup>e</sup> subgroup) at a series of incubation times (0, 1, 4, 8, 20, 40 and 80 h) determined by LC-MS/MS. \**P* < 0.0001 for (DSS)<sub>6</sub>-derivative versus (NAA)<sub>6</sub>-derivative at 4, 8 and 20 h. **(d)** Alp and alizarin red staining showing effects of the chalcone derivative or (DSS)<sub>6</sub>-derivative on Alp activity and mineralized nodule formation in BMP-2<sup>n</sup>/Smurf1<sup>e</sup> osteoblasts treated with rhBMP-2. **(e)** MTT assay showing *in vitro* cell viability of osteoblasts (from BMP-2<sup>n</sup>/Smurf1<sup>e</sup> subgroup) incubated with the (DSS)<sub>6</sub>-derivative at a series of concentrations (1.0, 2.5, 5.0, 10.0, 20.0 and 60.0, 80.0, 100.0 and 120.0 μM). The levels of Smad1 bound to Smurf1, Smurf1 and p-Smad1, ubiquitination of Smad1 and Runx2, Runx2 activation and osteocalcin mRNA were normalized to the mean values of osteoblasts treated with DMSO or vehicle (PBS). *n* = 6 per group. Data are mean ± s.d. followed by one-way ANOVA with a *post-hoc* test.

**a**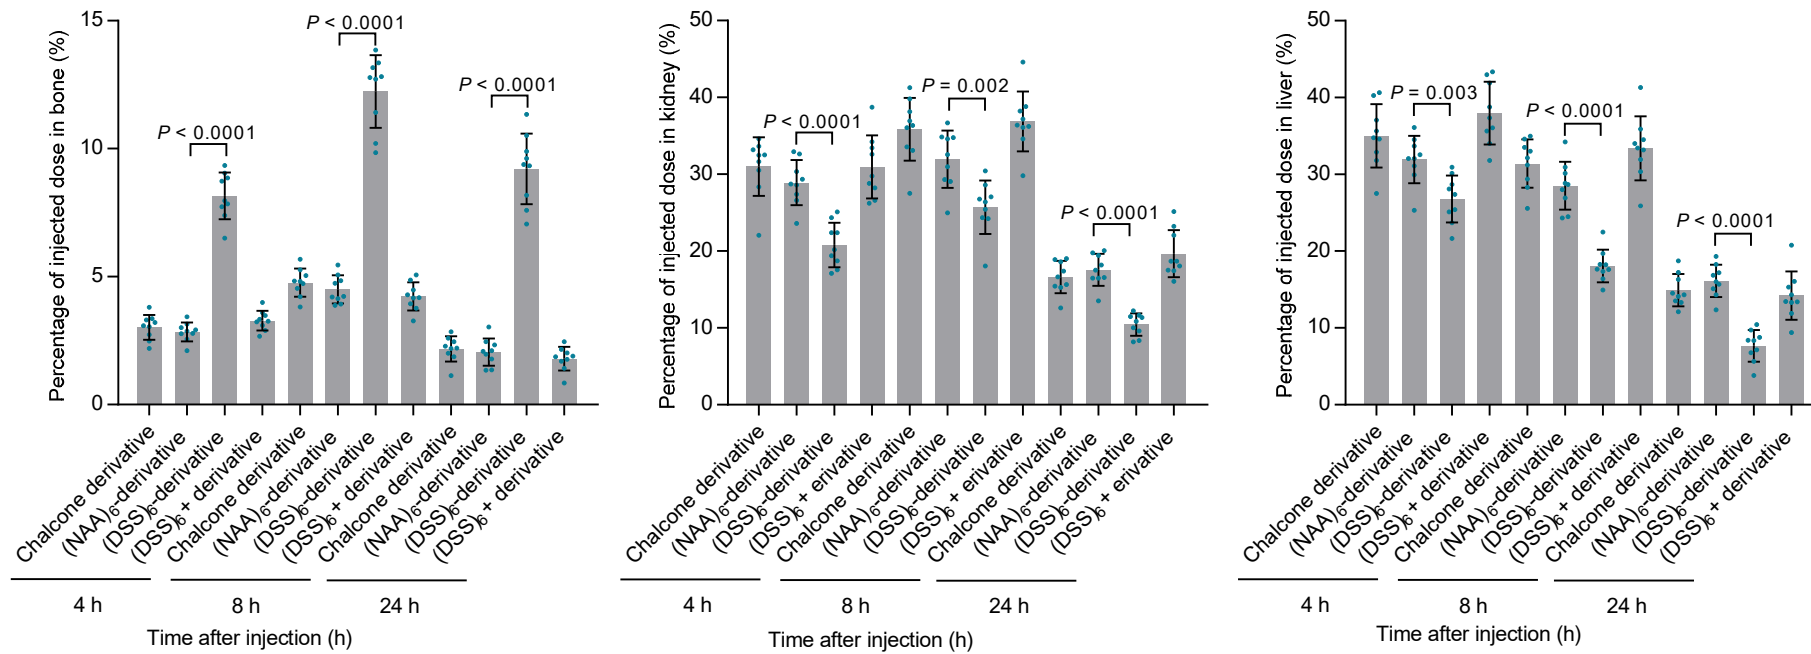**b**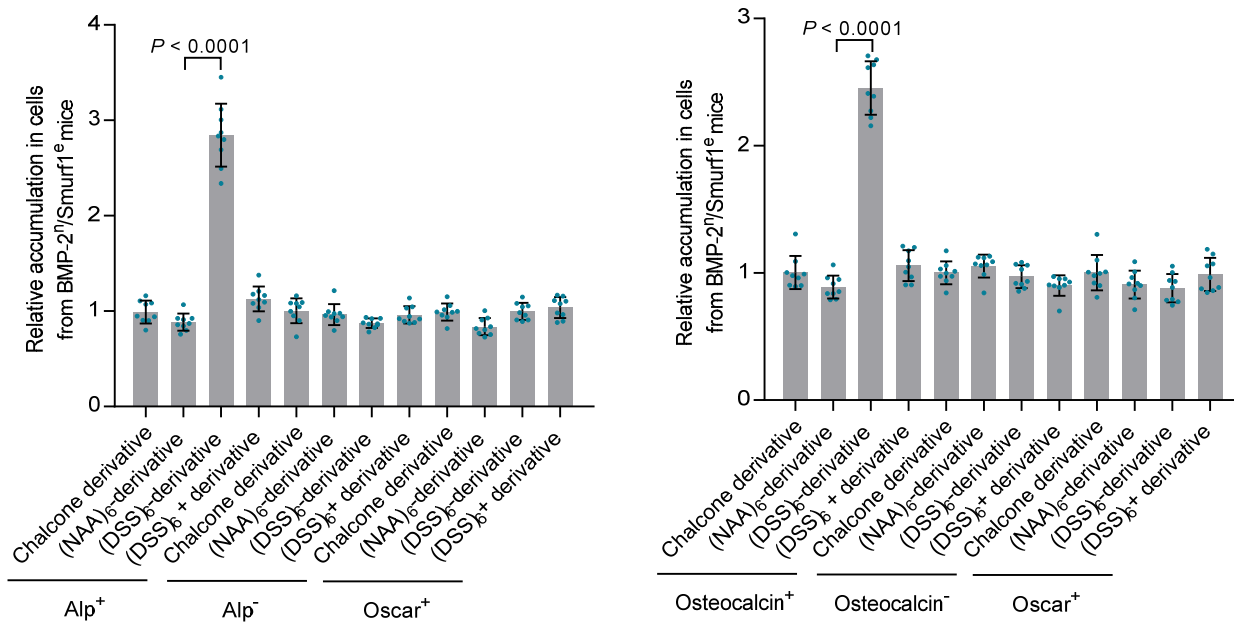

**c**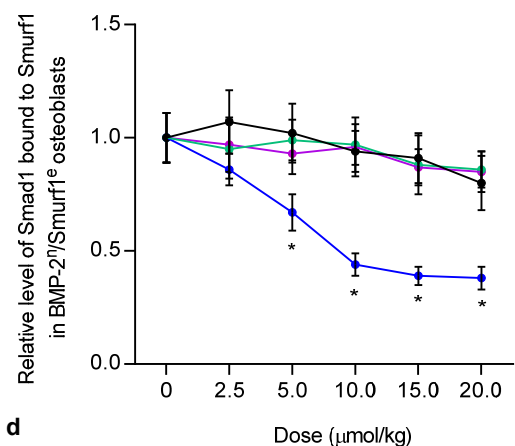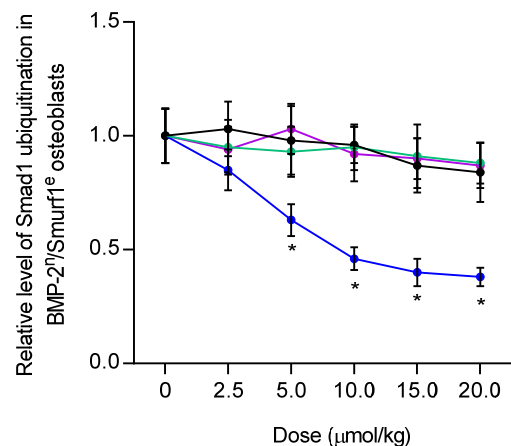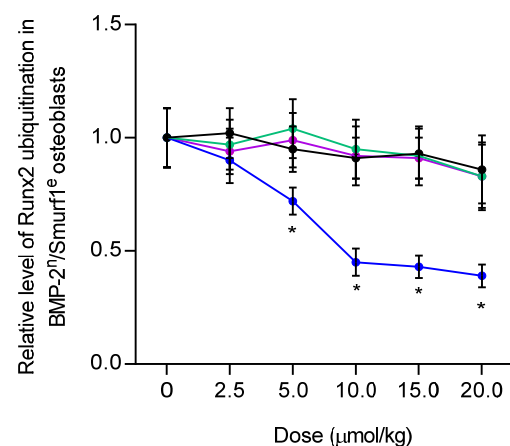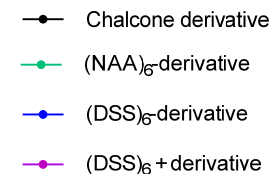**d**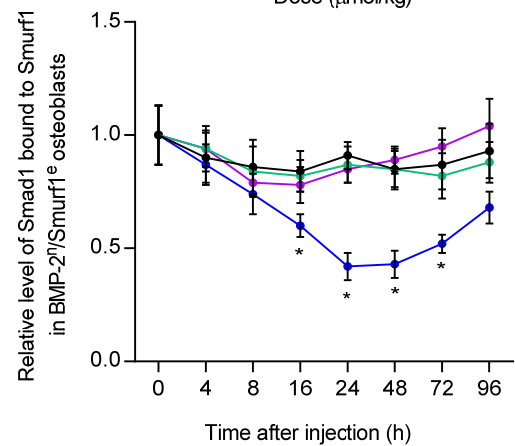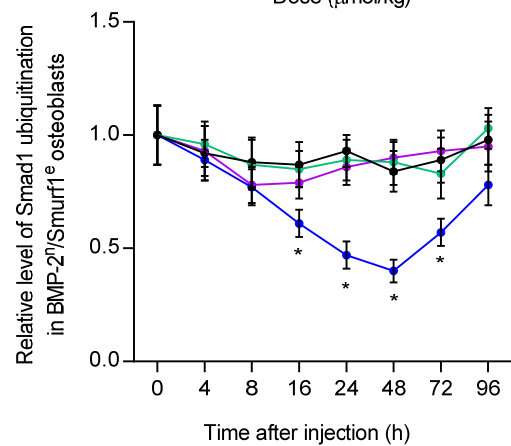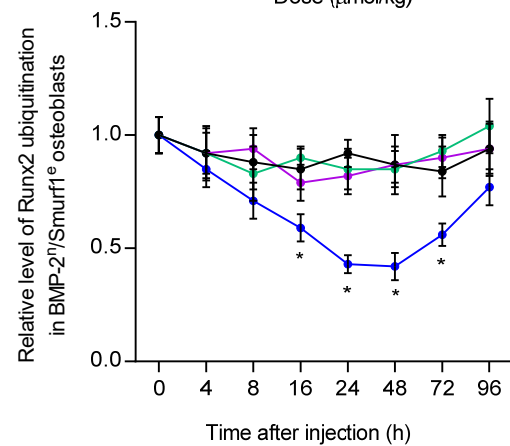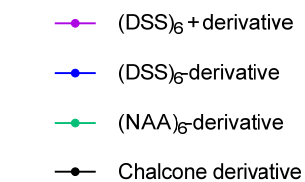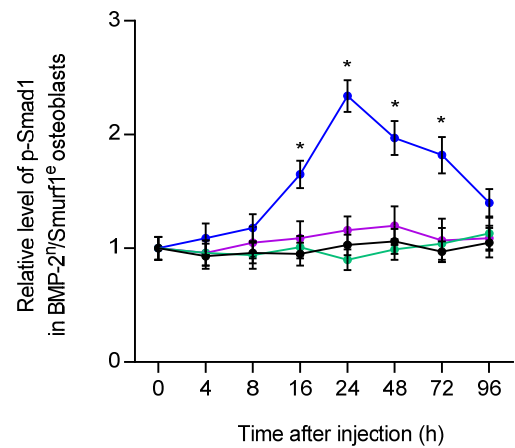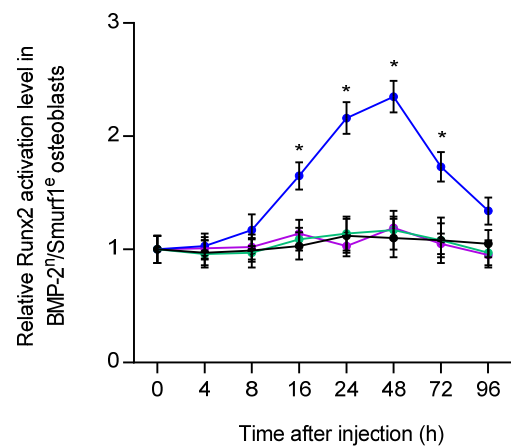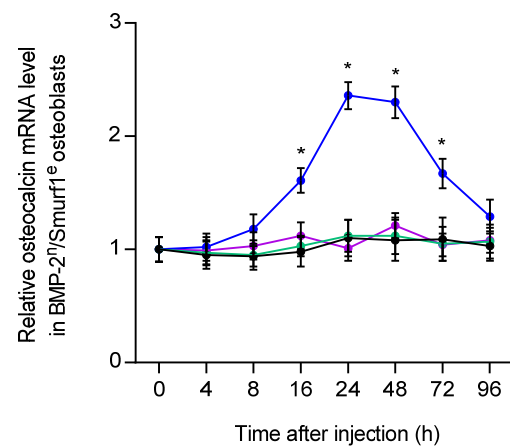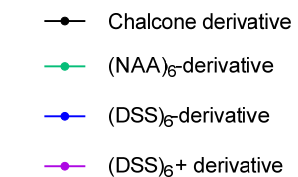

**Supplementary Figure 16. Tissue distribution, osteoblast accumulation and dose-response pattern of different chalcone derivative formulations.**

**(a)** Quantitative analysis of different chalcone derivative formulations by LC-MS/MS in bones, livers and kidneys from BMP-2<sup>n</sup>/Smurf1<sup>e</sup> subgroup of 15-month-old osteoporotic mice (OVX at 6 months old) with intravenous administration of chalcone derivative, (NAA)<sub>6</sub>-derivative, (DSS)<sub>6</sub>-derivative and (DSS)<sub>6</sub> + derivative, respectively. The amounts of chalcone derivative formulations in different tissues were normalized to injected dose. **(b)** Quantitative analysis of chalcone derivative formulations by LC-MS/MS in Alp<sup>+</sup>, Alp<sup>-</sup>, osteocalcin<sup>+</sup>, osteocalcin<sup>-</sup> and Oscar<sup>+</sup> cells (sorted by FACS). The amounts of chalcone derivative formulations in different cells were normalized to mean value of Alp<sup>+</sup> or osteocalcin<sup>+</sup> cells from the mice with intravenous administration of the chalcone derivative. **(c)** Relative level of Smurf1 activity (Smad1 bound to Smurf1, ubiquitination of Smad1 and Runx2) in osteocalcin<sup>+</sup> cells (sorted by FACS) from BMP-2<sup>n</sup>/Smurf1<sup>e</sup> subgroup of 15-month-old osteoporotic mice administered with different chalcone derivative formulations at a series of doses (2.5, 5.0, 10.0, 15.0 and 20.0 μmol kg<sup>-1</sup>). **(d)** Relative level of Smurf1 activity (Smad1 bound to Smurf1, ubiquitination of Smad1 and Runx2), p-Smad1, Runx2 activation and osteocalcin mRNA in osteocalcin<sup>+</sup> cells (sorted by FACS) from BMP-2<sup>n</sup>/Smurf1<sup>e</sup> subgroup of 15-month-old osteoporotic mice administered with different chalcone derivative formulations (10.0 μmol kg<sup>-1</sup>) at a series of time points (4, 8, 16, 24, 48, 72 and 96 h). \**P* < 0.0001 for (DSS)<sub>6</sub>-derivative versus (NAA)<sub>6</sub>-derivative at 16, 24, 48 and 72 h. Relative levels of Smad1 bound to Smurf1, p-Smad1, Runx2 activation, ubiquitination of Smad1 and Runx2 and osteocalcin mRNA were normalized to the mean values of osteocalcin<sup>+</sup> cells from osteoporotic BMP-2<sup>n</sup>/Smurf1<sup>e</sup> mice treated with vehicle. *n* = 9 per group. Data are mean ± s.d. followed by one-way ANOVA with a *post-hoc* test.



**a**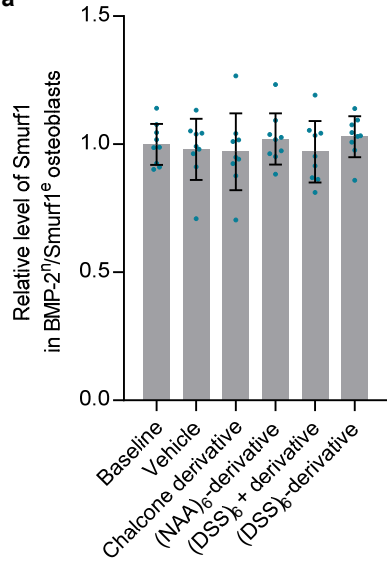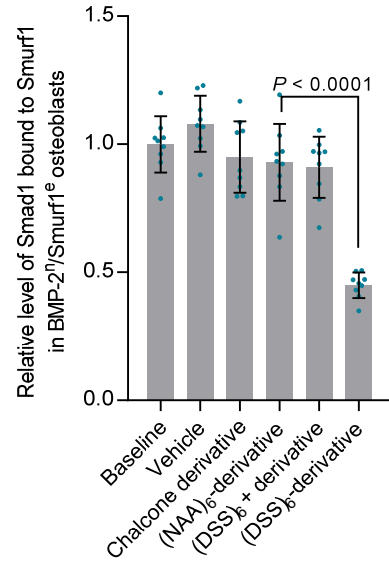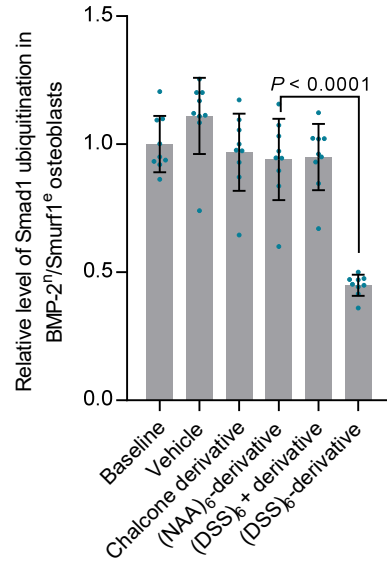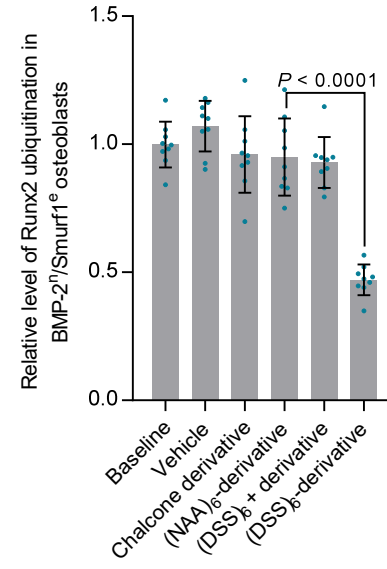**b**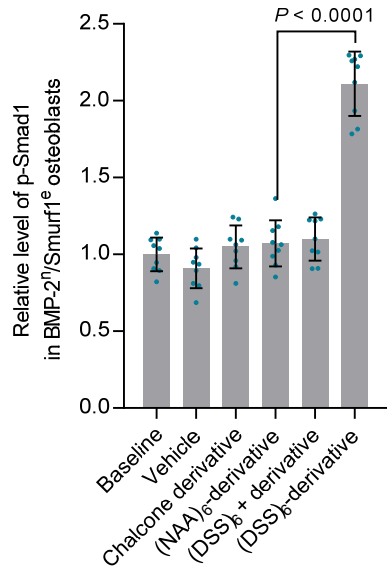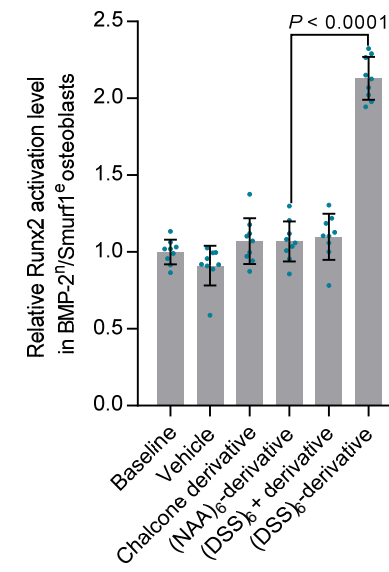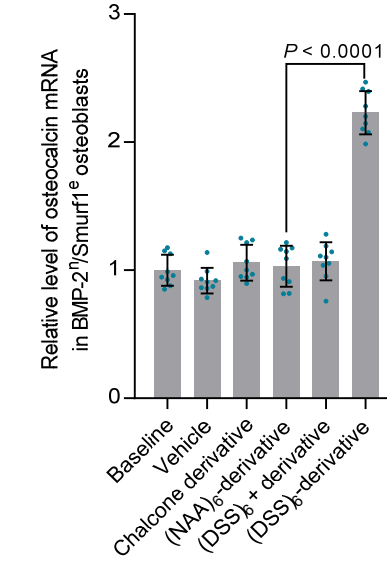

**Supplementary Figure 17. Effects of different chalcone derivative formulations on Smurf1 activity and BMP signaling in osteoblasts from mice BMP-2<sup>n</sup>/Smurf1<sup>e</sup> subgroup.** **(a)** Relative levels of Smurf1 expression and Smurf1 activity (Smad1 bound to Smurf1, ubiquitination of Smad1 and Runx2) in osteoblasts isolated from BMP-2<sup>n</sup>/Smurf1<sup>e</sup> subgroup of 15-month-old osteoporotic mice (OVX at 6 months old) administrated with vehicle, chalcone derivative, (NAA)<sub>6</sub>-chalcone derivative, (DSS)<sub>6</sub>-chalcone derivative and (DSS)<sub>6</sub> + chalcone derivative, at a dose of 10.0 μmol kg<sup>-1</sup>, respectively. **(b)** Relative levels of p-Smad1, Runx2 activation and osteocalcin mRNA in the above osteoblasts. Relative levels of Smurf1 and p-Smad1, Smad1 bound to Smurf1, Runx2 activation, ubiquitination of Smad1 and Runx2 and osteocalcin mRNA were normalized to the mean values of osteoblasts before the treatment (baseline). *n* = 9 per group. Data are mean ± s.d. followed by one-way ANOVA with a *post-hoc* test.

**a**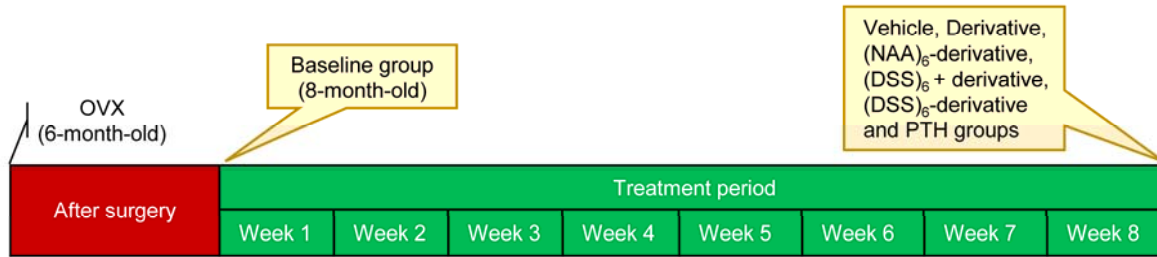**b**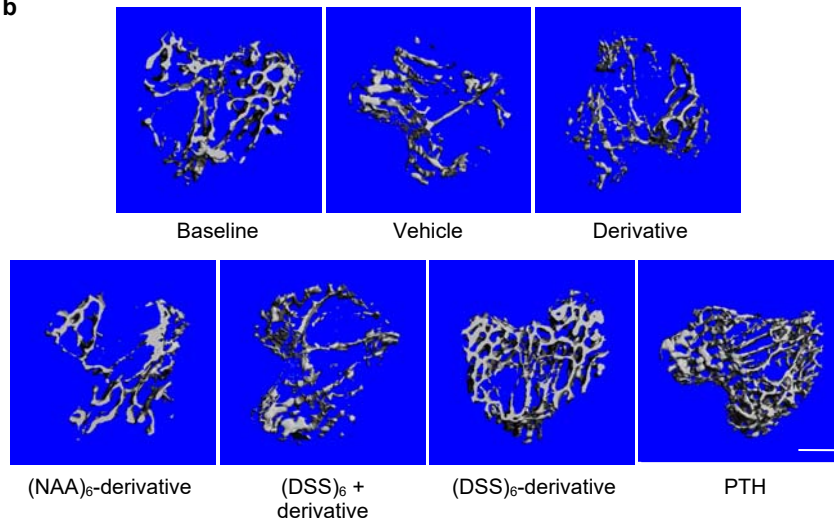**c**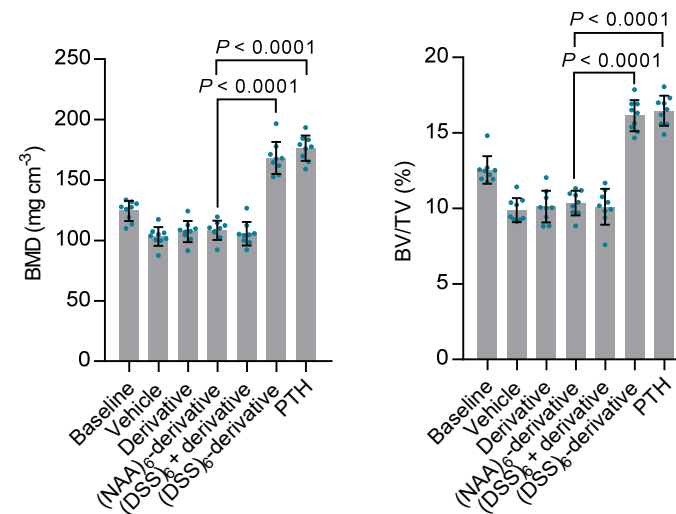**d**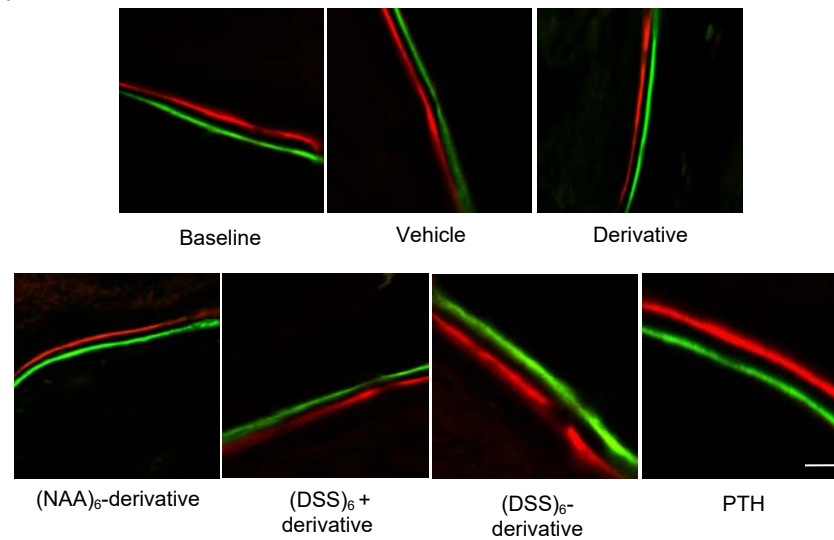**e**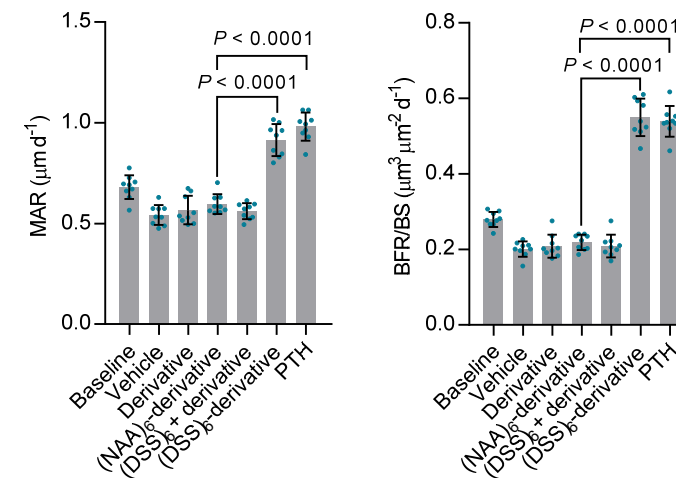

**f**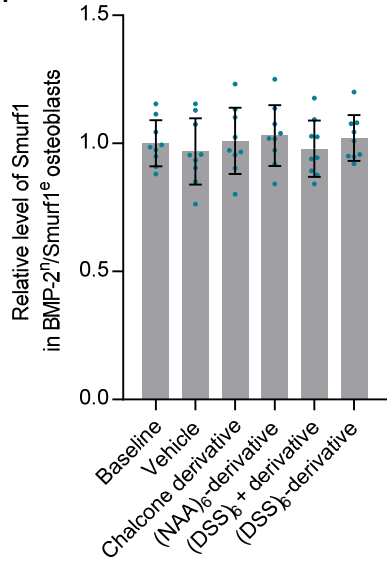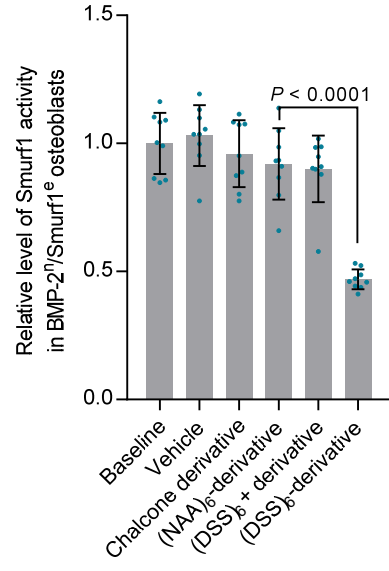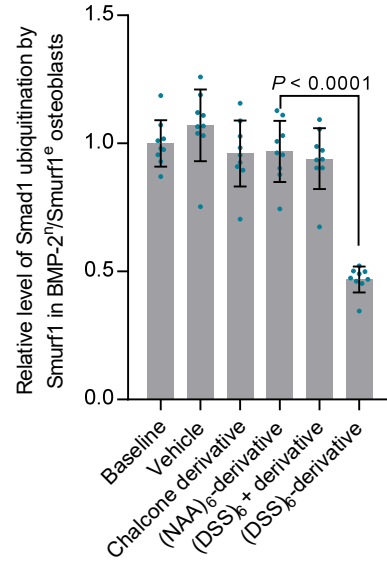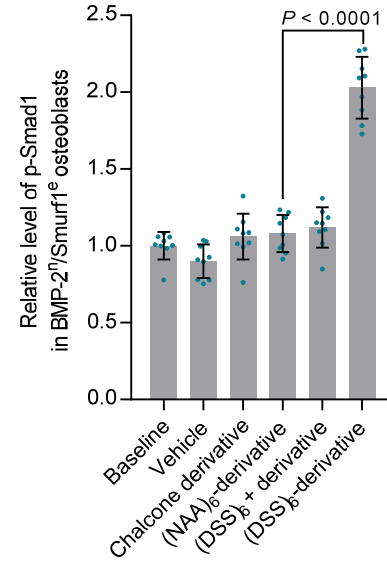**g**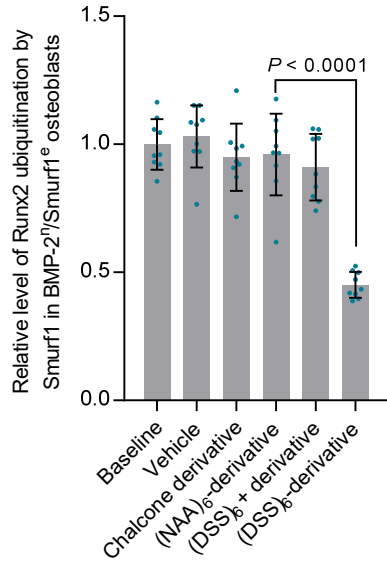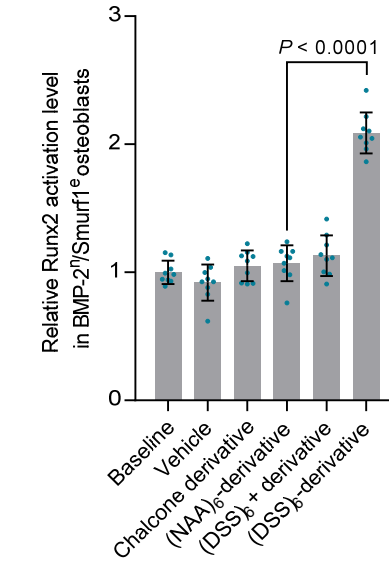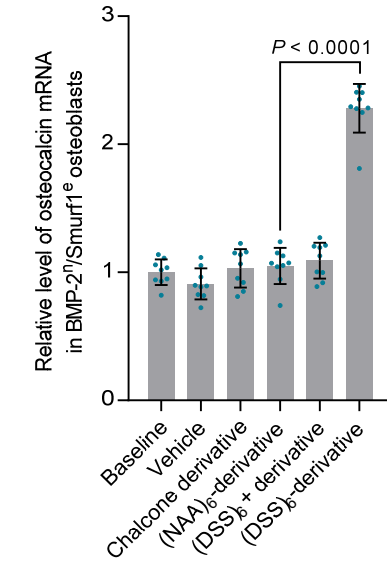

**Supplementary Figure 18. Effects of different chalcone derivative formulations on Smurf1 activity, BMP signaling and systemic bone formation in mice BMP-2<sup>n</sup>/Smurf1<sup>e</sup> subgroup.** (a) A schematic diagram illustrating the experimental design. 6-month-old mice were OVX and left untreated for 2 months (8-month-old) to induce osteoporosis. The mice received intravenous administration of the chalcone derivative formulations at a dose of 10.0  $\mu\text{mol kg}^{-1}$ , with an injection interval of once every three days, or daily subcutaneous injection of recombinant human parathyroid hormone (PTH, amino acids 1-34) at a dose of 40.0  $\mu\text{g kg}^{-1}$ . (b) Representative images showing three-dimensional trabecular architecture by microCT reconstruction at the proximal tibia. Scale bars, 500  $\mu\text{m}$ . (c) MicroCT measurements for BMD and BV/TV at the proximal tibia. (d) Representative images showing bone formation at the proximal tibia assessed by xylenol (red) and calcein (green) labeling. Scale bar, 10  $\mu\text{m}$ . (e) Analysis of dynamic bone histomorphometric parameters (MAR and BFR/BS) at the proximal tibia. (f) Relative levels of Smurf1 expression and Smurf1 activity (Smad1 bound to Smurf1 and ubiquitination of Smad1 and Runx2) in osteoblasts isolated from BMP-2<sup>n</sup>/Smurf1<sup>e</sup> subgroup of osteoporotic mice administrated with vehicle, chalcone derivative, (NAA)<sub>6</sub>-chalcone derivative, (DSS)<sub>6</sub>-chalcone derivative and (DSS)<sub>6</sub> + chalcone derivative, respectively. (g) Relative levels of p-Smad1, Runx2 activation and osteocalcin mRNA in the above osteoblasts. Relative levels of Smurf1 and p-Smad1, Smad1 bound to Smurf1, Runx2 activation, ubiquitination of Smad1 and Runx2 and osteocalcin mRNA were normalized to the mean values of osteoblasts before the treatment (baseline).  $n = 9$  per group. Data are mean  $\pm$  s.d. followed by one-way ANOVA with a *post-hoc* test.

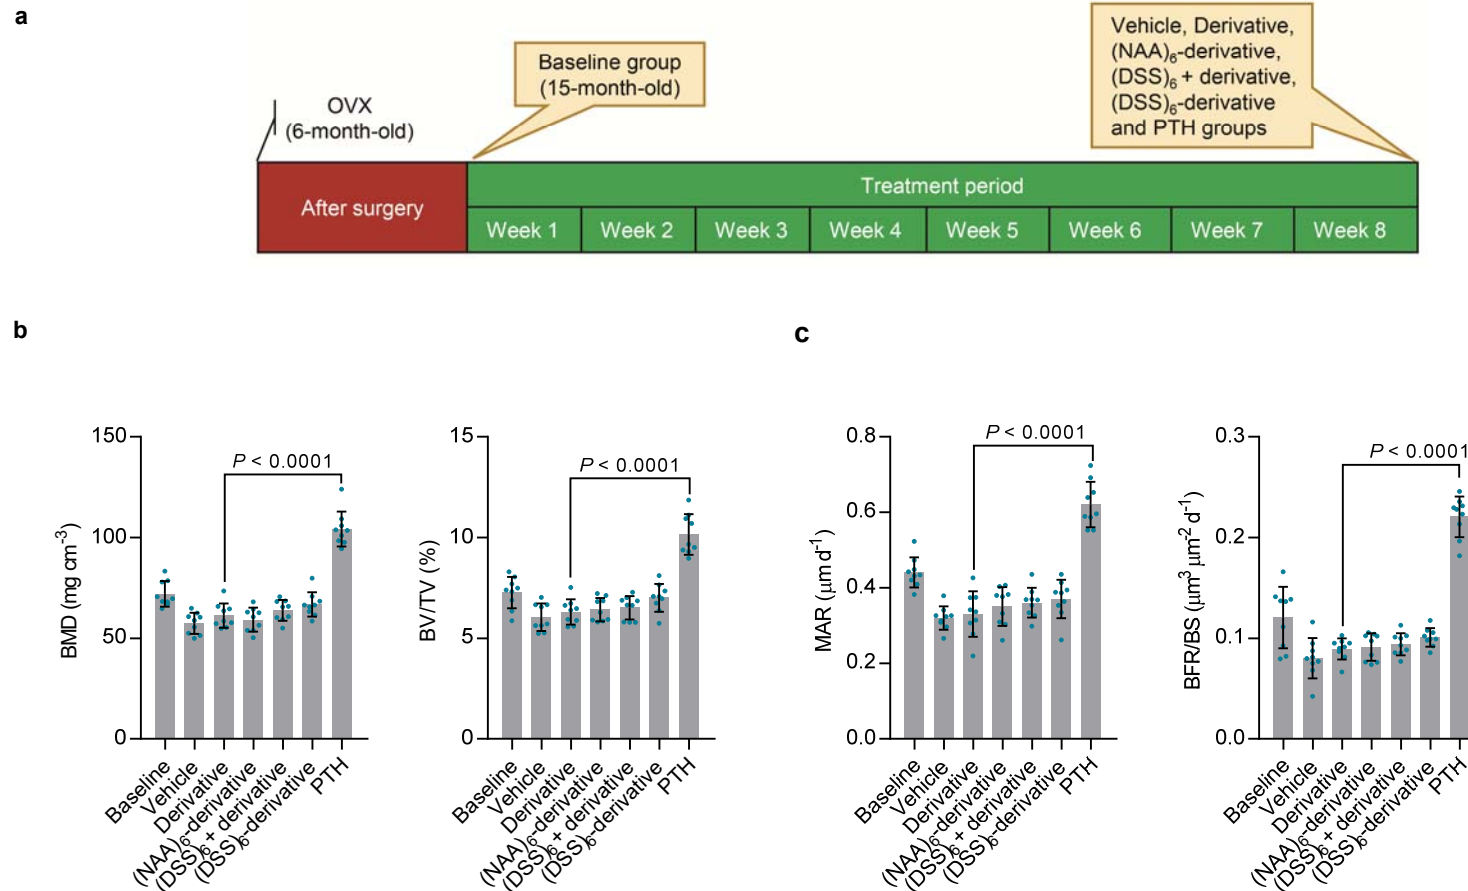

**Supplementary Figure 19. Effects of different chalcone derivative formulations on systemic bone formation in mice BMP-2<sup>d</sup>/Smurf1<sup>n</sup> subgroup. (a)** A schematic diagram illustrating the experimental design. 6-month-old mice were OVX and left untreated for 9 months (15-month-old) to induce osteoporosis. The mice received intravenous administration of the chalcone derivative formulations at a dose of 10.0  $\mu\text{mol kg}^{-1}$ , with an injection interval of once every three days, or subcutaneous injection of recombinant human parathyroid hormone (PTH, amino acids 1-34) at a dose of 40.0  $\mu\text{g kg}^{-1}$ . **(b)** microCT measurements for BMD and BV/TV at the proximal tibia. Scale bars, 500  $\mu\text{m}$ . **(c)** Analysis of dynamic bone histomorphometric parameters (MAR and BFR/BS) at the proximal tibia.  $n = 9$  per group. Data are mean  $\pm$  s.d. followed by one-way ANOVA with a *post-hoc* test.

**a**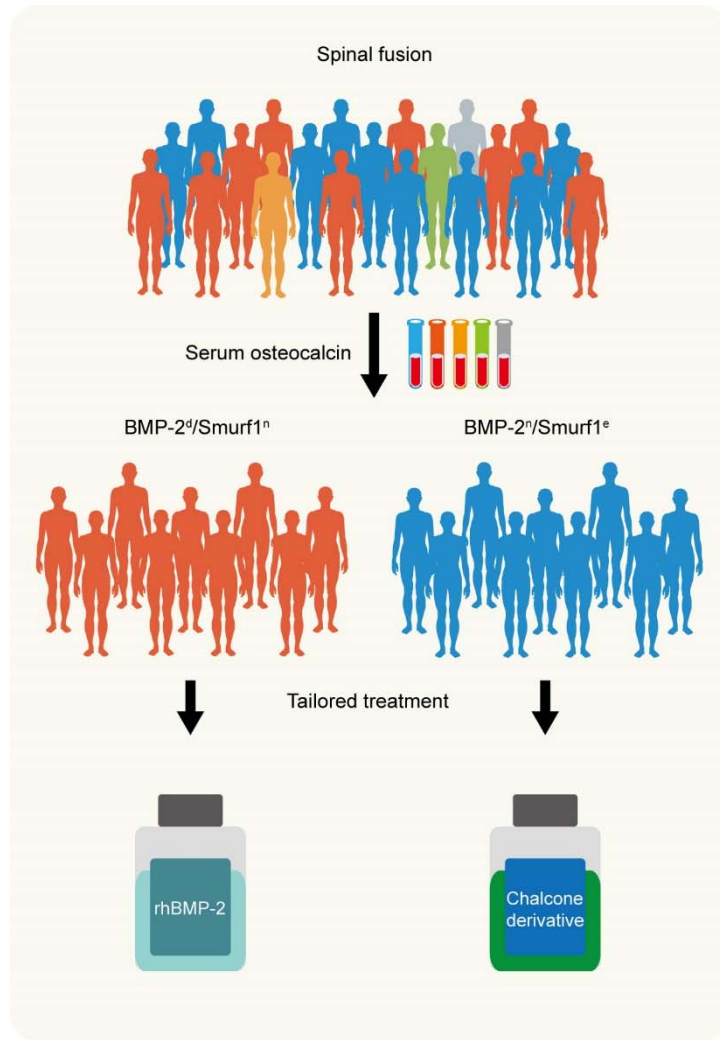**b**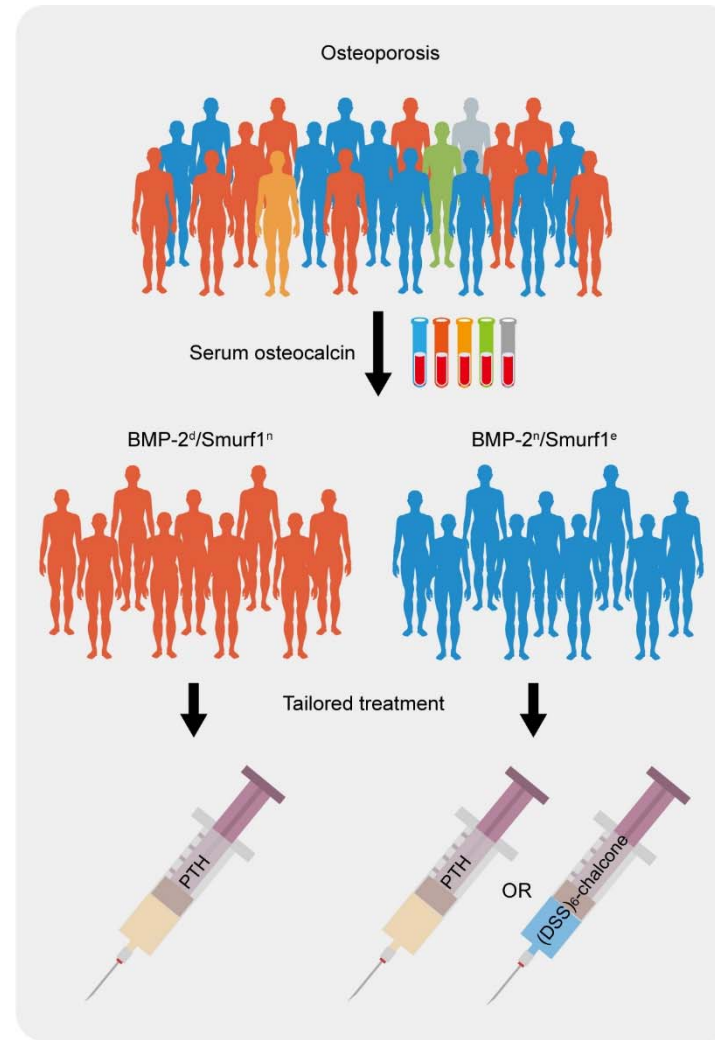

**Supplementary Figure 20. Proposed precision medicine-based bone anabolic strategy.** Age-related osteoporotic population could be classified into different subgroups by a serum osteocalcin-based stratification method. **(a)** Traditional rhBMP-2 could be continuously used to promote local bone formation in BMP-2<sup>Δ</sup>/Smurf1<sup>n</sup> subgroup during spinal fusion, while chalcone derivative is a promising tailored treatment for spinal fusion in BMP-2<sup>n</sup>/Smurf1<sup>e</sup> subgroup. **(b)** For systemic bone formation, (DSS)<sub>6</sub>-chalcone derivative could be an alternative therapeutic in BMP-2<sup>n</sup>/Smurf1<sup>e</sup> subgroup besides the standard bone anabolic agent PTH in treatment of age-related osteoporosis.

Supplementary Fig. 8f

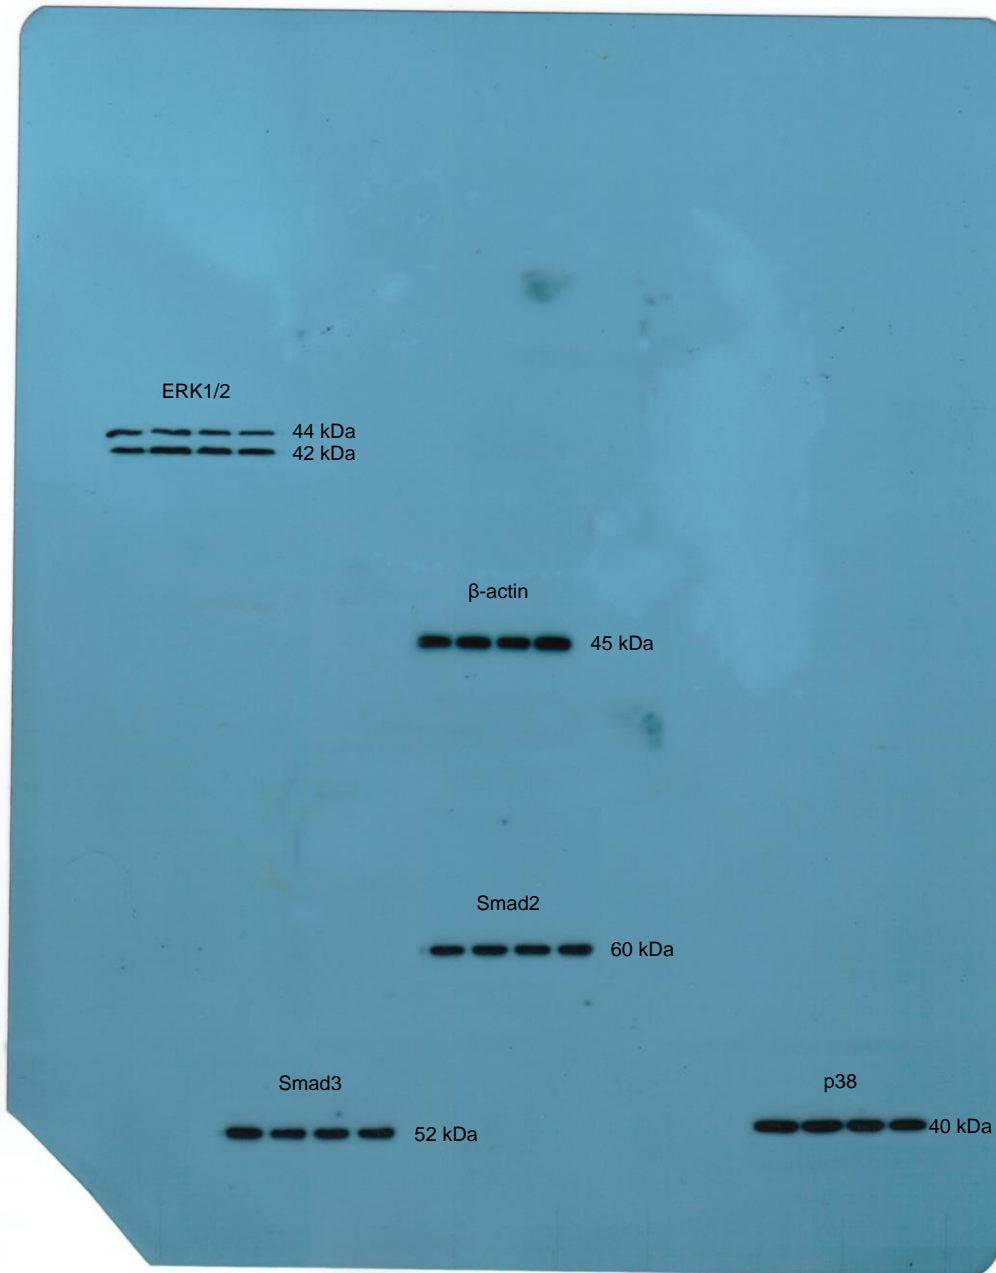



Supplementary Fig. 8f

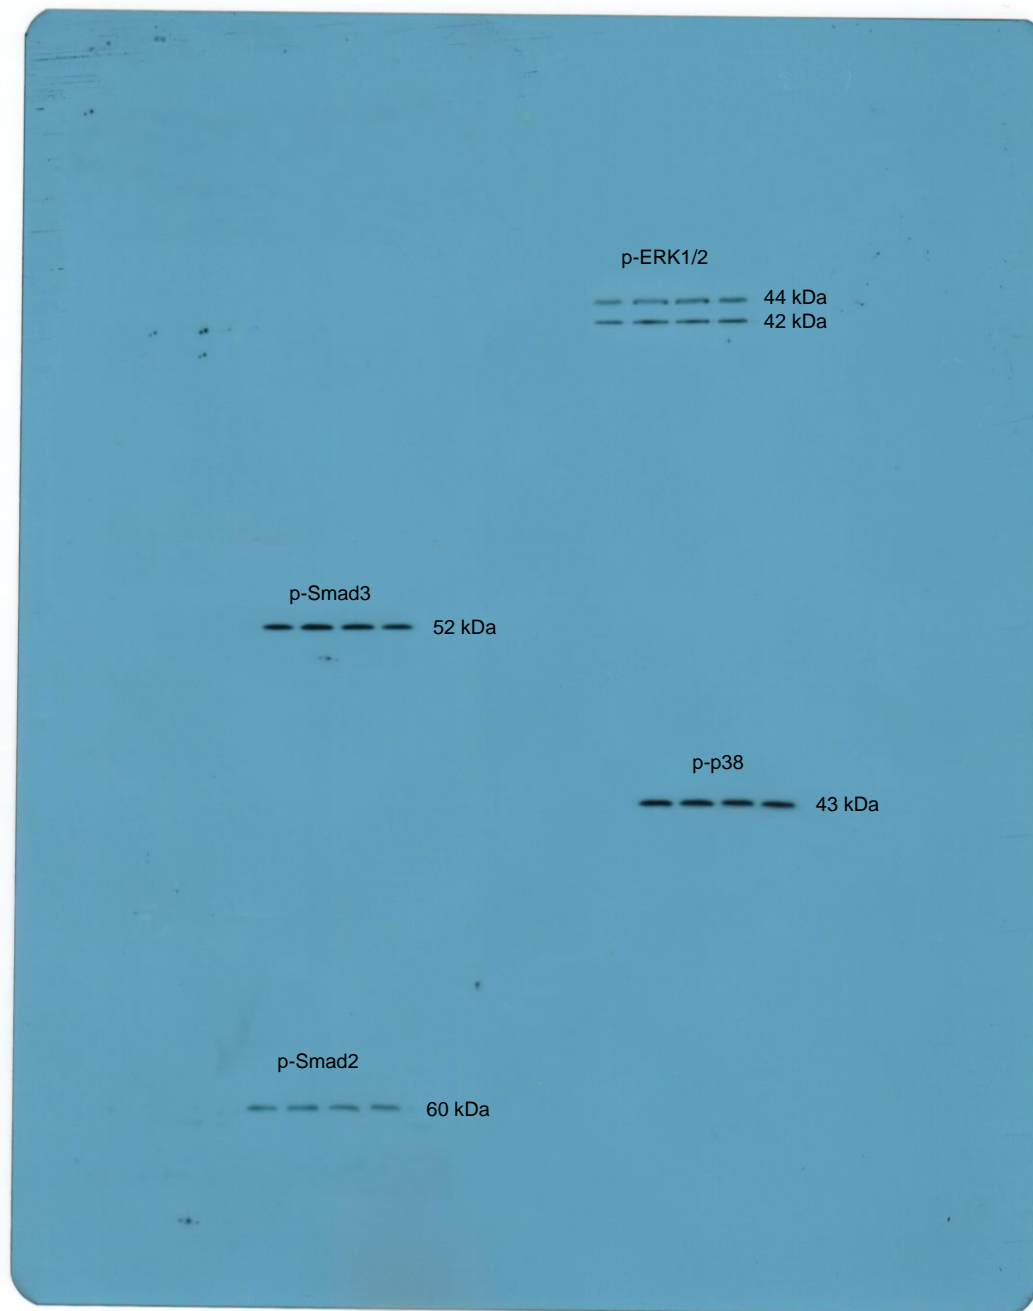

Supplementary Fig. 9c

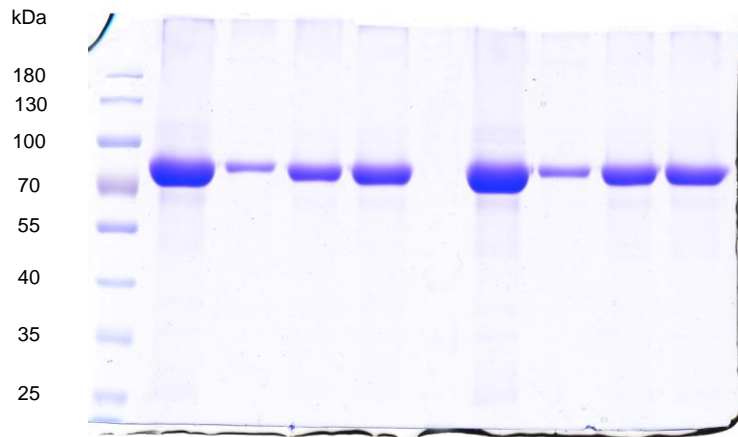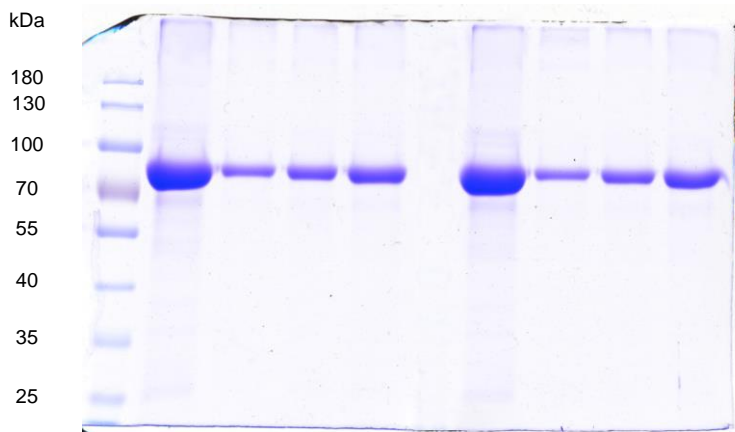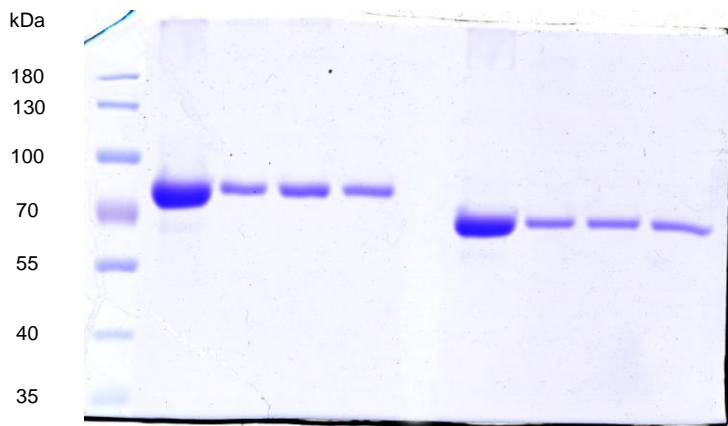

Supplementary Fig. 21. The uncropped western blots and gels.

**Supplementary Table 1. Clinical features of aged osteoporotic VCF and adult traumatic VCF patients**

| Patient No. | Age | Gender | T score for BMD at lumbar spine | Diagnosis                | Surgical operation                       |
|-------------|-----|--------|---------------------------------|--------------------------|------------------------------------------|
| 1           | 67  | Female | -2.3                            | L1 fragile fracture      | Percutaneous vertebroplasty              |
| 2           | 61  | Female | -2.4                            | L2 fragile fracture      | Fracture reduction and internal fixation |
| 3           | 63  | Male   | -2.6                            | L4 fragile fracture      | Percutaneous kyphoplasty                 |
| 4           | 65  | Female | -3.1                            | T12 fragile fracture     | Percutaneous kyphoplasty                 |
| 5           | 61  | Female | -2.2                            | T12 fragile fracture     | Fracture reduction and internal fixation |
| 6           | 62  | Female | -2.1                            | L4 fragile fracture      | Fracture reduction and internal fixation |
| 7           | 64  | Male   | -2.6                            | T10/T11 fragile fracture | Percutaneous kyphoplasty                 |
| 8           | 62  | Female | -2.3                            | L2/L4 fragile fracture   | Fracture reduction and internal fixation |
| 9           | 63  | Male   | -2.4                            | L1 fragile fracture      | Percutaneous vertebroplasty              |
| 10          | 68  | Male   | -2.5                            | L2 fragile fracture      | Percutaneous kyphoplasty                 |
| 11          | 61  | Male   | -2.3                            | L3 fragile fracture      | Percutaneous kyphoplasty                 |
| 12          | 62  | Female | -1.9                            | L5 fragile fracture      | Percutaneous vertebroplasty              |
| 13          | 68  | Female | -3.0                            | L1/L2 fragile fracture   | Percutaneous kyphoplasty                 |
| 14          | 64  | Male   | -2.7                            | L4 fragile fracture      | Percutaneous kyphoplasty                 |
| 15          | 63  | Female | -2.0                            | T10 fragile fracture     | Fracture reduction and internal fixation |
| 16          | 68  | Female | -2.5                            | T11/L2 fragile fracture  | Percutaneous vertebroplasty              |
| 17          | 69  | Male   | -2.3                            | L1 fragile fracture      | Percutaneous vertebroplasty              |
| 18          | 63  | Female | -2.6                            | L3 fragile fracture      | Fracture reduction and internal fixation |
| 19          | 61  | Female | -2.2                            | L2/L4 fragile fracture   | Percutaneous kyphoplasty                 |
| 20          | 64  | Female | -2.5                            | T8 fragile fracture      | Percutaneous kyphoplasty                 |
| 21          | 62  | Male   | -2.3                            | T12 fragile fracture     | Percutaneous vertebroplasty              |
| 22          | 69  | Male   | -2.8                            | L1/L4 fragile fracture   | Percutaneous kyphoplasty                 |
| 23          | 62  | Female | -1.9                            | L4 fragile fracture      | Percutaneous vertebroplasty              |
| 24          | 64  | Female | -2.5                            | L1 fragile fracture      | Percutaneous vertebroplasty              |

|    |    |        |      |                         |                                          |
|----|----|--------|------|-------------------------|------------------------------------------|
| 25 | 61 | Female | -2.0 | L2/L3 fragile fracture  | Percutaneous vertebroplasty              |
| 26 | 69 | Male   | -2.6 | L2/L5 fragile fracture  | Percutaneous kyphoplasty                 |
| 27 | 65 | Male   | -2.4 | T9 fragile fracture     | Percutaneous kyphoplasty                 |
| 28 | 62 | Female | -2.3 | T11 fragile fracture    | Fracture reduction and internal fixation |
| 29 | 64 | Male   | -2.6 | L3 fragile fracture     | Percutaneous kyphoplasty                 |
| 30 | 60 | Female | -2.5 | L2/L4 fragile fracture  | Percutaneous kyphoplasty                 |
| 31 | 62 | Female | -2.4 | T12/L3 fragile fracture | Percutaneous kyphoplasty                 |
| 32 | 66 | Male   | -2.9 | L1 fragile fracture     | Percutaneous kyphoplasty                 |
| 33 | 64 | Female | -2.5 | L4 fragile fracture     | Percutaneous kyphoplasty                 |
| 34 | 69 | Female | -2.6 | T11 fragile fracture    | Percutaneous vertebroplasty              |
| 35 | 61 | Female | -2.1 | L2 fragile fracture     | Percutaneous vertebroplasty              |
| 36 | 64 | Male   | -2.3 | T12 fragile fracture    | Percutaneous vertebroplasty              |
| 37 | 68 | Female | -2.5 | T12 fragile fracture    | Percutaneous kyphoplasty                 |
| 38 | 63 | Female | -2.7 | L2 fragile fracture     | Fracture reduction and internal fixation |
| 39 | 60 | Male   | -2.8 | L1 fragile fracture     | Percutaneous kyphoplasty                 |
| 40 | 61 | Female | -2.2 | T8 fragile fracture     | Percutaneous vertebroplasty              |
| 41 | 64 | Male   | -2.4 | T10 fragile fracture    | Percutaneous kyphoplasty                 |
| 42 | 65 | Female | -2.6 | T12/L4 fragile fracture | Percutaneous vertebroplasty              |
| 43 | 67 | Female | -2.4 | L1 fragile fracture     | Percutaneous kyphoplasty                 |
| 44 | 66 | Female | -2.4 | T11 fragile fracture    | Percutaneous kyphoplasty                 |
| 45 | 62 | Female | -2.5 | T9 fragile fracture     | Percutaneous kyphoplasty                 |
| 46 | 61 | Female | -1.9 | L2/L3 fragile fracture  | Percutaneous vertebroplasty              |
| 47 | 69 | Male   | -2.5 | L1 fragile fracture     | Percutaneous kyphoplasty                 |
| 48 | 66 | Male   | -2.6 | L4 fragile fracture     | Percutaneous kyphoplasty                 |
| 49 | 65 | Female | -2.1 | T12 fragile fracture    | Percutaneous vertebroplasty              |
| 50 | 67 | Female | -2.4 | T12/L3 fragile fracture | Percutaneous kyphoplasty                 |

|    |    |        |      |                         |                                          |
|----|----|--------|------|-------------------------|------------------------------------------|
| 51 | 68 | Female | -2.9 | L5 fragile fracture     | Percutaneous vertebroplasty              |
| 52 | 61 | Female | -2.7 | L4 fragile fracture     | Percutaneous vertebroplasty              |
| 53 | 63 | Female | -1.9 | L1 fragile fracture     | Fracture reduction and internal fixation |
| 54 | 68 | Male   | -2.4 | T10 fragile fracture    | Percutaneous kyphoplasty                 |
| 55 | 64 | Female | -2.5 | T11 fragile fracture    | Percutaneous kyphoplasty                 |
| 56 | 64 | Female | -2.8 | L1 fragile fracture     | Percutaneous kyphoplasty                 |
| 57 | 67 | Male   | -2.2 | L2 fragile fracture     | Percutaneous vertebroplasty              |
| 58 | 66 | Female | -2.6 | L1 fragile fracture     | Percutaneous kyphoplasty                 |
| 59 | 66 | Male   | -1.8 | L2 fragile fracture     | Percutaneous vertebroplasty              |
| 60 | 65 | Male   | -2.7 | L2 fragile fracture     | Percutaneous kyphoplasty                 |
| 61 | 68 | Female | -2.5 | L2 fragile fracture     | Percutaneous vertebroplasty              |
| 62 | 67 | Female | -2.2 | L5 fragile fracture     | Percutaneous kyphoplasty                 |
| 63 | 65 | Female | -2.1 | L1 fragile fracture     | Percutaneous kyphoplasty                 |
| 64 | 66 | Female | -3.0 | L2 fragile fracture     | Fracture reduction and internal fixation |
| 65 | 64 | Male   | -2.6 | T11 fragile fracture    | Percutaneous kyphoplasty                 |
| 66 | 68 | Female | -3.6 | T12 fragile fracture    | Percutaneous kyphoplasty                 |
| 67 | 67 | Male   | -3.2 | T10/L2 fragile fracture | Percutaneous kyphoplasty                 |
| 68 | 66 | Female | -2.5 | T11 fragile fracture    | Percutaneous kyphoplasty                 |
| 69 | 65 | Male   | -2.6 | L5 fragile fracture     | Percutaneous vertebroplasty              |
| 70 | 67 | Female | -2.8 | L2 fragile fracture     | Percutaneous kyphoplasty                 |
| 71 | 67 | Female | -2.0 | L1/L4 fragile fracture  | Percutaneous kyphoplasty                 |
| 72 | 63 | Female | -1.9 | L2 fragile fracture     | Fracture reduction and internal fixation |
| 73 | 68 | Female | -2.6 | L1 fragile fracture     | Percutaneous kyphoplasty                 |
| 74 | 67 | Male   | -2.4 | T12 fragile fracture    | Percutaneous kyphoplasty                 |
| 75 | 63 | Male   | -1.9 | L1 fragile fracture     | Percutaneous kyphoplasty                 |
| 76 | 71 | Female | -2.5 | L2 fragile fracture     | Percutaneous kyphoplasty                 |

---

|     |    |        |      |                         |                             |
|-----|----|--------|------|-------------------------|-----------------------------|
| 77  | 72 | Female | -2.0 | L4 fragile fracture     | Percutaneous kyphoplasty    |
| 78  | 70 | Female | -2.4 | L1 fragile fracture     | Percutaneous kyphoplasty    |
| 79  | 76 | Male   | -3.6 | L5 fragile fracture     | Percutaneous kyphoplasty    |
| 80  | 70 | Male   | -2.1 | T11 fragile fracture    | Percutaneous kyphoplasty    |
| 81  | 73 | Female | -3.2 | T12 fragile fracture    | Percutaneous vertebroplasty |
| 82  | 74 | Female | -2.4 | L1 fragile fracture     | Percutaneous kyphoplasty    |
| 83  | 71 | Male   | -2.2 | L1/L4 fragile fracture  | Percutaneous kyphoplasty    |
| 84  | 70 | Female | -2.0 | L2 fragile fracture     | Percutaneous vertebroplasty |
| 85  | 75 | Female | -2.8 | T11/L2 fragile fracture | Percutaneous kyphoplasty    |
| 86  | 78 | Male   | -3.3 | L3 fragile fracture     | Percutaneous kyphoplasty    |
| 87  | 76 | Male   | -3.4 | L2 fragile fracture     | Percutaneous kyphoplasty    |
| 88  | 74 | Female | -2.3 | L5 fragile fracture     | Percutaneous vertebroplasty |
| 89  | 73 | Female | -2.5 | T10/L4 fragile fracture | Percutaneous kyphoplasty    |
| 90  | 72 | Female | -2.6 | L1 fragile fracture     | Percutaneous kyphoplasty    |
| 91  | 70 | Male   | -2.1 | L1 fragile fracture     | Percutaneous vertebroplasty |
| 92  | 71 | Male   | -2.4 | L1 fragile fracture     | Percutaneous kyphoplasty    |
| 94  | 72 | Female | -3.1 | L4 fragile fracture     | Percutaneous vertebroplasty |
| 94  | 73 | Male   | -2.8 | L5 fragile fracture     | Percutaneous kyphoplasty    |
| 95  | 75 | Male   | -3.2 | T7 fragile fracture     | Percutaneous kyphoplasty    |
| 96  | 79 | Female | -4.1 | T12 fragile fracture    | Percutaneous kyphoplasty    |
| 97  | 78 | Female | -3.4 | L1 fragile fracture     | Percutaneous kyphoplasty    |
| 98  | 77 | Male   | -2.8 | L1 fragile fracture     | Percutaneous kyphoplasty    |
| 99  | 72 | Female | -2.4 | L4 fragile fracture     | Percutaneous vertebroplasty |
| 100 | 77 | Male   | -3.6 | T10 fragile fracture    | Percutaneous kyphoplasty    |
| 101 | 78 | Female | -3.8 | T12 fragile fracture    | Percutaneous kyphoplasty    |
| 102 | 71 | Female | -2.4 | L2 fragile fracture     | Percutaneous vertebroplasty |

---

---

|     |    |        |      |                         |                             |
|-----|----|--------|------|-------------------------|-----------------------------|
| 103 | 70 | Male   | -2.5 | L3 fragile fracture     | Percutaneous kyphoplasty    |
| 104 | 74 | Female | -3.1 | L3 fragile fracture     | Percutaneous kyphoplasty    |
| 105 | 73 | Female | -2.6 | L4 fragile fracture     | Percutaneous kyphoplasty    |
| 106 | 75 | Male   | -2.5 | T11/L2 fragile fracture | Percutaneous kyphoplasty    |
| 107 | 76 | Male   | -2.6 | T9 fragile fracture     | Percutaneous kyphoplasty    |
| 108 | 75 | Female | -3.2 | L1 fragile fracture     | Percutaneous kyphoplasty    |
| 109 | 71 | Female | -2.5 | L3 fragile fracture     | Percutaneous kyphoplasty    |
| 110 | 77 | Male   | -3.1 | L2 fragile fracture     | Percutaneous kyphoplasty    |
| 111 | 78 | Male   | -2.6 | L4 fragile fracture     | Percutaneous kyphoplasty    |
| 112 | 75 | Male   | -3.8 | L4 fragile fracture     | Percutaneous kyphoplasty    |
| 113 | 79 | Female | -3.4 | T10/L4 fragile fracture | Percutaneous kyphoplasty    |
| 114 | 73 | Female | -2.4 | L1 fragile fracture     | Percutaneous vertebroplasty |
| 115 | 71 | Male   | -2.5 | L2 fragile fracture     | Percutaneous kyphoplasty    |
| 116 | 70 | Female | -1.9 | L3 fragile fracture     | Percutaneous vertebroplasty |
| 117 | 70 | Female | -2.5 | L3 fragile fracture     | Percutaneous kyphoplasty    |
| 118 | 78 | Male   | -2.7 | T11/L3 fragile fracture | Percutaneous kyphoplasty    |
| 119 | 76 | Female | -3.2 | L2 fragile fracture     | Percutaneous kyphoplasty    |
| 120 | 78 | Female | -2.7 | L3 fragile fracture     | Percutaneous kyphoplasty    |
| 121 | 71 | Male   | -2.5 | L2 fragile fracture     | Percutaneous kyphoplasty    |
| 122 | 77 | Female | -2.5 | L4 fragile fracture     | Percutaneous kyphoplasty    |
| 123 | 76 | Female | -2.8 | L4 fragile fracture     | Percutaneous kyphoplasty    |
| 124 | 78 | Female | -2.5 | L1/L3 fragile fracture  | Percutaneous kyphoplasty    |
| 125 | 77 | Male   | -3.1 | L2 fragile fracture     | Percutaneous kyphoplasty    |
| 126 | 74 | Female | -2.7 | L2/L5 fragile fracture  | Percutaneous kyphoplasty    |
| 127 | 73 | Female | -2.6 | L1 fragile fracture     | Percutaneous kyphoplasty    |
| 128 | 72 | Female | -2.2 | T12 fragile fracture    | Percutaneous kyphoplasty    |

---

---

|     |    |        |      |                         |                             |
|-----|----|--------|------|-------------------------|-----------------------------|
| 129 | 72 | Female | -2.1 | T11/L3 fragile fracture | Percutaneous vertebroplasty |
| 130 | 71 | Male   | -2.6 | T12 fragile fracture    | Percutaneous kyphoplasty    |
| 131 | 73 | Female | -2.5 | T11 fragile fracture    | Percutaneous kyphoplasty    |
| 132 | 73 | Female | -2.3 | T12 fragile fracture    | Percutaneous kyphoplasty    |
| 133 | 78 | Male   | -2.4 | L1 fragile fracture     | Percutaneous kyphoplasty    |
| 134 | 79 | Female | -4.2 | L2 fragile fracture     | Percutaneous kyphoplasty    |
| 135 | 76 | Male   | -2.5 | L3 fragile fracture     | Percutaneous kyphoplasty    |
| 136 | 75 | Male   | -2.2 | L2/L4 fragile fracture  | Percutaneous vertebroplasty |
| 137 | 78 | Female | -2.1 | L2/L5 fragile fracture  | Percutaneous vertebroplasty |
| 138 | 77 | Male   | -3.5 | T8 fragile fracture     | Percutaneous kyphoplasty    |
| 139 | 75 | Female | -2.5 | T10 fragile fracture    | Percutaneous kyphoplasty    |
| 140 | 74 | Female | -2.7 | L1 fragile fracture     | Percutaneous kyphoplasty    |
| 141 | 76 | Female | -2.8 | L2/L4 fragile fracture  | Percutaneous kyphoplasty    |
| 142 | 79 | Male   | -3.4 | L3 fragile fracture     | Percutaneous kyphoplasty    |
| 143 | 78 | Male   | -2.5 | L2 fragile fracture     | Percutaneous kyphoplasty    |
| 144 | 74 | Female | -2.4 | L2 fragile fracture     | Percutaneous kyphoplasty    |
| 145 | 73 | Female | -2.6 | L1 fragile fracture     | Percutaneous kyphoplasty    |
| 146 | 72 | Male   | -2.4 | T12 fragile fracture    | Percutaneous kyphoplasty    |
| 147 | 71 | Female | -2.2 | T12/L2 fragile fracture | Percutaneous vertebroplasty |
| 148 | 78 | Male   | -2.4 | T11 fragile fracture    | Percutaneous vertebroplasty |
| 149 | 79 | Male   | -2.8 | L2 fragile fracture     | Percutaneous kyphoplasty    |
| 150 | 75 | Female | -2.4 | L2 fragile fracture     | Percutaneous kyphoplasty    |
| 151 | 31 | Male   | -0.4 | Traumatic VCF (L1)      | Internal fixation           |
| 152 | 30 | Male   | 0.8  | Traumatic VCF (T12)     | Internal fixation           |
| 153 | 30 | Male   | 0.4  | Traumatic VCF (L2)      | Conservative treatment      |
| 154 | 31 | Male   | -0.2 | Traumatic VCF (L2)      | Internal fixation           |

---



---

|     |    |        |      |                        |                        |
|-----|----|--------|------|------------------------|------------------------|
| 155 | 35 | Female | 0.7  | Traumatic VCF (T12)    | Internal fixation      |
| 156 | 37 | Male   | -0.5 | Traumatic VCF (T12)    | Internal fixation      |
| 157 | 32 | Female | 0.7  | Traumatic VCF (L2)     | Internal fixation      |
| 158 | 34 | Female | 0.2  | Traumatic VCF (L3)     | Internal fixation      |
| 159 | 30 | Male   | 1.0  | Traumatic VCF (T11/L2) | Internal fixation      |
| 160 | 36 | Male   | -0.4 | Traumatic VCF (L1)     | Internal fixation      |
| 161 | 34 | Male   | 0.6  | Traumatic VCF (L1)     | Conservative treatment |
| 162 | 33 | Female | 0.7  | Traumatic VCF (L2)     | Internal fixation      |
| 163 | 38 | Female | -1.0 | Traumatic VCF (T12)    | Internal fixation      |
| 164 | 33 | Male   | -0.4 | Traumatic VCF (T12/L2) | Internal fixation      |
| 165 | 33 | Female | -0.2 | Traumatic VCF (L2)     | Internal fixation      |
| 166 | 31 | Female | 0.6  | Traumatic VCF (L3)     | Conservative treatment |
| 167 | 32 | Female | -0.2 | Traumatic VCF (L1)     | Internal fixation      |
| 168 | 36 | Male   | 0.6  | Traumatic VCF (L2)     | Internal fixation      |
| 169 | 33 | Male   | -0.1 | Traumatic VCF (T11/L3) | Internal fixation      |
| 170 | 39 | Male   | -0.8 | Traumatic VCF (L1)     | Internal fixation      |
| 171 | 35 | Female | -0.5 | Traumatic VCF (L2)     | Internal fixation      |
| 172 | 31 | Male   | 1.0  | Traumatic VCF (L3)     | Conservative treatment |
| 173 | 39 | Male   | 0.2  | Traumatic VCF (L1)     | Internal fixation      |
| 174 | 37 | Male   | -0.3 | Traumatic VCF (L1/L2)  | Internal fixation      |
| 175 | 37 | Female | -0.5 | Traumatic VCF (L2)     | Internal fixation      |
| 176 | 39 | Female | -1.4 | Traumatic VCF (L3)     | Internal fixation      |
| 177 | 30 | Male   | 0.6  | Traumatic VCF (L2)     | Conservative treatment |
| 178 | 33 | Male   | -0.2 | Traumatic VCF (L2)     | Conservative treatment |
| 179 | 35 | Female | 0.6  | Traumatic VCF (L1)     | Internal fixation      |
| 180 | 36 | Male   | -0.2 | Traumatic VCF (L2)     | Internal fixation      |

---

---

|     |    |        |      |                        |                        |
|-----|----|--------|------|------------------------|------------------------|
| 181 | 38 | Male   | -0.7 | Traumatic VCF (L2)     | Internal fixation      |
| 182 | 38 | Male   | 0.2  | Traumatic VCF (L1)     | Internal fixation      |
| 183 | 39 | Female | -1.2 | Traumatic VCF (L4)     | Internal fixation      |
| 184 | 33 | Female | 0.6  | Traumatic VCF (L1)     | Conservative treatment |
| 185 | 30 | Male   | 1.5  | Traumatic VCF (T12)    | Conservative treatment |
| 186 | 36 | Male   | -0.3 | Traumatic VCF (L3)     | Internal fixation      |
| 187 | 34 | Male   | 0.5  | Traumatic VCF (T11/L2) | Internal fixation      |
| 188 | 31 | Female | -0.9 | Traumatic VCF (L1)     | Internal fixation      |
| 189 | 39 | Male   | 0.2  | Traumatic VCF (L2)     | Internal fixation      |
| 190 | 38 | Male   | -0.3 | Traumatic VCF (L1)     | Internal fixation      |
| 191 | 32 | Female | 0.8  | Traumatic VCF (L2)     | Conservative treatment |

---

**Supplementary Table 2. Clinical features of aged osteoporotic LSS and adult LDH patients**

| Patient No. | Age | Gender | T score for BMD at lumbar spine | Diagnosis                                                   | Surgical operation            |
|-------------|-----|--------|---------------------------------|-------------------------------------------------------------|-------------------------------|
| 1           | 62  | Female | -2.3                            | Lumbar spinal stenosis (L4/5)                               | Laminectomy and spinal fusion |
| 2           | 67  | Female | -2.5                            | Lumbar spinal stenosis and disc herniation (L4/5)           | Laminectomy and spinal fusion |
| 3           | 68  | Male   | -2.6                            | Lumbar spinal stenosis (L5/S1)                              | Laminectomy and spinal fusion |
| 4           | 64  | Female | -2.3                            | Lumbar spinal stenosis (L4/5)                               | Laminectomy and spinal fusion |
| 5           | 66  | Female | -2.5                            | Lumbar spinal stenosis and disc herniation (L4/5)           | Laminectomy and spinal fusion |
| 6           | 65  | Male   | -2.2                            | Lumbar spinal stenosis and disc herniation (L4/5 and L5/S1) | Laminectomy and spinal fusion |
| 7           | 66  | Female | -2.5                            | Lumbar spinal stenosis (L5/S1)                              | Laminectomy and spinal fusion |
| 8           | 68  | Male   | -2.8                            | Lumbar spinal stenosis (L5/S1)                              | Laminectomy and spinal fusion |
| 9           | 60  | Female | -2.5                            | Lumbar spinal stenosis (L4/5)                               | Laminectomy and spinal fusion |
| 10          | 68  | Male   | -2.5                            | Lumbar spinal stenosis (L3/4 and L4/5)                      | Laminectomy and spinal fusion |
| 11          | 69  | Female | -3.4                            | Lumbar spinal stenosis (L4/5 and L5/S1)                     | Laminectomy and spinal fusion |
| 12          | 68  | Male   | -2.3                            | Lumbar spinal stenosis and disc herniation (L5/S1)          | Laminectomy and spinal fusion |
| 13          | 64  | Female | -2.5                            | Lumbar spinal stenosis and disc herniation (L4/5)           | Laminectomy and spinal fusion |
| 14          | 63  | Female | -2.7                            | Lumbar spinal stenosis (L4/5 and L5/S1)                     | Laminectomy and spinal fusion |
| 15          | 61  | Female | -2.3                            | Lumbar spinal stenosis and disc herniation (L4/5 and L5/S1) | Laminectomy and spinal fusion |
| 16          | 66  | Male   | -2.0                            | Lumbar spinal stenosis (L4/5)                               | Laminectomy and spinal fusion |
| 17          | 68  | Female | -2.4                            | Lumbar spinal stenosis (L4/5)                               | Laminectomy and spinal fusion |
| 18          | 67  | Female | -1.9                            | Lumbar spinal stenosis (L4/5)                               | Laminectomy and spinal fusion |
| 19          | 60  | Male   | -2.4                            | Lumbar spinal stenosis (L4/5 and L5/S1)                     | Laminectomy and spinal fusion |
| 20          | 63  | Female | -2.5                            | Lumbar spinal stenosis and disc herniation (L3/4 and L4/5)  | Laminectomy and spinal fusion |
| 21          | 69  | Female | -2.3                            | Lumbar spinal stenosis (L4/5)                               | Laminectomy and spinal fusion |
| 22          | 68  | Female | -2.5                            | Lumbar spinal stenosis (L5/S1)                              | Laminectomy and spinal fusion |
| 23          | 62  | Female | -2.6                            | Lumbar spinal stenosis (L4/5 and L5/S1)                     | Laminectomy and spinal fusion |

|    |    |        |      |                                                             |                               |
|----|----|--------|------|-------------------------------------------------------------|-------------------------------|
| 24 | 63 | Male   | -2.1 | Lumbar spinal stenosis (L4/5)                               | Laminectomy and spinal fusion |
| 25 | 63 | Male   | -1.8 | Lumbar spinal stenosis and disc herniation (L5/S1)          | Laminectomy and spinal fusion |
| 26 | 65 | Female | -2.4 | Lumbar spinal stenosis and disc herniation (L4/5 and L5/S1) | Laminectomy and spinal fusion |
| 27 | 65 | Female | -2.7 | Lumbar spinal stenosis (L4/5)                               | Laminectomy and spinal fusion |
| 28 | 68 | Male   | -2.5 | Lumbar spinal stenosis and disc herniation (L4/5 and L5/S1) | Laminectomy and spinal fusion |
| 29 | 69 | Male   | -3.1 | Lumbar spinal stenosis and disc herniation (L4/5)           | Laminectomy and spinal fusion |
| 30 | 61 | Female | -2.6 | Lumbar spinal stenosis (L4/5)                               | Laminectomy and spinal fusion |
| 31 | 67 | Male   | -2.3 | Lumbar spinal stenosis and disc herniation (L3/4 and L4/5)  | Laminectomy and spinal fusion |
| 32 | 62 | Female | -2.2 | Lumbar spinal stenosis and disc herniation (L4/5)           | Laminectomy and spinal fusion |
| 33 | 62 | Female | -2.2 | Lumbar spinal stenosis (L3/4 and L4/5)                      | Laminectomy and spinal fusion |
| 34 | 64 | Female | -2.4 | Lumbar spinal stenosis (L5/S1)                              | Laminectomy and spinal fusion |
| 35 | 65 | Female | -2.5 | Lumbar spinal stenosis (L5/S1)                              | Laminectomy and spinal fusion |
| 36 | 66 | Male   | -2.9 | Lumbar spinal stenosis and disc herniation (L4/5)           | Laminectomy and spinal fusion |
| 37 | 61 | Male   | -2.3 | Lumbar spinal stenosis and disc herniation (L4/5)           | Laminectomy and spinal fusion |
| 38 | 68 | Female | -2.5 | Lumbar spinal stenosis and disc herniation (L4/5 and L5/S1) | Laminectomy and spinal fusion |
| 39 | 69 | Male   | -2.3 | Lumbar spinal stenosis (L5/S1)                              | Laminectomy and spinal fusion |
| 40 | 62 | Female | -2.5 | Lumbar spinal stenosis (L4/5)                               | Laminectomy and spinal fusion |
| 41 | 64 | Male   | -1.8 | Lumbar spinal stenosis and disc herniation (L5/S1)          | Laminectomy and spinal fusion |
| 42 | 65 | Female | -2.5 | Lumbar spinal stenosis and disc herniation (L4/5)           | Laminectomy and spinal fusion |
| 43 | 65 | Female | -2.4 | Lumbar spinal stenosis (L5/S1)                              | Laminectomy and spinal fusion |
| 44 | 67 | Male   | -3.3 | Lumbar spinal stenosis (L4/5)                               | Laminectomy and spinal fusion |
| 45 | 68 | Female | -2.8 | Lumbar spinal stenosis (L4/5)                               | Laminectomy and spinal fusion |
| 46 | 68 | Female | -2.5 | Lumbar spinal stenosis and disc herniation (L4/5 and L5/S1) | Laminectomy and spinal fusion |
| 47 | 69 | Male   | -2.7 | Lumbar spinal stenosis (L4/5)                               | Laminectomy and spinal fusion |
| 48 | 69 | Male   | -2.2 | Lumbar spinal stenosis (L4/5)                               | Laminectomy and spinal fusion |
| 49 | 65 | Female | -2.5 | Lumbar spinal stenosis (L3/4 and L4/5)                      | Laminectomy and spinal fusion |

|    |    |        |      |                                                             |                               |
|----|----|--------|------|-------------------------------------------------------------|-------------------------------|
| 50 | 65 | Male   | -1.8 | Lumbar spinal stenosis (L4/5)                               | Laminectomy and spinal fusion |
| 51 | 64 | Male   | -2.0 | Lumbar spinal stenosis and disc herniation (L 3/4 and L4/5) | Laminectomy and spinal fusion |
| 52 | 64 | Female | -2.5 | Lumbar spinal stenosis and disc herniation (L4/5 and L5/S1) | Laminectomy and spinal fusion |
| 53 | 65 | Female | -2.5 | Lumbar spinal stenosis (L4/5)                               | Laminectomy and spinal fusion |
| 54 | 68 | Female | -2.5 | Lumbar spinal stenosis (L4/5)                               | Laminectomy and spinal fusion |
| 55 | 66 | Male   | -2.2 | Lumbar spinal stenosis (L4/5 and L5/S1)                     | Laminectomy and spinal fusion |
| 56 | 65 | Female | -2.5 | Lumbar spinal stenosis (L4/5)                               | Laminectomy and spinal fusion |
| 57 | 63 | Male   | -2.8 | Lumbar spinal stenosis and disc herniation (L4/5 and L5/S1) | Laminectomy and spinal fusion |
| 58 | 69 | Female | -2.3 | Lumbar spinal stenosis (L4/5)                               | Laminectomy and spinal fusion |
| 59 | 63 | Female | -2.5 | Lumbar spinal stenosis and disc herniation (L4/5 and L5/S1) | Laminectomy and spinal fusion |
| 60 | 62 | Female | -1.9 | Lumbar spinal stenosis (L5/S1)                              | Laminectomy and spinal fusion |
| 61 | 68 | Male   | -2.7 | Lumbar spinal stenosis (L4/5)                               | Laminectomy and spinal fusion |
| 62 | 65 | Female | -2.4 | Lumbar spinal stenosis (L5/S1)                              | Laminectomy and spinal fusion |
| 63 | 62 | Female | -2.5 | Lumbar spinal stenosis (L4/5)                               | Laminectomy and spinal fusion |
| 64 | 68 | Female | -2.3 | Lumbar spinal stenosis (L4/5)                               | Laminectomy and spinal fusion |
| 65 | 67 | Male   | -2.6 | Lumbar spinal stenosis (L5/S1)                              | Laminectomy and spinal fusion |
| 66 | 67 | Male   | -2.5 | Lumbar spinal stenosis and disc herniation (L4/5 and L5/S1) | Laminectomy and spinal fusion |
| 67 | 66 | Female | -2.4 | Lumbar spinal stenosis (L4/5)                               | Laminectomy and spinal fusion |
| 68 | 69 | Female | -2.6 | Lumbar spinal stenosis (L4/5)                               | Laminectomy and spinal fusion |
| 69 | 64 | Female | -2.8 | Lumbar spinal stenosis (L4/5 and L5/S1)                     | Laminectomy and spinal fusion |
| 70 | 67 | Male   | -3.0 | Lumbar spinal stenosis (L5/S1)                              | Laminectomy and spinal fusion |
| 71 | 63 | Male   | -2.4 | Lumbar spinal stenosis (L4/5)                               | Laminectomy and spinal fusion |
| 72 | 68 | Female | -2.2 | Lumbar spinal stenosis (L5/S1)                              | Laminectomy and spinal fusion |
| 73 | 69 | Male   | -2.7 | Lumbar spinal stenosis and disc herniation (L4/5)           | Laminectomy and spinal fusion |
| 74 | 66 | Female | -2.5 | Lumbar spinal stenosis (L4/5)                               | Laminectomy and spinal fusion |
| 75 | 37 | Male   | -0.4 | Disc herniation (L4/5)                                      | Disctomy and spinal fusion    |

|     |    |        |      |                                                    |                               |
|-----|----|--------|------|----------------------------------------------------|-------------------------------|
| 76  | 38 | Male   | -0.2 | Lumbar spinal stenosis and disc herniation (L4/5)  | Laminectomy and spinal fusion |
| 77  | 35 | Female | 0.4  | L5/S1 disc herniation                              | Disctomy and spinal fusion    |
| 78  | 39 | Male   | -0.3 | Lumbar spinal stenosis and disc herniation (L4/5)  | Laminectomy and spinal fusion |
| 79  | 39 | Female | -0.6 | Lumbar spinal stenosis and disc herniation (L5/S1) | Laminectomy and spinal fusion |
| 80  | 32 | Male   | 1.2  | L4/5 disc herniation                               | Disctomy and spinal fusion    |
| 81  | 30 | Male   | 1.4  | L5/S1 disc herniation                              | Disctomy and spinal fusion    |
| 82  | 33 | Female | -0.4 | L4/5 disc herniation                               | Disctomy and spinal fusion    |
| 83  | 35 | Female | -0.8 | L4/5 disc herniation                               | Disctomy and spinal fusion    |
| 84  | 39 | Female | -1.2 | Lumbar spinal stenosis and disc herniation (L4/5)  | Laminectomy and spinal fusion |
| 85  | 31 | Male   | 0.8  | L5/S1 disc herniation                              | Disctomy and spinal fusion    |
| 86  | 31 | Female | 0.4  | L4/5 disc herniation                               | Disctomy and spinal fusion    |
| 87  | 34 | Male   | 0.5  | L4/5 disc herniation                               | Disctomy and spinal fusion    |
| 88  | 39 | Male   | -0.7 | Lumbar spinal stenosis and disc herniation (L4/5)  | Laminectomy and spinal fusion |
| 89  | 38 | Female | -0.4 | Lumbar spinal stenosis and disc herniation (L4/5)  | Laminectomy and spinal fusion |
| 90  | 32 | Male   | 0.1  | L5/S1 disc herniation                              | Disctomy and spinal fusion    |
| 91  | 33 | Female | 0.3  | L4/5 disc herniation                               | Disctomy and spinal fusion    |
| 92  | 32 | Female | 0.8  | L5/S1 disc herniation                              | Disctomy and spinal fusion    |
| 93  | 38 | Male   | -0.4 | L4/5 disc herniation                               | Disctomy and spinal fusion    |
| 94  | 37 | Male   | 0.6  | L4/5 disc herniation                               | Disctomy and spinal fusion    |
| 95  | 39 | Male   | -0.9 | Lumbar spinal stenosis and disc herniation (L4/5)  | Laminectomy and spinal fusion |
| 96  | 33 | Male   | 1.2  | L4/5 disc herniation                               | Disctomy and spinal fusion    |
| 97  | 37 | Male   | -0.2 | L4/5 disc herniation                               | Disctomy and spinal fusion    |
| 98  | 35 | Male   | 0.8  | L5/S1 disc herniation                              | Disctomy and spinal fusion    |
| 99  | 38 | Female | -1.4 | Lumbar spinal stenosis and disc herniation (L4/5)  | Laminectomy and spinal fusion |
| 100 | 34 | Male   | 0.6  | L4/5 disc herniation                               | Disctomy and spinal fusion    |
| 101 | 35 | Female | -0.7 | L5/S1 disc herniation                              | Disctomy and spinal fusion    |

|     |    |        |      |                                                    |                               |
|-----|----|--------|------|----------------------------------------------------|-------------------------------|
| 102 | 32 | Male   | 1.0  | L4/5 disc herniation                               | Disctomy and spinal fusion    |
| 103 | 39 | Male   | -1.5 | Lumbar spinal stenosis and disc herniation (L5/S1) | Laminectomy and spinal fusion |
| 104 | 34 | Male   | 0.7  | L4/5 disc herniation                               | Disctomy and spinal fusion    |
| 105 | 34 | Female | 0.2  | L4/5 disc herniation                               | Disctomy and spinal fusion    |
| 106 | 36 | Male   | -0.3 | L4/5 disc herniation                               | Disctomy and spinal fusion    |
| 107 | 38 | Female | -1.3 | Lumbar spinal stenosis and disc herniation (L4/5)  | Laminectomy and spinal fusion |
| 108 | 34 | Male   | 0.5  | L4/5 disc herniation                               | Disctomy and spinal fusion    |
| 109 | 35 | Male   | -0.4 | L5/S1 disc herniation                              | Disctomy and spinal fusion    |
| 110 | 36 | Female | -1.1 | L4/5 disc herniation                               | Disctomy and spinal fusion    |
| 111 | 39 | Male   | -0.8 | Lumbar spinal stenosis and disc herniation (L4/5)  | Laminectomy and spinal fusion |
| 112 | 31 | Male   | 1.4  | L4/5 disc herniation                               | Disctomy and spinal fusion    |
| 113 | 32 | Female | -0.3 | L4/5 disc herniation                               | Disctomy and spinal fusion    |

**Supplementary Table 3. Top 100 small molecules selected from Apollo Scientific library**

| <b>Zinc Code</b> | <b>Affinity</b> | <b>Lipinski Score</b> | <b>Lead Score</b> | <b>Rank</b> | <b>Molecule Information</b>                                                                         |
|------------------|-----------------|-----------------------|-------------------|-------------|-----------------------------------------------------------------------------------------------------|
| ZINC03852644     | -7.6            | 7                     | 5                 | 1           | <a href="http://zinc.docking.org/substance/3852644">http://zinc.docking.org/substance/3852644</a>   |
| ZINC04277068     | -7.4            | 7                     | 5                 | 2           | <a href="http://zinc.docking.org/substance/4277068">http://zinc.docking.org/substance/4277068</a>   |
| ZINC19313632     | -7.4            | 7                     | 5                 | 3           | <a href="http://zinc.docking.org/substance/19313632">http://zinc.docking.org/substance/19313632</a> |
| ZINC00154376     | -7.4            | 7                     | 5                 | 4           | <a href="http://zinc.docking.org/substance/154376">http://zinc.docking.org/substance/154376</a>     |
| ZINC00089168     | -7.4            | 7                     | 5                 | 5           | <a href="http://zinc.docking.org/substance/89168">http://zinc.docking.org/substance/89168</a>       |
| ZINC02574073     | -7.3            | 7                     | 5                 | 6           | <a href="http://zinc.docking.org/substance/2574073">http://zinc.docking.org/substance/2574073</a>   |
| ZINC02577549     | -7.3            | 7                     | 5                 | 7           | <a href="http://zinc.docking.org/substance/2577549">http://zinc.docking.org/substance/2577549</a>   |
| ZINC00096648     | -7.3            | 7                     | 5                 | 8           | <a href="http://zinc.docking.org/substance/96648">http://zinc.docking.org/substance/96648</a>       |
| ZINC05278453     | -7.2            | 7                     | 5                 | 9           | <a href="http://zinc.docking.org/substance/5278453">http://zinc.docking.org/substance/5278453</a>   |
| ZINC00084031     | -7.2            | 7                     | 5                 | 10          | <a href="http://zinc.docking.org/substance/84031">http://zinc.docking.org/substance/84031</a>       |
| ZINC06740830     | -7.2            | 7                     | 5                 | 11          | <a href="http://zinc.docking.org/substance/6740830">http://zinc.docking.org/substance/6740830</a>   |
| ZINC06732140     | -7.2            | 7                     | 5                 | 12          | <a href="http://zinc.docking.org/substance/6732140">http://zinc.docking.org/substance/6732140</a>   |
| ZINC00137445     | -7.2            | 7                     | 5                 | 13          | <a href="http://zinc.docking.org/substance/137445">http://zinc.docking.org/substance/137445</a>     |
| ZINC02513020     | -7.2            | 7                     | 5                 | 14          | <a href="http://zinc.docking.org/substance/2513020">http://zinc.docking.org/substance/2513020</a>   |
| ZINC19850476     | -7.2            | 7                     | 5                 | 15          | <a href="http://zinc.docking.org/substance/19850476">http://zinc.docking.org/substance/19850476</a> |
| ZINC02584341     | -7.2            | 7                     | 5                 | 16          | <a href="http://zinc.docking.org/substance/2584341">http://zinc.docking.org/substance/2584341</a>   |
| ZINC02574069     | -7.2            | 7                     | 5                 | 17          | <a href="http://zinc.docking.org/substance/2574069">http://zinc.docking.org/substance/2574069</a>   |
| ZINC08577839     | -7.2            | 7                     | 5                 | 18          | <a href="http://zinc.docking.org/substance/8577839">http://zinc.docking.org/substance/8577839</a>   |
| ZINC00160525     | -7.1            | 7                     | 5                 | 19          | <a href="http://zinc.docking.org/substance/160525">http://zinc.docking.org/substance/160525</a>     |
| ZINC00162571     | -7.1            | 7                     | 5                 | 20          | <a href="http://zinc.docking.org/substance/162571">http://zinc.docking.org/substance/162571</a>     |
| ZINC00150799     | -7.1            | 7                     | 5                 | 21          | <a href="http://zinc.docking.org/substance/150799">http://zinc.docking.org/substance/150799</a>     |
| ZINC12368464     | -7.1            | 7                     | 5                 | 22          | <a href="http://zinc.docking.org/substance/12368464">http://zinc.docking.org/substance/12368464</a> |
| ZINC05900737     | -7.1            | 7                     | 5                 | 23          | <a href="http://zinc.docking.org/substance/5900737">http://zinc.docking.org/substance/5900737</a>   |
| ZINC16159954     | -7.1            | 7                     | 5                 | 24          | <a href="http://zinc.docking.org/substance/16159954">http://zinc.docking.org/substance/16159954</a> |



|              |      |   |   |    |                                                                                                     |
|--------------|------|---|---|----|-----------------------------------------------------------------------------------------------------|
| ZINC08729782 | -7.1 | 7 | 5 | 25 | <a href="http://zinc.docking.org/substance/8729782">http://zinc.docking.org/substance/8729782</a>   |
| ZINC12336371 | -7.1 | 7 | 5 | 26 | <a href="http://zinc.docking.org/substance/12336371">http://zinc.docking.org/substance/12336371</a> |
| ZINC20391245 | -7.1 | 7 | 5 | 27 | <a href="http://zinc.docking.org/substance/20391245">http://zinc.docking.org/substance/20391245</a> |
| ZINC01529772 | -7.1 | 7 | 5 | 28 | <a href="http://zinc.docking.org/substance/1529772">http://zinc.docking.org/substance/1529772</a>   |
| ZINC02756301 | -7.1 | 7 | 5 | 29 | <a href="http://zinc.docking.org/substance/2756301">http://zinc.docking.org/substance/2756301</a>   |
| ZINC02243169 | -7.1 | 7 | 5 | 30 | <a href="http://zinc.docking.org/substance/2243169">http://zinc.docking.org/substance/2243169</a>   |
| ZINC02513039 | -7.1 | 7 | 5 | 31 | <a href="http://zinc.docking.org/substance/2513039">http://zinc.docking.org/substance/2513039</a>   |
| ZINC02574059 | -7.1 | 7 | 5 | 32 | <a href="http://zinc.docking.org/substance/2574059">http://zinc.docking.org/substance/2574059</a>   |
| ZINC03883871 | -7.1 | 7 | 5 | 33 | <a href="http://zinc.docking.org/substance/3883871">http://zinc.docking.org/substance/3883871</a>   |
| ZINC02568865 | -7.1 | 7 | 5 | 34 | <a href="http://zinc.docking.org/substance/2568865">http://zinc.docking.org/substance/2568865</a>   |
| ZINC02528960 | -7.1 | 7 | 5 | 35 | <a href="http://zinc.docking.org/substance/2528960">http://zinc.docking.org/substance/2528960</a>   |
| ZINC02574057 | -7.1 | 7 | 5 | 36 | <a href="http://zinc.docking.org/substance/2574057">http://zinc.docking.org/substance/2574057</a>   |
| ZINC00163794 | -7   | 7 | 5 | 37 | <a href="http://zinc.docking.org/substance/163794">http://zinc.docking.org/substance/163794</a>     |
| ZINC08729986 | -7   | 7 | 5 | 38 | <a href="http://zinc.docking.org/substance/8729986">http://zinc.docking.org/substance/8729986</a>   |
| ZINC18100358 | -7   | 7 | 5 | 39 | <a href="http://zinc.docking.org/substance/18100358">http://zinc.docking.org/substance/18100358</a> |
| ZINC00097218 | -7   | 7 | 5 | 40 | <a href="http://zinc.docking.org/substance/97218">http://zinc.docking.org/substance/97218</a>       |
| ZINC00164277 | -7   | 7 | 5 | 41 | <a href="http://zinc.docking.org/substance/164277">http://zinc.docking.org/substance/164277</a>     |
| ZINC02559799 | -7   | 7 | 5 | 42 | <a href="http://zinc.docking.org/substance/2559799">http://zinc.docking.org/substance/2559799</a>   |
| ZINC00111037 | -7   | 7 | 5 | 43 | <a href="http://zinc.docking.org/substance/111037">http://zinc.docking.org/substance/111037</a>     |
| ZINC02572704 | -7   | 7 | 5 | 44 | <a href="http://zinc.docking.org/substance/2572704">http://zinc.docking.org/substance/2572704</a>   |
| ZINC15020910 | -7   | 7 | 5 | 45 | <a href="http://zinc.docking.org/substance/15020910">http://zinc.docking.org/substance/15020910</a> |
| ZINC02565512 | -7   | 7 | 5 | 46 | <a href="http://zinc.docking.org/substance/2565512">http://zinc.docking.org/substance/2565512</a>   |
| ZINC02574072 | -7   | 7 | 5 | 47 | <a href="http://zinc.docking.org/substance/2574072">http://zinc.docking.org/substance/2574072</a>   |
| ZINC02574075 | -7   | 7 | 5 | 48 | <a href="http://zinc.docking.org/substance/2574075">http://zinc.docking.org/substance/2574075</a>   |
| ZINC02574862 | -7   | 7 | 5 | 49 | <a href="http://zinc.docking.org/substance/2574862">http://zinc.docking.org/substance/2574862</a>   |
| ZINC00168462 | -7   | 7 | 5 | 50 | <a href="http://zinc.docking.org/substance/168462">http://zinc.docking.org/substance/168462</a>     |

|              |      |   |   |    |                                                                                                     |
|--------------|------|---|---|----|-----------------------------------------------------------------------------------------------------|
| ZINC00168826 | -7   | 7 | 5 | 51 | <a href="http://zinc.docking.org/substance/168826">http://zinc.docking.org/substance/168826</a>     |
| ZINC02522308 | -7   | 7 | 5 | 52 | <a href="http://zinc.docking.org/substance/2522308">http://zinc.docking.org/substance/2522308</a>   |
| ZINC33378823 | -7   | 7 | 5 | 53 | <a href="http://zinc.docking.org/substance/33378823">http://zinc.docking.org/substance/33378823</a> |
| ZINC19850948 | -7   | 7 | 5 | 54 | <a href="http://zinc.docking.org/substance/19850948">http://zinc.docking.org/substance/19850948</a> |
| ZINC33381070 | -7   | 7 | 5 | 55 | <a href="http://zinc.docking.org/substance/33381070">http://zinc.docking.org/substance/33381070</a> |
| ZINC00035539 | -7   | 7 | 5 | 56 | <a href="http://zinc.docking.org/substance/35539">http://zinc.docking.org/substance/35539</a>       |
| ZINC04419781 | -7   | 7 | 5 | 57 | <a href="http://zinc.docking.org/substance/4419781">http://zinc.docking.org/substance/4419781</a>   |
| ZINC00236402 | -7   | 7 | 5 | 58 | <a href="http://zinc.docking.org/substance/236402">http://zinc.docking.org/substance/236402</a>     |
| ZINC02512536 | -7   | 7 | 5 | 59 | <a href="http://zinc.docking.org/substance/2512536">http://zinc.docking.org/substance/2512536</a>   |
| ZINC00317836 | -7   | 7 | 5 | 60 | <a href="http://zinc.docking.org/substance/317836">http://zinc.docking.org/substance/317836</a>     |
| ZINC02509680 | -7   | 7 | 5 | 61 | <a href="http://zinc.docking.org/substance/2509680">http://zinc.docking.org/substance/2509680</a>   |
| ZINC04692806 | -7   | 7 | 5 | 62 | <a href="http://zinc.docking.org/substance/4692806">http://zinc.docking.org/substance/4692806</a>   |
| ZINC02382451 | -7   | 7 | 5 | 63 | <a href="http://zinc.docking.org/substance/2382451">http://zinc.docking.org/substance/2382451</a>   |
| ZINC06557742 | -7   | 7 | 5 | 64 | <a href="http://zinc.docking.org/substance/6557742">http://zinc.docking.org/substance/6557742</a>   |
| ZINC00155671 | -7   | 7 | 5 | 65 | <a href="http://zinc.docking.org/substance/155671">http://zinc.docking.org/substance/155671</a>     |
| ZINC06732250 | -7   | 7 | 5 | 66 | <a href="http://zinc.docking.org/substance/6732250">http://zinc.docking.org/substance/6732250</a>   |
| ZINC00166760 | -7   | 7 | 5 | 67 | <a href="http://zinc.docking.org/substance/166760">http://zinc.docking.org/substance/166760</a>     |
| ZINC00137063 | -6.9 | 7 | 5 | 68 | <a href="http://zinc.docking.org/substance/137063">http://zinc.docking.org/substance/137063</a>     |
| ZINC00152628 | -6.9 | 7 | 5 | 69 | <a href="http://zinc.docking.org/substance/152628">http://zinc.docking.org/substance/152628</a>     |
| ZINC36294169 | -6.9 | 7 | 5 | 70 | <a href="http://zinc.docking.org/substance/36294169">http://zinc.docking.org/substance/36294169</a> |
| ZINC02561081 | -6.9 | 7 | 5 | 71 | <a href="http://zinc.docking.org/substance/2561081">http://zinc.docking.org/substance/2561081</a>   |
| ZINC15020915 | -6.9 | 7 | 5 | 72 | <a href="http://zinc.docking.org/substance/15020915">http://zinc.docking.org/substance/15020915</a> |
| ZINC00157472 | -6.9 | 7 | 5 | 73 | <a href="http://zinc.docking.org/substance/157472">http://zinc.docking.org/substance/157472</a>     |
| ZINC00129045 | -6.9 | 7 | 5 | 74 | <a href="http://zinc.docking.org/substance/129045">http://zinc.docking.org/substance/129045</a>     |
| ZINC00158160 | -6.9 | 7 | 5 | 75 | <a href="http://zinc.docking.org/substance/158160">http://zinc.docking.org/substance/158160</a>     |
| ZINC02525620 | -6.9 | 7 | 5 | 76 | <a href="http://zinc.docking.org/substance/2525620">http://zinc.docking.org/substance/2525620</a>   |

|              |      |   |   |     |                                                                                                     |
|--------------|------|---|---|-----|-----------------------------------------------------------------------------------------------------|
| ZINC02525598 | -6.9 | 7 | 5 | 77  | <a href="http://zinc.docking.org/substance/2525598">http://zinc.docking.org/substance/2525598</a>   |
| ZINC19851200 | -6.9 | 7 | 5 | 78  | <a href="http://zinc.docking.org/substance/19851200">http://zinc.docking.org/substance/19851200</a> |
| ZINC02547487 | -6.9 | 7 | 5 | 79  | <a href="http://zinc.docking.org/substance/2547487">http://zinc.docking.org/substance/2547487</a>   |
| ZINC00162432 | -6.9 | 7 | 5 | 80  | <a href="http://zinc.docking.org/substance/162432">http://zinc.docking.org/substance/162432</a>     |
| ZINC02574058 | -6.9 | 7 | 5 | 81  | <a href="http://zinc.docking.org/substance/2574058">http://zinc.docking.org/substance/2574058</a>   |
| ZINC02574060 | -6.9 | 7 | 5 | 82  | <a href="http://zinc.docking.org/substance/2574060">http://zinc.docking.org/substance/2574060</a>   |
| ZINC02574067 | -6.9 | 7 | 5 | 83  | <a href="http://zinc.docking.org/substance/2574067">http://zinc.docking.org/substance/2574067</a>   |
| ZINC02574071 | -6.9 | 7 | 5 | 84  | <a href="http://zinc.docking.org/substance/2574071">http://zinc.docking.org/substance/2574071</a>   |
| ZINC00317837 | -6.9 | 7 | 5 | 85  | <a href="http://zinc.docking.org/substance/317837">http://zinc.docking.org/substance/317837</a>     |
| ZINC00404054 | -6.9 | 7 | 5 | 86  | <a href="http://zinc.docking.org/substance/404054">http://zinc.docking.org/substance/404054</a>     |
| ZINC00086535 | -6.9 | 7 | 5 | 87  | <a href="http://zinc.docking.org/substance/86535">http://zinc.docking.org/substance/86535</a>       |
| ZINC03883634 | -6.9 | 7 | 5 | 88  | <a href="http://zinc.docking.org/substance/3883634">http://zinc.docking.org/substance/3883634</a>   |
| ZINC01258204 | -6.9 | 7 | 5 | 89  | <a href="http://zinc.docking.org/substance/1258204">http://zinc.docking.org/substance/1258204</a>   |
| ZINC04222956 | -6.9 | 7 | 5 | 90  | <a href="http://zinc.docking.org/substance/4222956">http://zinc.docking.org/substance/4222956</a>   |
| ZINC00111588 | -6.9 | 7 | 5 | 91  | <a href="http://zinc.docking.org/substance/111588">http://zinc.docking.org/substance/111588</a>     |
| ZINC06732251 | -6.9 | 7 | 5 | 92  | <a href="http://zinc.docking.org/substance/6732251">http://zinc.docking.org/substance/6732251</a>   |
| ZINC06732139 | -6.9 | 7 | 5 | 93  | <a href="http://zinc.docking.org/substance/6732139">http://zinc.docking.org/substance/6732139</a>   |
| ZINC12957994 | -6.9 | 7 | 5 | 94  | <a href="http://zinc.docking.org/substance/12957994">http://zinc.docking.org/substance/12957994</a> |
| ZINC00153747 | -6.8 | 7 | 5 | 95  | <a href="http://zinc.docking.org/substance/153747">http://zinc.docking.org/substance/153747</a>     |
| ZINC02525750 | -6.8 | 7 | 5 | 96  | <a href="http://zinc.docking.org/substance/2525750">http://zinc.docking.org/substance/2525750</a>   |
| ZINC05934541 | -6.8 | 7 | 5 | 97  | <a href="http://zinc.docking.org/substance/5934541">http://zinc.docking.org/substance/5934541</a>   |
| ZINC02525668 | -6.8 | 7 | 5 | 98  | <a href="http://zinc.docking.org/substance/2525668">http://zinc.docking.org/substance/2525668</a>   |
| ZINC04202596 | -6.8 | 7 | 5 | 99  | <a href="http://zinc.docking.org/substance/4202596">http://zinc.docking.org/substance/4202596</a>   |
| ZINC04023716 | -6.8 | 7 | 5 | 100 | <a href="http://zinc.docking.org/substance/4023716">http://zinc.docking.org/substance/4023716</a>   |

---

**Supplementary Table 4. Theoretical parameters of interaction and residues involved**

| Mode | Affinity<br>(kcal/mol) | Dist from best mode |           | Residues         |
|------|------------------------|---------------------|-----------|------------------|
|      |                        | rmsd l.b.           | rmsd u.b. |                  |
| 1    | -7.2                   | 0.000               | 0.000     | G248, R289, Y297 |
| 2    | -6.0                   | 8.287               | 10.247    | R295, Y297       |
| 3    | -6.0                   | 8.272               | 12.431    | T291, R295, R289 |
| 4    | -5.8                   | 13.938              | 15.463    | W262, R295, R269 |
| 5    | -5.6                   | 6.923               | 9.494     | Y297, R289       |
| 6    | -5.3                   | 15.577              | 17.192    | Q247             |

**Supplementary Table 5. Biochemistry and hematology parameter assays for the chalcone derivative**

| Groups  | ALT<br>(U/l) | AST<br>(U/l) | BUN<br>(mmol/l) | WBC<br>(10 <sup>3</sup> /mm <sup>3</sup> ) | HGB<br>(g/dl) | RBC<br>(10 <sup>6</sup> /mm <sup>3</sup> ) | HCT<br>(%) | PLT<br>(10 <sup>3</sup> /mm <sup>3</sup> ) |
|---------|--------------|--------------|-----------------|--------------------------------------------|---------------|--------------------------------------------|------------|--------------------------------------------|
| Vehicle | 70.5 ± 6.9   | 89.5 ± 10.3  | 7.6 ± 0.9       | 5.6 ± 1.1                                  | 14.5 ± 1.4    | 9.7 ± 1.6                                  | 46.7 ± 6.1 | 671.3 ± 77.7                               |
| 2 mg    | 73.7 ± 9.1   | 87.9 ± 11.7  | 7.9 ± 1.2       | 5.2 ± 0.8                                  | 15.4 ± 1.9    | 9.5 ± 1.3                                  | 50.3 ± 7.1 | 689.5 ± 79.9                               |
| 4 mg    | 74.2 ± 9.2   | 95.8 ± 10.8  | 7.0 ± 1.5       | 6.2 ± 1.2                                  | 16.1 ± 1.7    | 10.9 ± 1.1                                 | 53.2 ± 6.2 | 725.1 ± 84.4                               |

ALT: alanine transaminase; AST: aspartate transaminase; BUN: blood urea nitrogen; WBC: white blood cell; HGB: haemoglobin; RBC: red blood cell; HCT: hematocrit; PLT: platelets.

**Supplementary Table 6. Biochemistry and hematology parameter assays for (DSS)<sub>6</sub>-chalcone derivative**

| Groups         | ALT<br>(U/l) | AST<br>(U/l) | BUN<br>(mmol/l) | WBC<br>(10 <sup>3</sup> /mm <sup>3</sup> ) | HGB<br>(g/dl) | RBC<br>(10 <sup>6</sup> /mm <sup>3</sup> ) | HCT<br>(%) | PLT<br>(10 <sup>3</sup> /mm <sup>3</sup> ) |
|----------------|--------------|--------------|-----------------|--------------------------------------------|---------------|--------------------------------------------|------------|--------------------------------------------|
| Single dose    |              |              |                 |                                            |               |                                            |            |                                            |
| Vehicle        | 68.7 ± 8.3   | 87.7 ± 11.9  | 7.3 ± 0.8       | 5.1 ± 0.7                                  | 13.8 ± 1.8    | 9.2 ± 1.3                                  | 44.1 ± 5.4 | 688.4 ± 74.3                               |
| 2.5 µmol/kg    | 72.9 ± 6.8   | 84.4 ± 11.4  | 6.8 ± 0.9       | 4.7 ± 0.9                                  | 14.3 ± 1.9    | 8.8 ± 1.1                                  | 46.3 ± 6.4 | 694.6 ± 77.9                               |
| 5.0 µmol/kg    | 69.7 ± 8.3   | 93.3 ± 12.4  | 7.5 ± 1.1       | 5.3 ± 0.8                                  | 13.5 ± 1.6    | 9.8 ± 1.3                                  | 47.7 ± 7.5 | 715.4 ± 80.3                               |
| 10.0 µmol/kg   | 74.5 ± 8.7   | 90.3 ± 11.4  | 6.5 ± 0.8       | 5.0 ± 0.9                                  | 14.5 ± 1.9    | 9.5 ± 1.2                                  | 44.3 ± 6.5 | 710.5 ± 86.7                               |
| 15.0 µmol/kg   | 67.7 ± 8.1   | 95.1 ± 10.3  | 7.1 ± 0.9       | 5.4 ± 1.1                                  | 13.9 ± 2.1    | 10.2 ± 1.1                                 | 47.5 ± 7.3 | 720.3 ± 77.9                               |
| 20.0 µmol/kg   | 70.6 ± 6.8   | 92.1 ± 11.5  | 7.4 ± 1.0       | 4.9 ± 1.0                                  | 14.9 ± 2.5    | 9.4 ± 1.4                                  | 49.3 ± 6.6 | 729.3 ± 64.3                               |
| Multiple doses |              |              |                 |                                            |               |                                            |            |                                            |
| Vehicle        | 70.8 ± 8.4   | 86.5 ± 8.9   | 7.5 ± 0.8       | 5.5 ± 0.8                                  | 14.2 ± 1.8    | 10.8 ± 1.5                                 | 46.3 ± 5.7 | 714.3 ± 86.7                               |
| 10.0 µmol/kg   | 74.2 ± 8.3   | 91.3 ± 9.9   | 8.0 ± 1.2       | 5.9 ± 1.1                                  | 15.4 ± 2.2    | 11.2 ± 2.1                                 | 52.7 ± 6.9 | 728.2 ± 79.8                               |

ALT: alanine transaminase; AST: aspartate transaminase; BUN: blood urea nitrogen; WBC: white blood cell; HGB: haemoglobin; RBC: red blood cell; HCT: hematocrit; PLT: platelets.
